# Supplementary material for: Synthesis and NLRP3-Inflammasome Inhibitory Activity of the Naturally Occurring Velutone F and of Its Non-Natural Regioisomeric Chalconoids
Source: MDPI journal article supplement (doi:10.3390/ijms23168957), 2022-08-11
Supplement: s1 [file s1]

# Synthesis and NLRP3-inflammasome inhibitory activity of the naturally occurring Velutone F and of its non-natural regioisomeric chalconoids

Tiziano De Ventura<sup>1§</sup>, Mariasole Perrone<sup>2,3§</sup>, Sonia Missiroli<sup>2,3</sup>, Paolo Pinton<sup>2,3,4</sup>, Paolo Marchetti<sup>1</sup>, Giovanni Strazzabosco<sup>1</sup>, Giulia Turrin<sup>1</sup>, Davide Illuminati<sup>1</sup>, Virginia Cristofori<sup>1</sup>, Anna Fantinati<sup>5</sup>, Martina Fabbri<sup>1</sup>, Carlotta Giorgi<sup>2,3\*</sup>, Claudio Trapella<sup>1,3\*</sup> and Vinicio Zanirato<sup>1</sup>

<sup>1</sup>Department of Chemistry, Pharmaceutical and Agricultural Sciences. University of Ferrara Via Luigi Borsari 46, 44121 Ferrara, Italy

<sup>2</sup>Department of Medical Sciences, Section of Experimental Medicine. University of Ferrara Via Fossato di Mortara,64/b, 44121 Ferrara, Italy.

<sup>3</sup> Laboratory for Technologies of Advanced Therapies (LTTA) Via Fossato di Mortara,70, 44121 Ferrara, Italy

<sup>4</sup> Maria Cecilia Hospital, GVM Care & Research, 48033 Cotignola, Italy

<sup>5</sup> Department of Environmental and Prevention Sciences, University of Ferrara, Via Fossato di Mortara 17, 44121 Ferrara, Italy.

\*Corresponding authors

§Both the authors contributed equally

## Summary

|                                                                      |           |
|----------------------------------------------------------------------|-----------|
| <b>METHYL 3-(4-METHOXY-4-OXOBUTANOYL)FURAN-2-CARBOXYLATE (3)</b>     | <b>3</b>  |
| <b>METHYL 3-(1,1,4-TRIMETHOXY-4-OXOBUTYL)FURAN-2-CARBOXYLATE (4)</b> | <b>5</b>  |
| <b>METHYL 4-HYDROXY-7-METHOXYBENZOFURAN-5-CARBOXYLATE (5)</b>        | <b>7</b>  |
| <b>METHYL 4,7-DIMETHOXYBENZOFURAN-5-CARBOXYLATE (6)</b>              | <b>9</b>  |
| <b>4,7-DIMETHOXYBENZOFURAN-5-CARBALDEHYDE (7)</b>                    | <b>11</b> |
| <b>2,5-DIMETHOXYPHENOL (9)</b>                                       | <b>13</b> |
| <b>4-BROMO-2,5-DIMETHOXYPHENOL (10)</b>                              | <b>15</b> |
| <b>1-BROMO-4-(2,2-DIMETHOXYETHOXY)-2,5-DIMETHOXYBENZENE (11)</b>     | <b>17</b> |
| <b>5-BROMO-4,7-DIMETHOXYBENZOFURAN (12)</b>                          | <b>19</b> |
| <b>1-PHENYLPROP-2-EN-1-ONE (13)</b>                                  | <b>22</b> |
| <b>2-(2,5-DIMETHOXYPHENOXY)TETRAHYDRO-2H-PYRAN (14)</b>              | <b>24</b> |
| <b>2-HYDROXY-3,6-DIMETHOXYBENZALDEHYDE (15)</b>                      | <b>24</b> |
| <b>3-BROMO-6-HYDROXY-2,5-DIMETHOXYBENZALDEHYDE (16)</b>              | <b>26</b> |
| <b>ETHYL 2-(4-BROMO-2-FORMYL-3,6-DIMETHOXYPHENOXY)ACETATE (17)</b>   | <b>29</b> |

|                                                                                                 |           |
|-------------------------------------------------------------------------------------------------|-----------|
| <u>2-(3-BROMO-6-FORMYL-2,5-DIMETHOXYPHENOXY)ACETIC ACID</u>                                     | <u>32</u> |
| <u>(E)-3-(4,7-DIMETHOXYBENZOFURAN-5-YL)-1-PHENYLPROP-2-EN-1-ONE (1)</u>                         | <u>35</u> |
| <u>2-(2,2-DIMETHOXYETHOXY)-1,4-DIMETHOXYBENZENE (18)</u>                                        | <u>40</u> |
| <u>4,7-DIMETHOXYBENZOFURAN (19)</u>                                                             | <u>42</u> |
| <u>4,7-DIMETHOXYBENZOFURAN-2-CARBALDEHYDE (20) + 4,7-DIMETHOXYBENZOFURAN-5-CARBALDEHYDE (7)</u> | <u>44</u> |
| <u>4,7-DIMETHOXYBENZOFURAN-6-CARBALDEHYDE (21)</u>                                              | <u>47</u> |
| <u>1-(2,5-DIMETHOXYPHENOXY)PROPAN-2-ONE (24)</u>                                                | <u>49</u> |
| <u>4,7-DIMETHOXY-3-METHYLBENZOFURAN (25)</u>                                                    | <u>52</u> |
| <u>(4,7-DIMETHOXYBENZOFURAN-3-YL)METHANOL (26)</u>                                              | <u>55</u> |
| <u>4,7-DIMETHOXYBENZOFURAN-3-CARBALDEHYDE (27)</u>                                              | <u>58</u> |
| <u>(E)-3-(4,7-DIMETHOXYBENZOFURAN-6-YL)-1-PHENYLPROP-2-EN-1-ONE (23)</u>                        | <u>61</u> |
| <u>(E)-3-(4,7-DIMETHOXYBENZOFURAN-2-YL)-1-PHENYLPROP-2-EN-1-ONE (22)</u>                        | <u>68</u> |
| <u>(E)-3-(4,7-DIMETHOXYBENZOFURAN-3-YL)-1-PHENYLPROP-2-EN-1-ONE (28)</u>                        | <u>73</u> |

methyl 3-(4-methoxy-4-oxobutanoyl)furan-2-carboxylate (**3**)

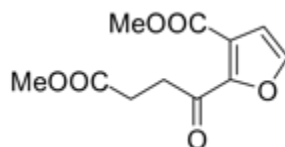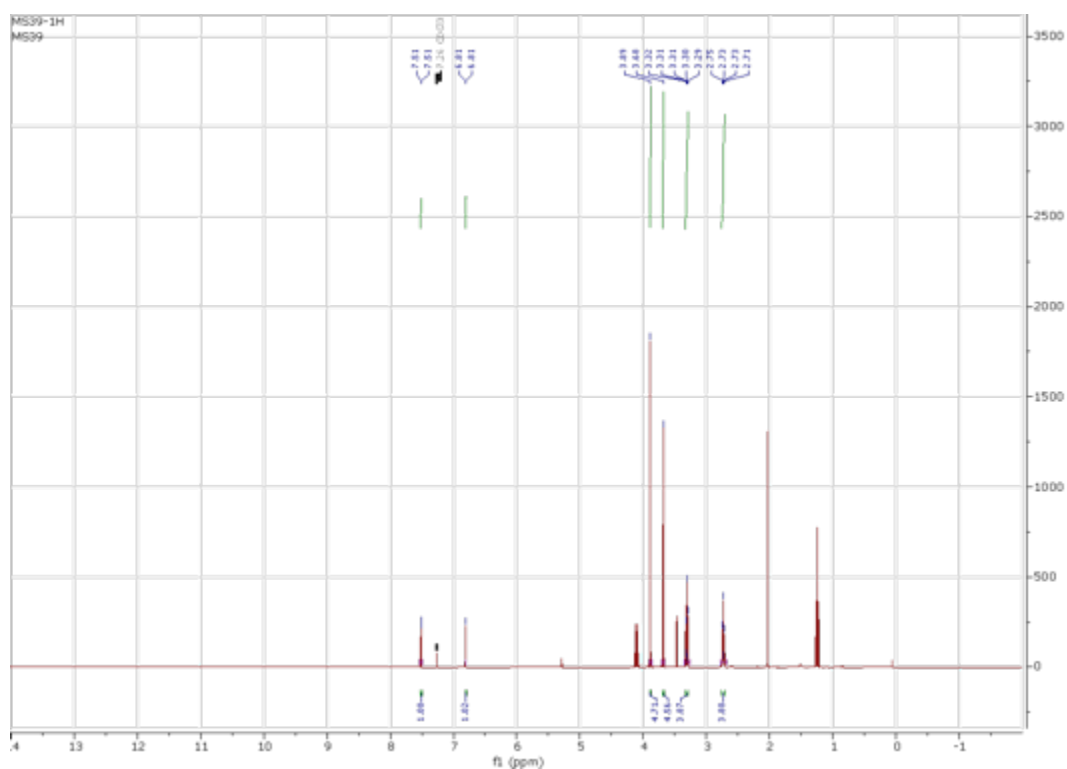

$^1\text{H}$  NMR (400 MHz, Chloroform-*d*)  $\delta$  7.51 (d,  $J$  = 1.7 Hz, 1H), 6.81 (d,  $J$  = 1.7 Hz, 1H), 3.89 (s, 3H), 3.68 (s, 3H), 3.31 (t,  $J$  = 6.7 Hz, 2H), 2.73 (t,  $J$  = 6.6 Hz, 2H).

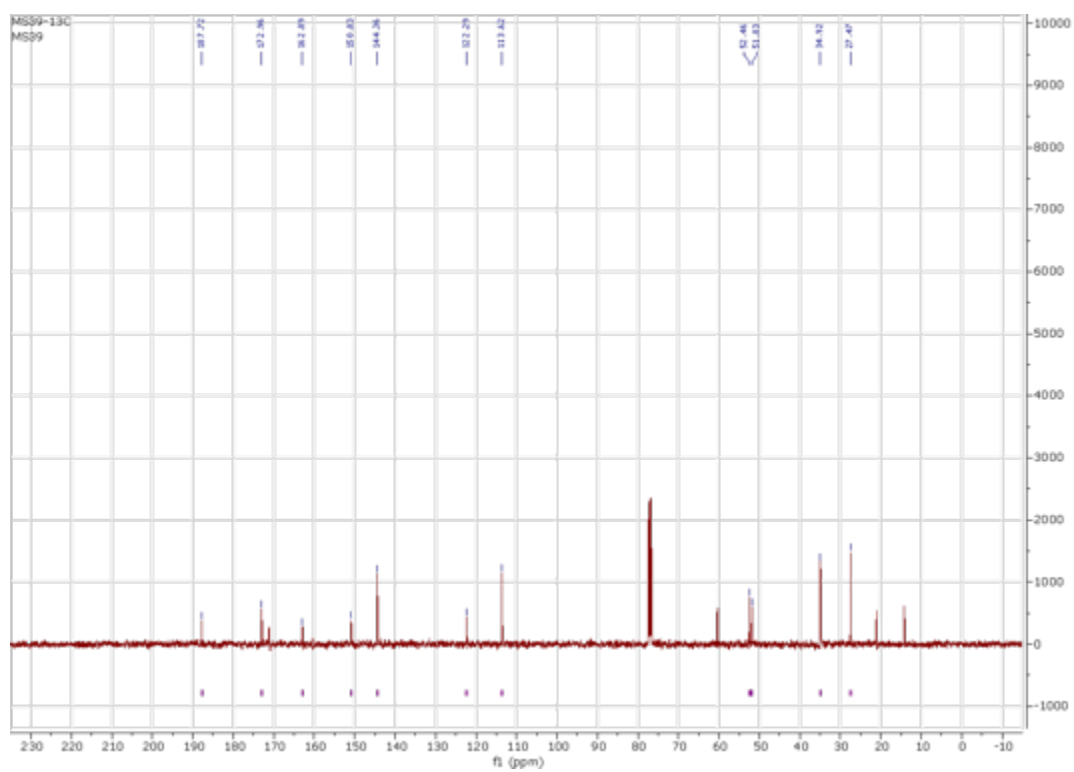

<sup>13</sup>C NMR (101 MHz, Chloroform-d)  $\delta$  187.72, 172.96, 162.89, 150.83, 144.36, 122.29, 113.62, 52.46, 51.83, 34.92, 27.47.

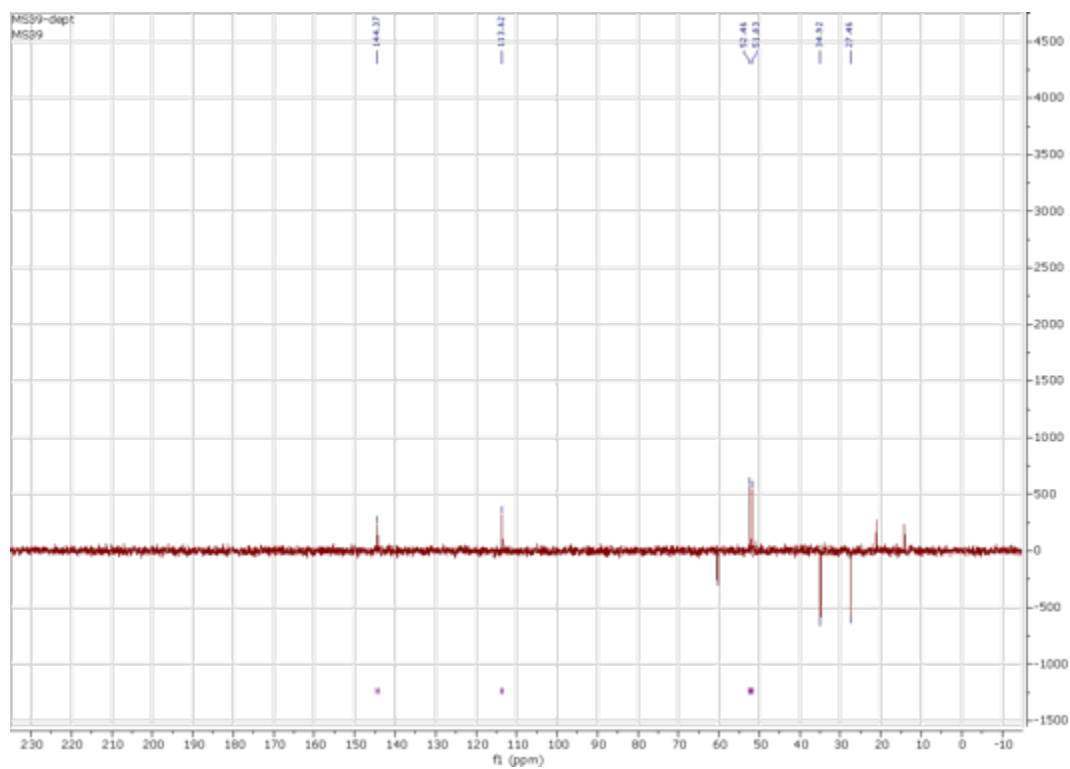

<sup>13</sup>C NMR (101 MHz, Chloroform-d)  $\delta$  144.37, 113.62, 52.46, 51.83, 34.92, 27.46.

methyl 3-(1,1,4-trimethoxy-4-oxobutyl)furan-2-carboxylate (**4**)

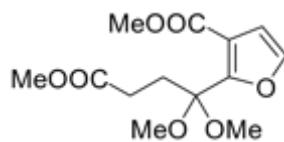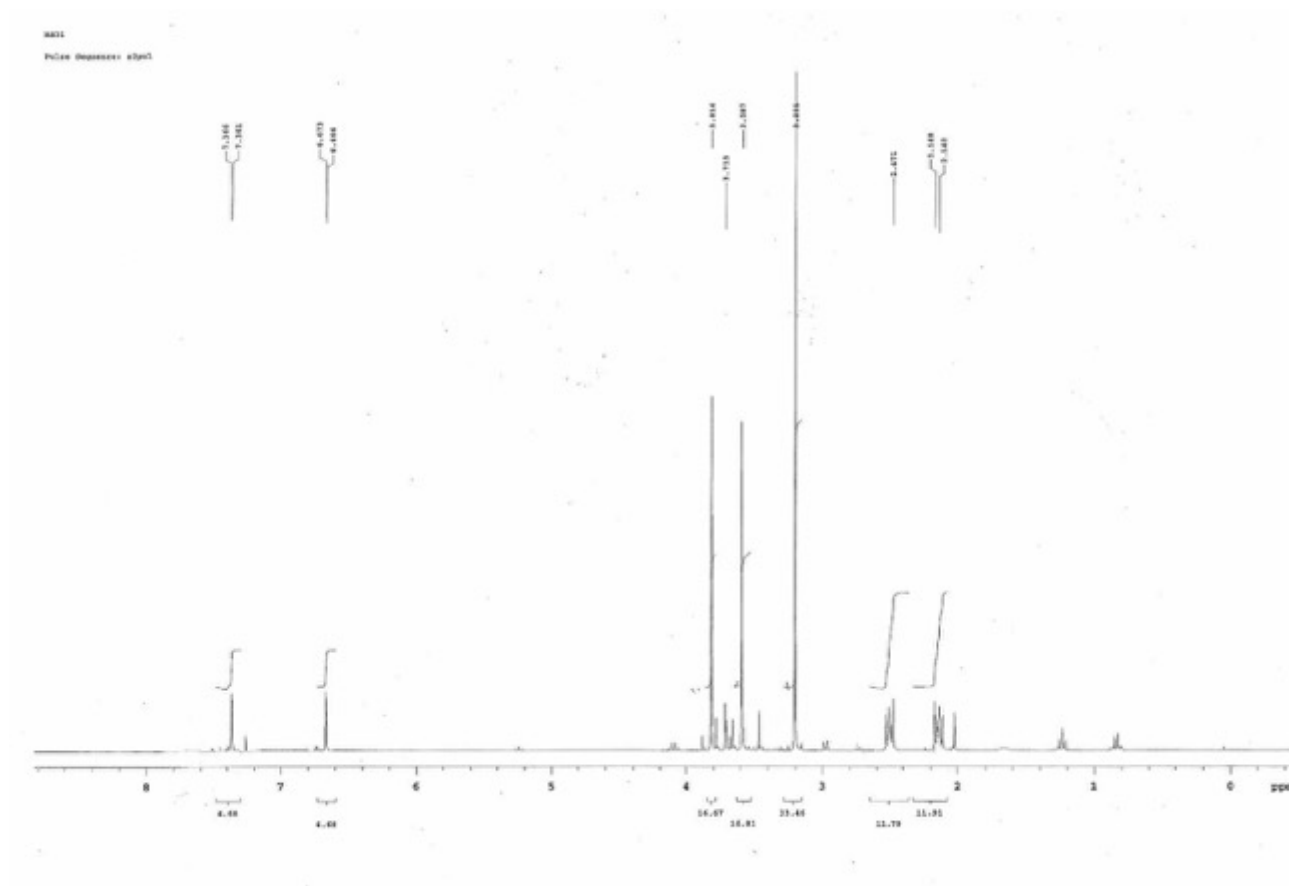

$^1\text{H}$  NMR (400 MHz, Chloroform-*d*)  $\delta$  7.36 (d,  $J$  = 1.7 Hz, 1H), 6.66 (d,  $J$  = 1.7 Hz, 1H), 3.81 (s, 3H), 3.58 (s, 3H), 3.20 (s, 6H), 2.47 (t,  $J$  = 6.7 Hz, 2H), 2.16 (t,  $J$  = 6.6 Hz, 2H).

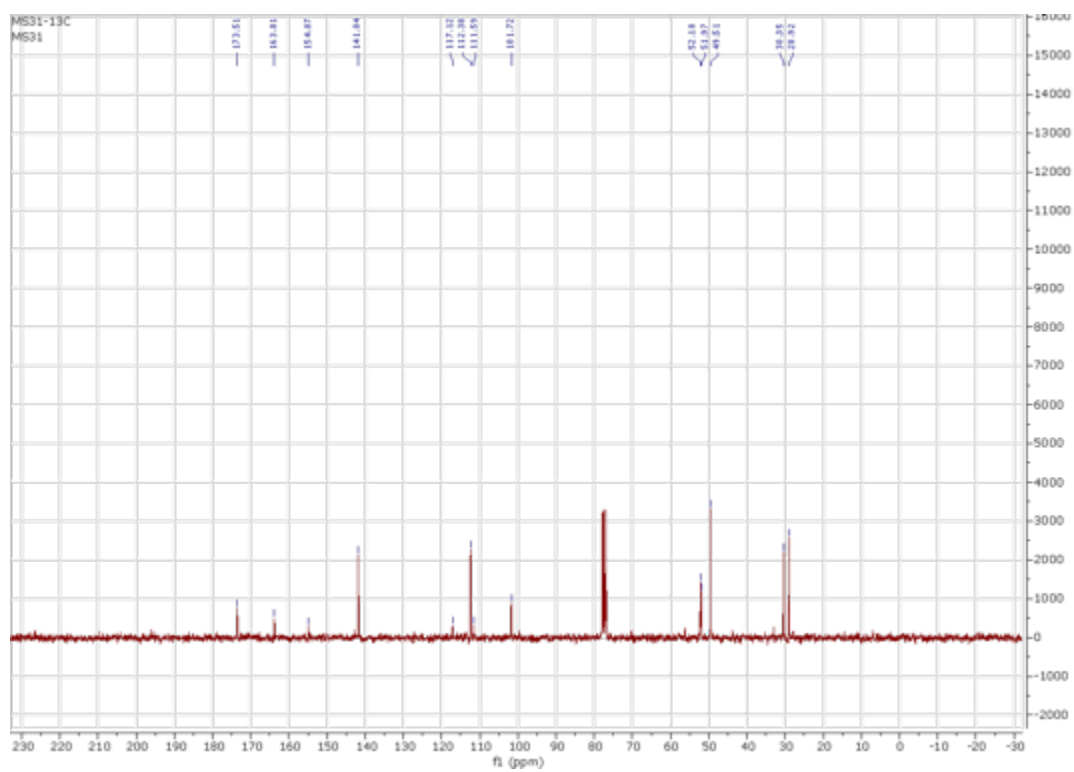

$^{13}\text{C}$  NMR (75 MHz, Chloroform-d)  $\delta$  173.51, 163.81, 154.87, 141.84, 117.12, 112.38, 111.59, 101.72, 52.18, 51.97, 49.51, 30.35, 28.92.

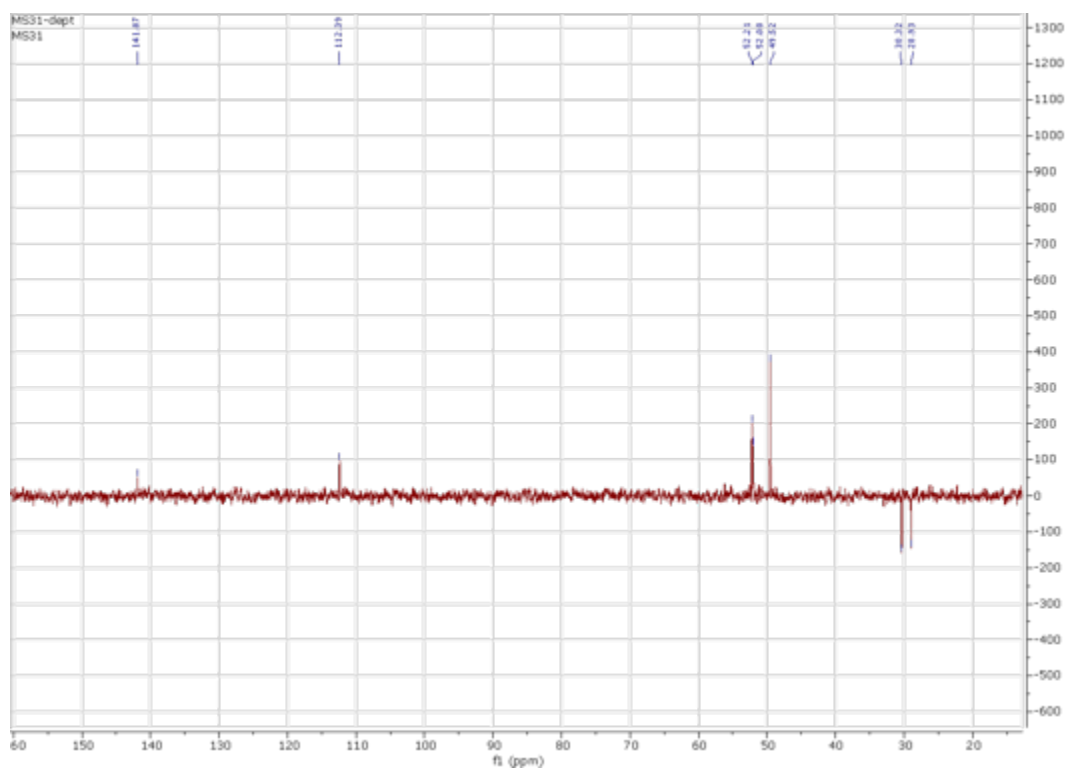

$^{13}\text{C}$  NMR (75 MHz, Chloroform-d)  $\delta$  141.87, 112.39, 52.21, 52.00, 49.52, 30.32, 28.93.

methyl 4-hydroxy-7-methoxybenzofuran-5-carboxylate (**5**)

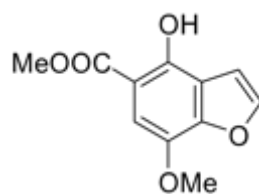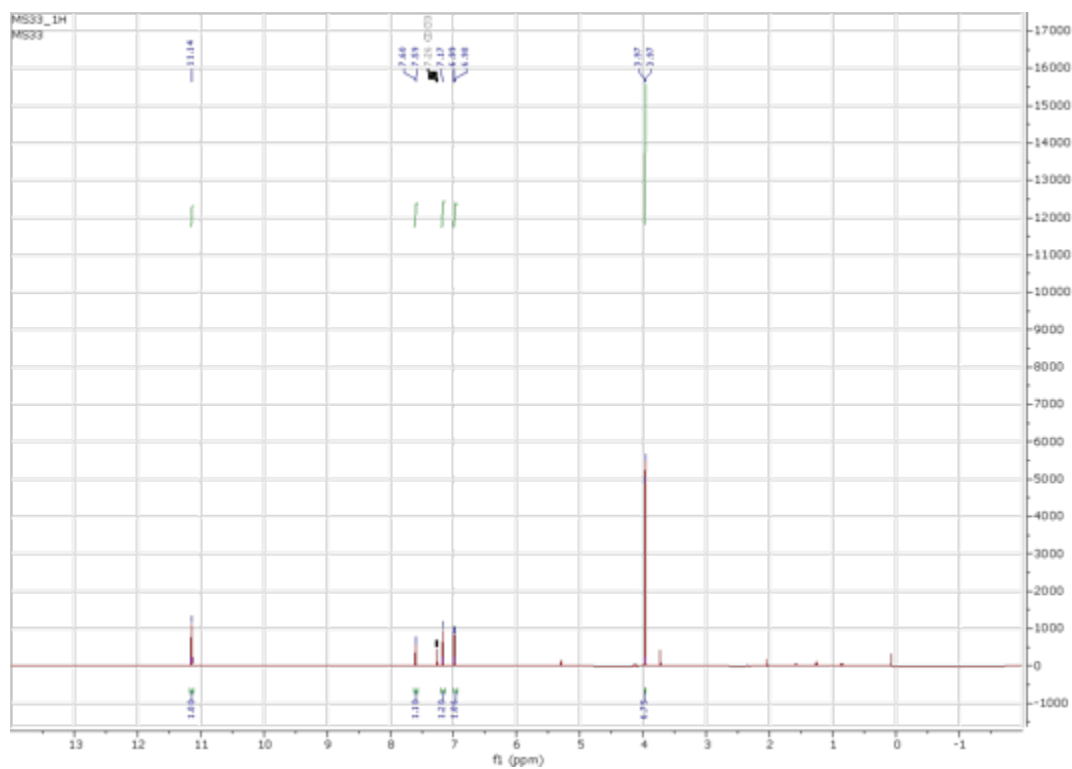

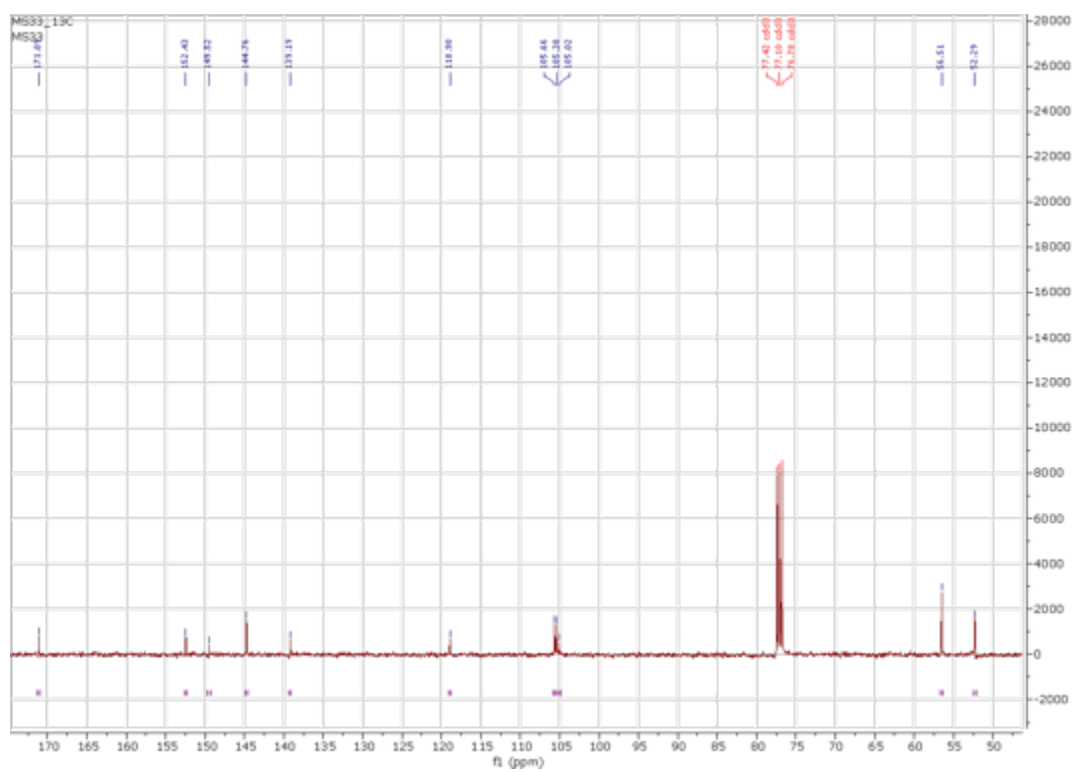

<sup>13</sup>C NMR (101 MHz, Chloroform-d)  $\delta$  171.09, 152.43, 149.52, 144.76, 139.19, 118.90, 105.66, 105.38, 105.02, 56.51, 52.29.

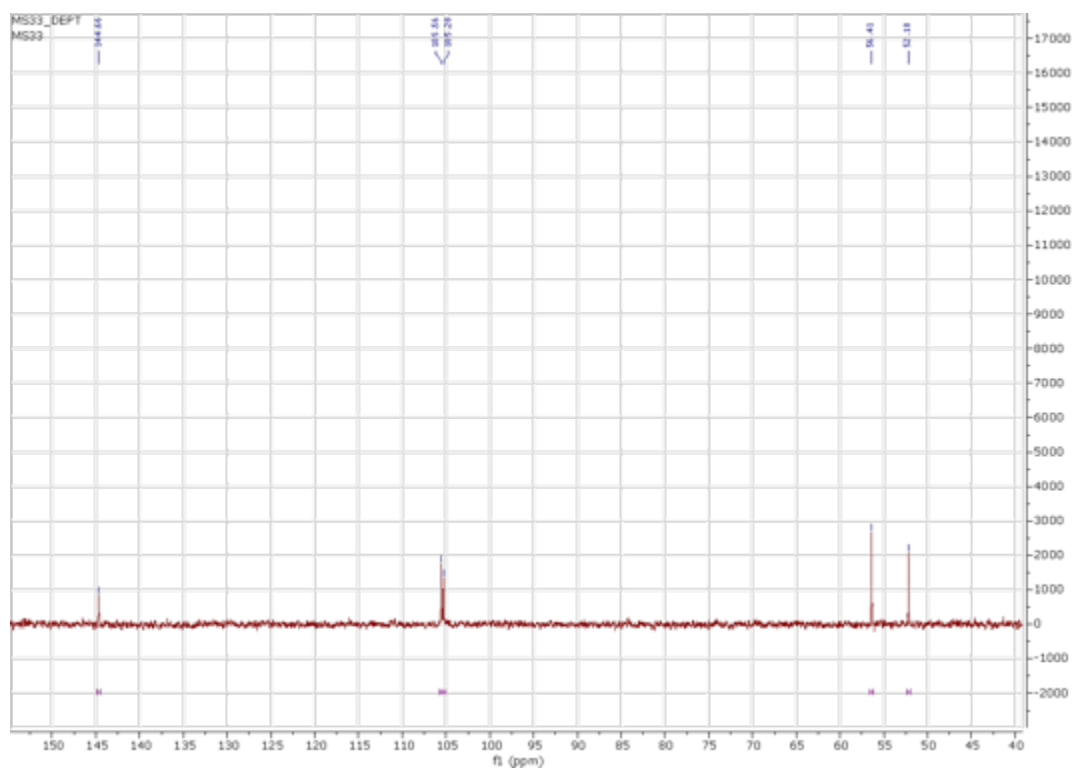

<sup>13</sup>C NMR (101 MHz, Chloroform-d)  $\delta$  144.66, 105.56, 105.28, 56.41, 52.18.



methyl 4,7-dimethoxybenzofuran-5-carboxylate (**6**)

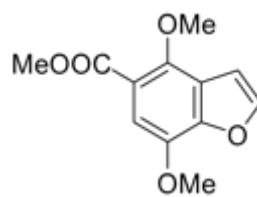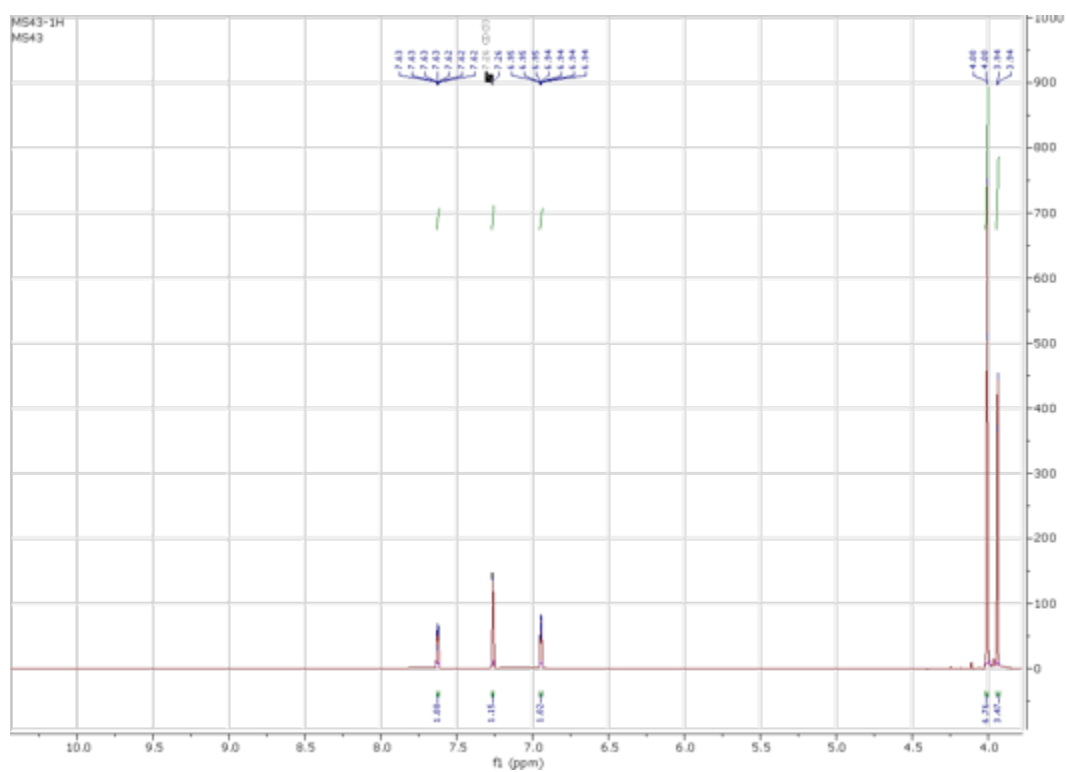

$^1\text{H}$  NMR (300 MHz, Chloroform-*d*)  $\delta$  7.63 – 7.61 (m, 1H), 7.26 (s, 1H), 6.95 – 6.94 (m, 1H), 4.00 (d,  $J$  = 0.8 Hz, 6H), 3.94 (d,  $J$  = 0.8 Hz, 3H).

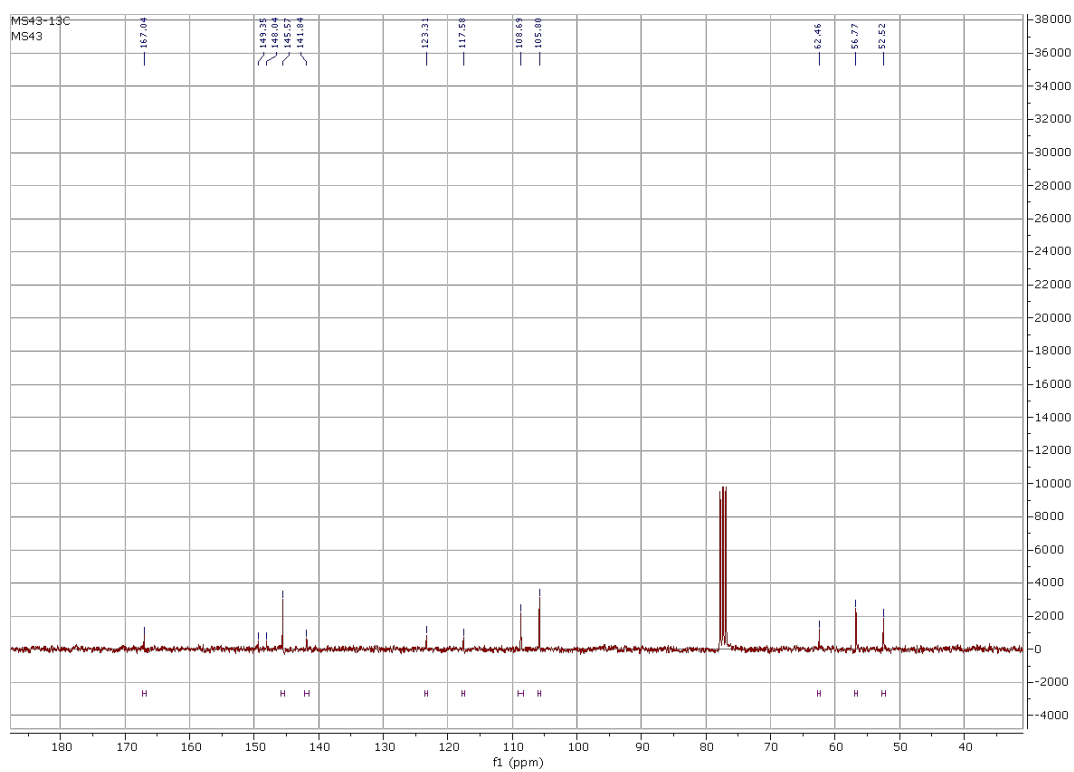

$^{13}\text{C}$  NMR (75 MHz, Chloroform- $d$ )  $\delta$  167.04, 149.35, 148.04, 145.57, 141.84, 123.31, 117.58, 108.69, 105.80, 62.46, 56.77, 52.52.

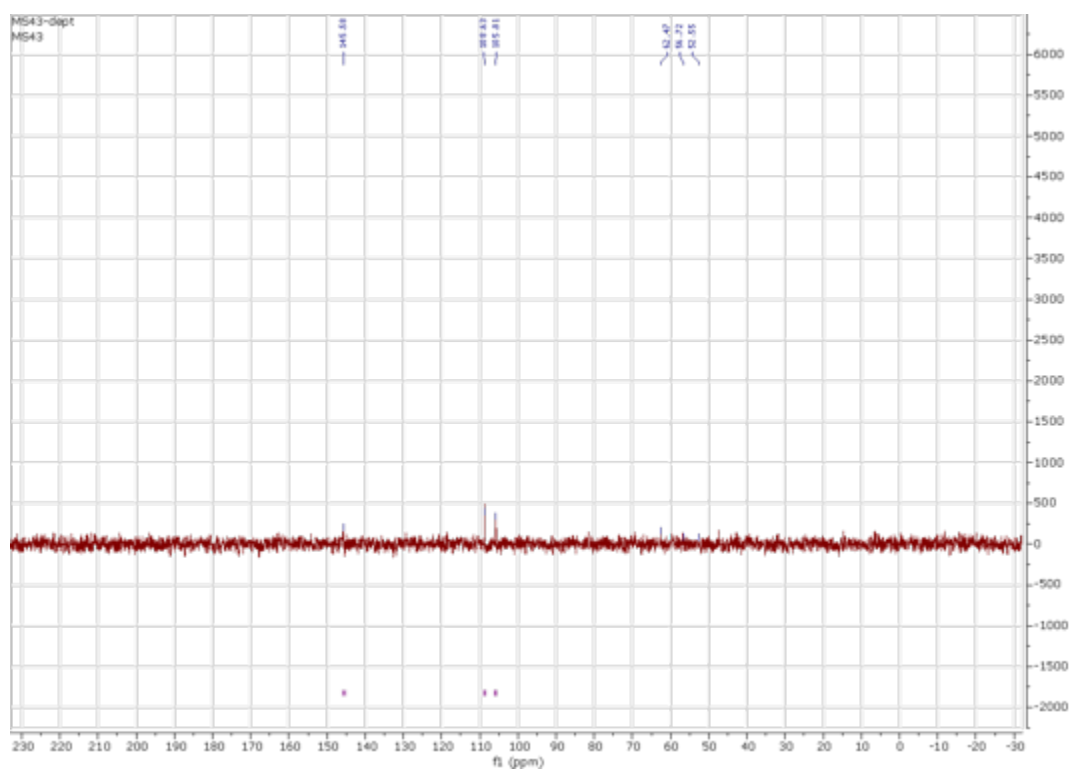

$^{13}\text{C}$  NMR (75 MHz, Chloroform- $d$ )  $\delta$  145.58, 108.63, 105.81, 62.47, 56.72, 52.55.

## 4,7-dimethoxybenzofuran-5-carbaldehyde (7)

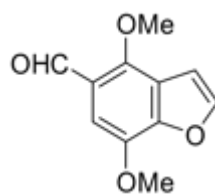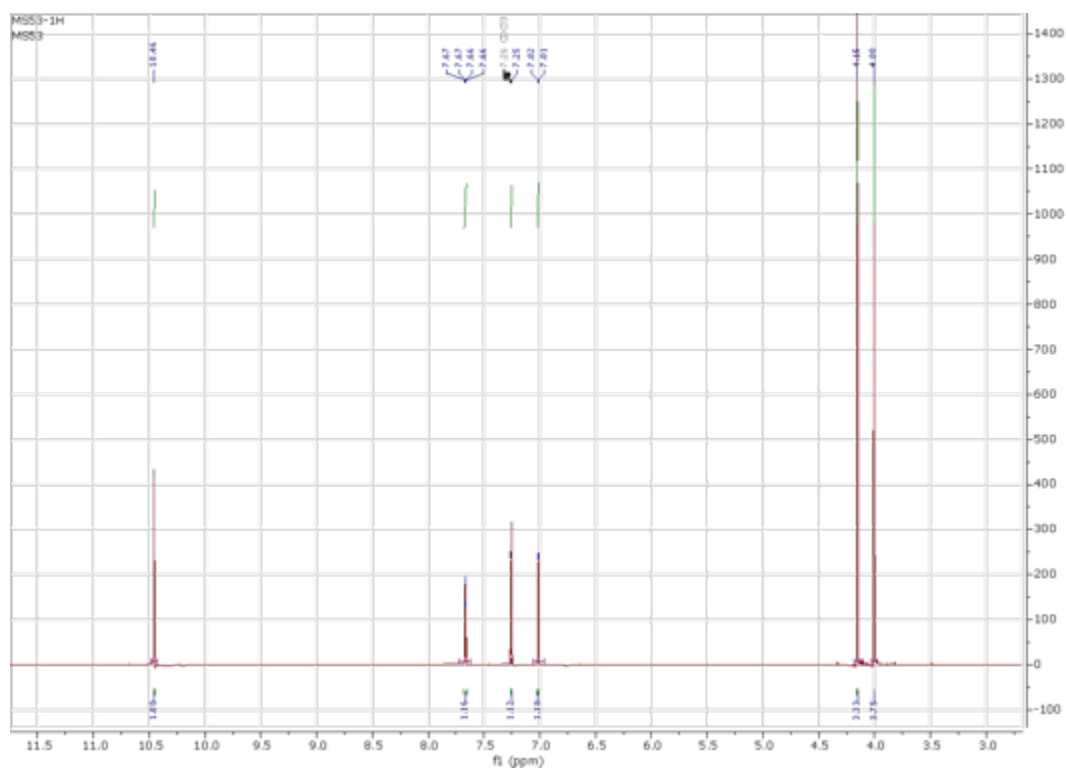

<sup>1</sup>H NMR (400 MHz, Chloroform-*d*)  $\delta$  10.46 (s, 1H), 7.67 (dd,  $J = 2.3, 0.4$  Hz, 1H), 7.25 (s, 1H), 7.02 (d,  $J = 2.3$  Hz, 1H), 4.15 (s, 3H), 4.00 (s, 3H).

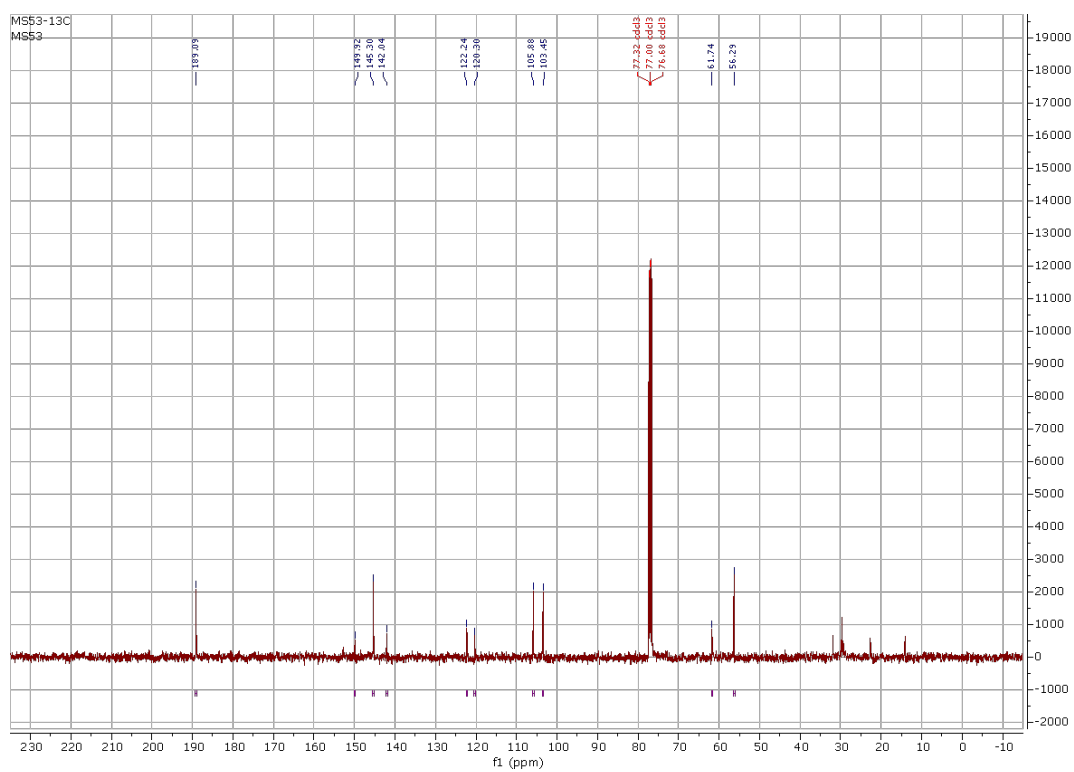

<sup>13</sup>C NMR (101 MHz, Chloroform-d) δ 189.09, 149.92, 145.30, 142.04, 122.24, 120.30, 105.88, 103.45, 61.74, 56.29.

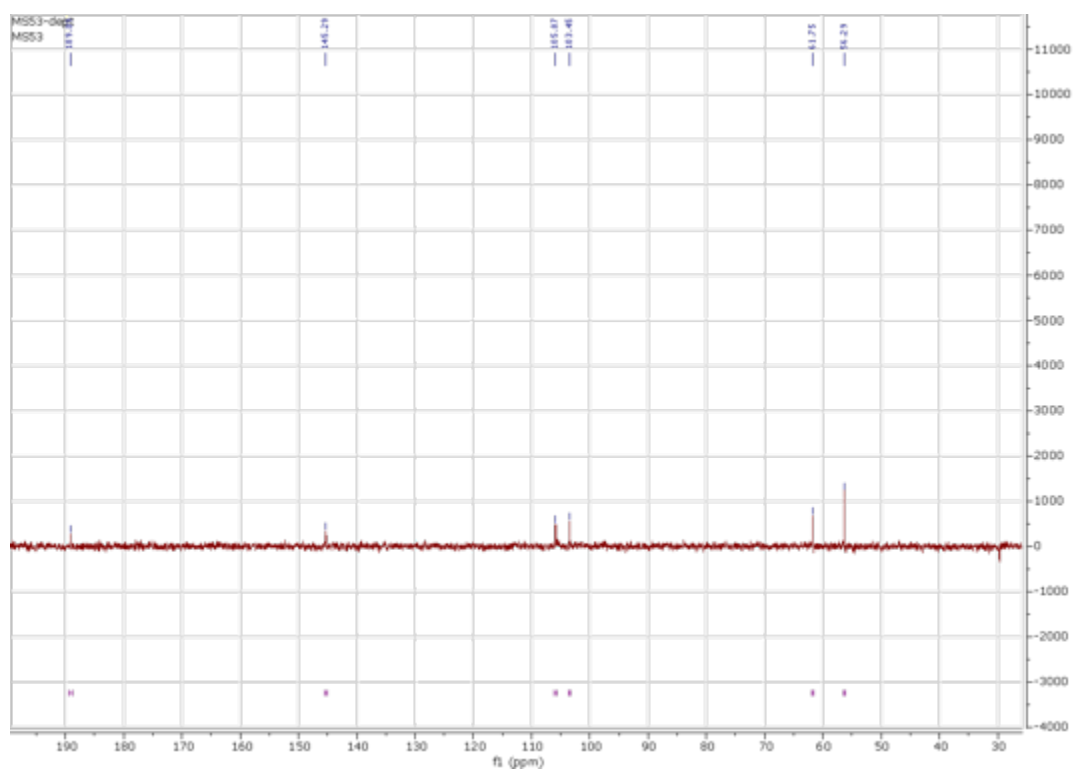

<sup>13</sup>C NMR (101 MHz, Chloroform-d) δ 189.09, 145.29, 105.87, 103.45, 61.75, 56.29.

## 2,5-dimethoxyphenol (9)

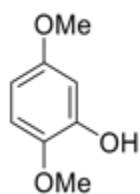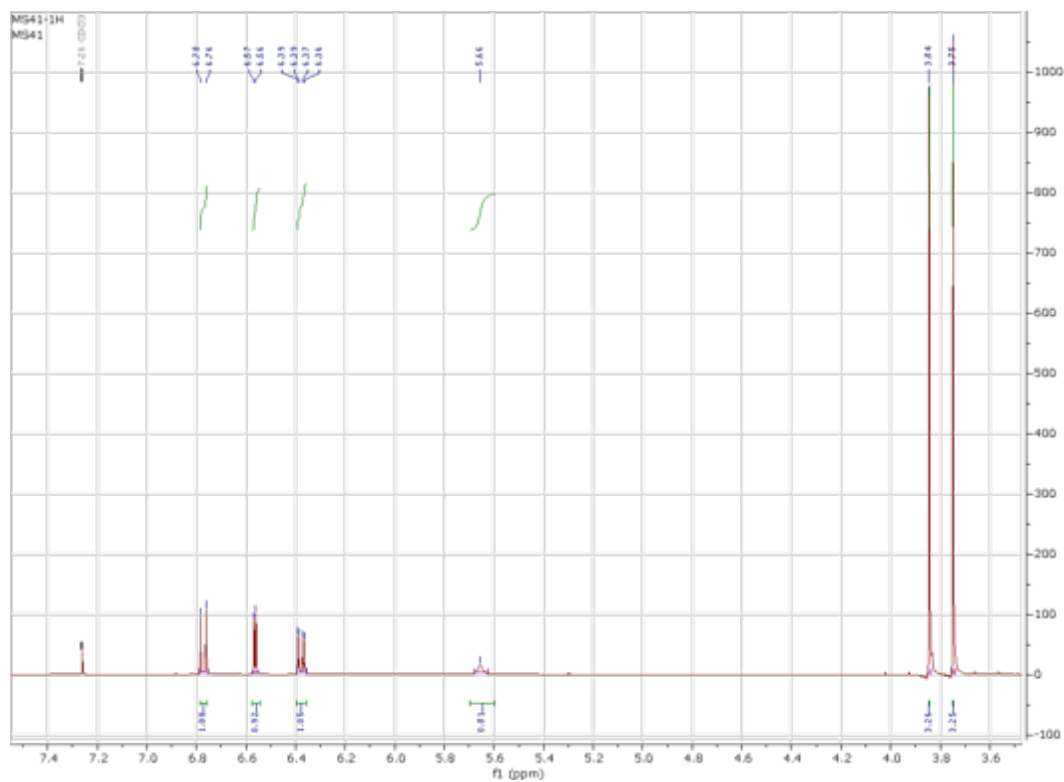

<sup>1</sup>H NMR (400 MHz, Chloroform-d)  $\delta$  6.77 (d,  $J$  = 8.8 Hz, 1H), 6.56 (d,  $J$  = 2.9 Hz, 1H), 6.38 (dd,  $J$  = 8.8, 2.9 Hz, 1H), 5.66 (s, 1H), 3.84 (s, 3H), 3.75 (s, 3H).

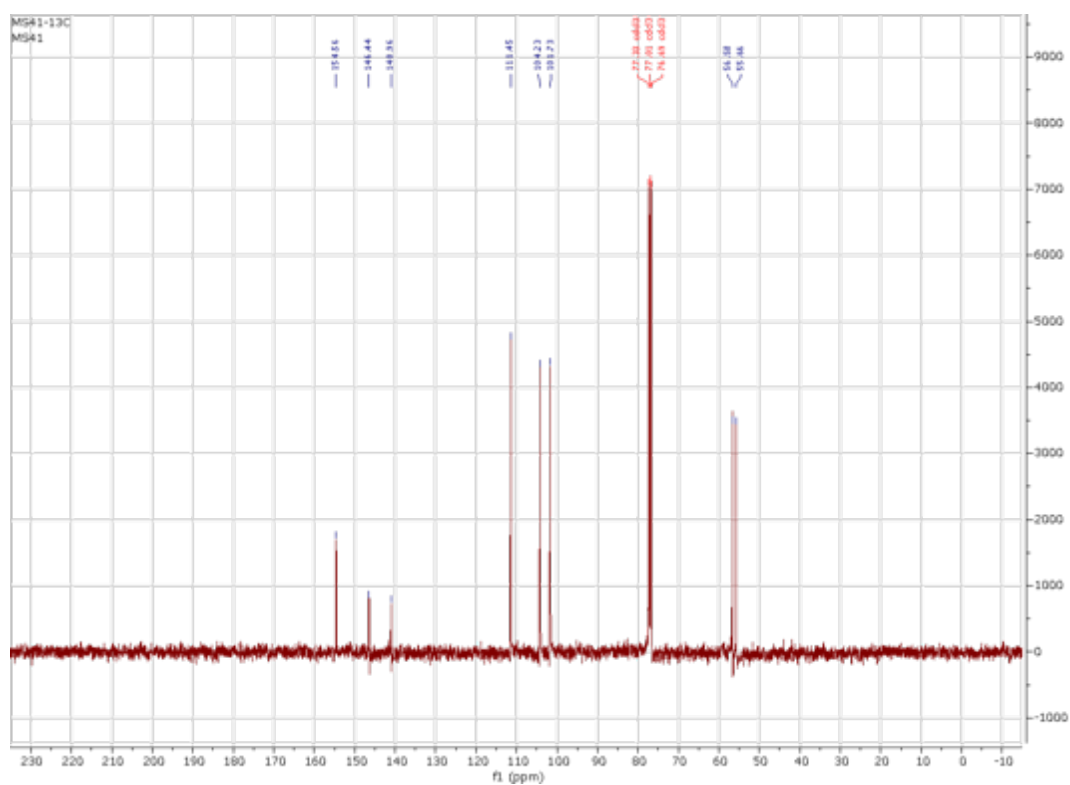

$^{13}\text{C}$  NMR (101 MHz, Chloroform-d)  $\delta$  154.56, 146.44, 140.96, 111.45, 104.23, 101.73, 56.58, 55.66.

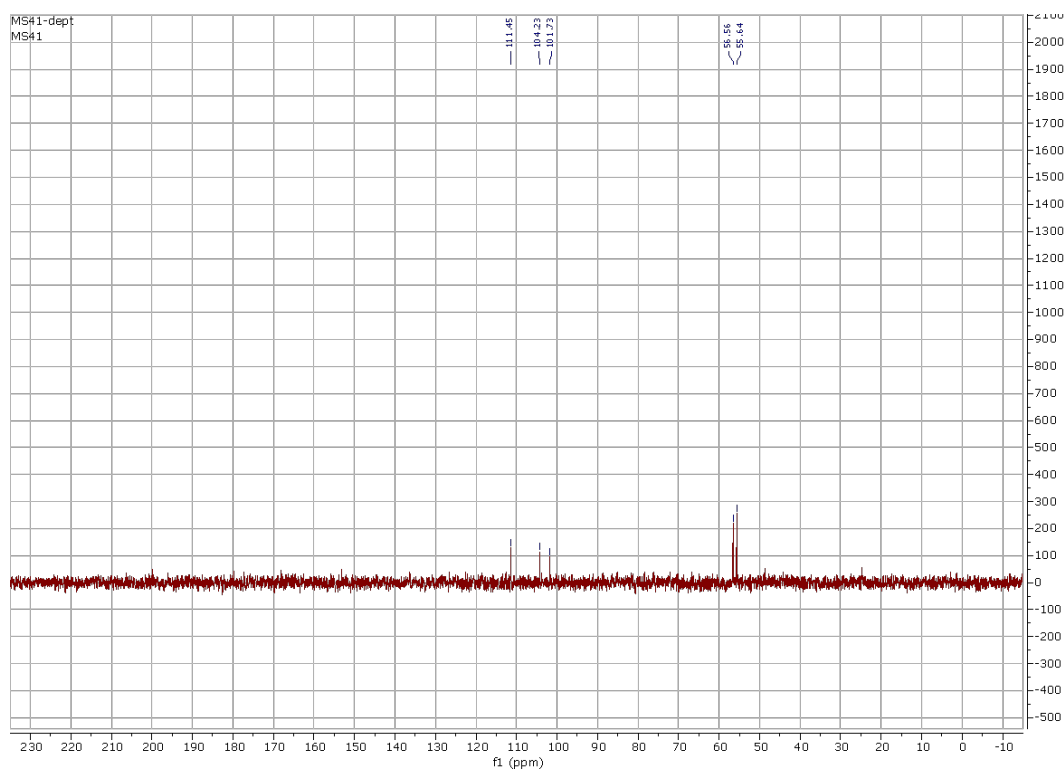

$^{13}\text{C}$  NMR (101 MHz, Chloroform-d)  $\delta$  111.45, 104.23, 101.73, 56.56, 55.64.

## 4-bromo-2,5-dimethoxyphenol (**10**)

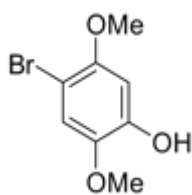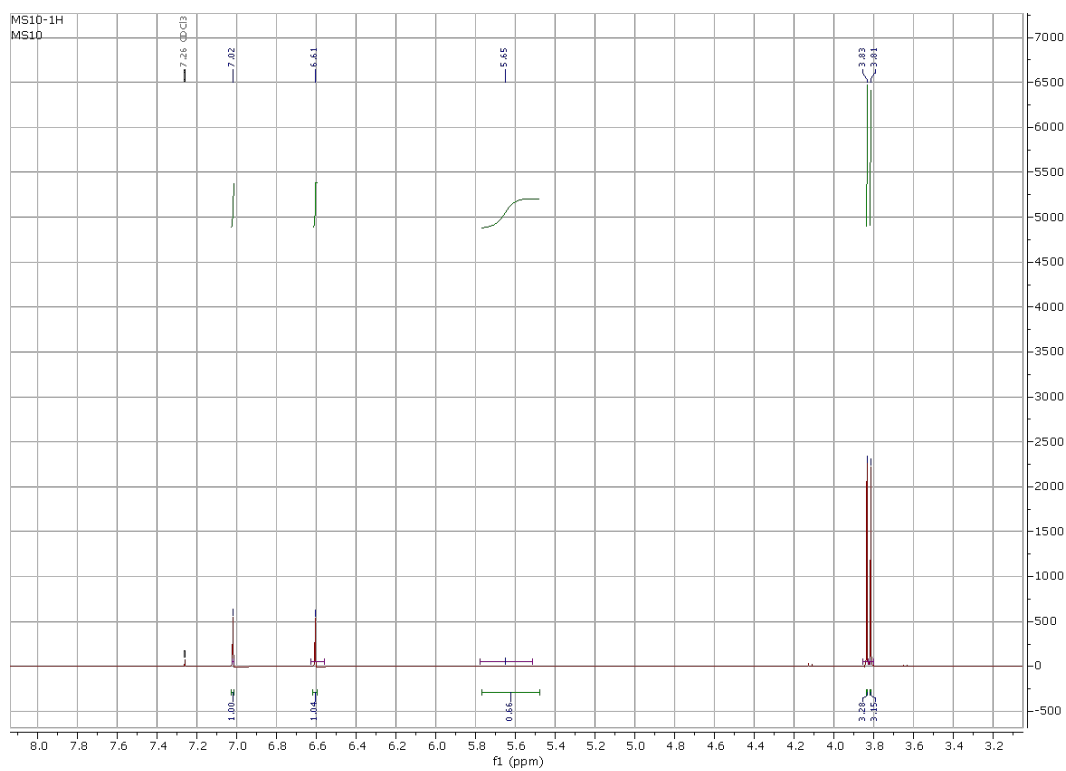

$^1\text{H}$  NMR (400 MHz, Chloroform- $d$ )  $\delta$  7.02 (s, 1H), 6.61 (s, 1H), 5.65 (s, 1H), 3.83 (s, 3H), 3.81 (s, 3H).

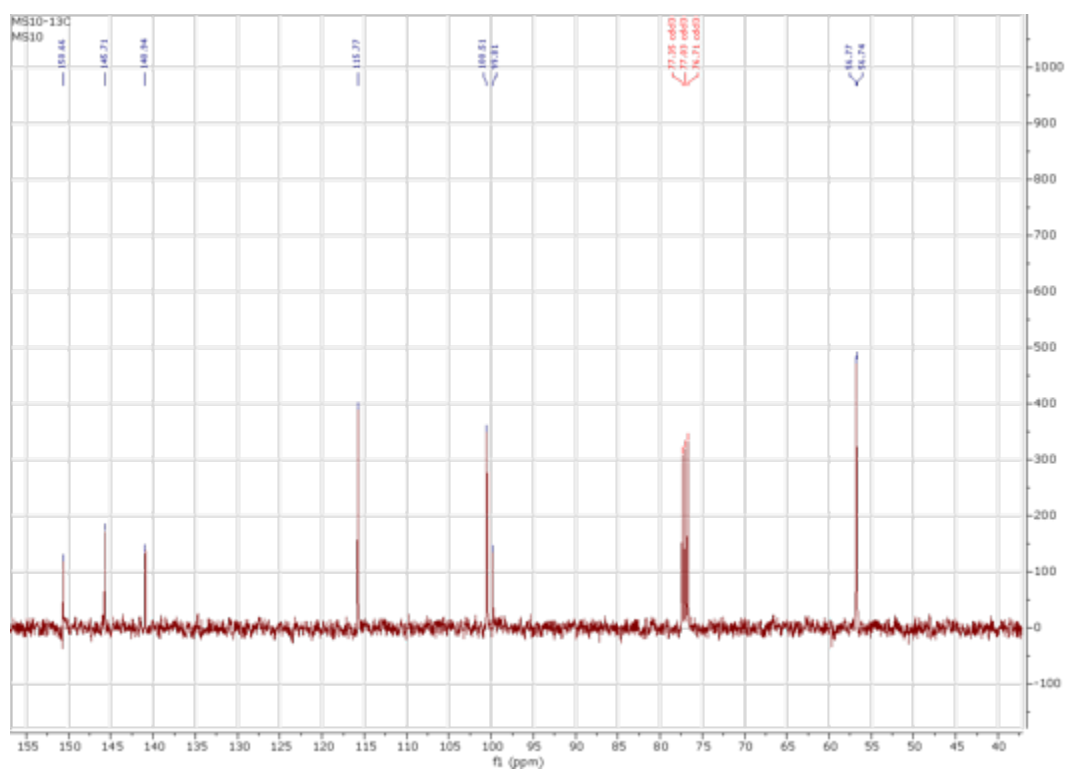

$^{13}\text{C}$  NMR (101 MHz, Chloroform-d)  $\delta$  150.66, 145.71, 140.94, 115.77, 100.51, 99.81, 56.77, 56.74.

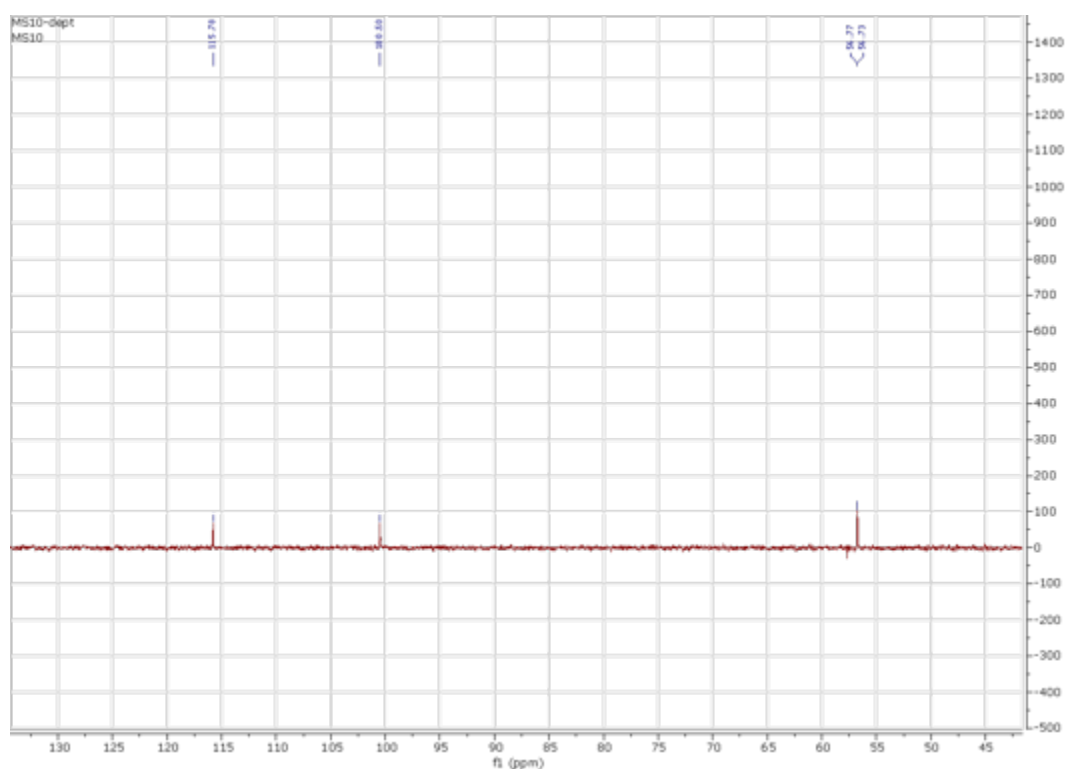

$^{13}\text{C}$  NMR (101 MHz, Chloroform-d)  $\delta$  115.78, 100.50, 56.77, 56.73.



1-bromo-4-(2,2-dimethoxyethoxy)-2,5-dimethoxybenzene (**11**)

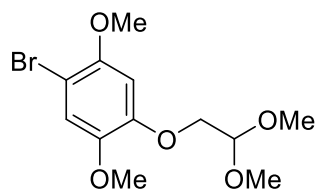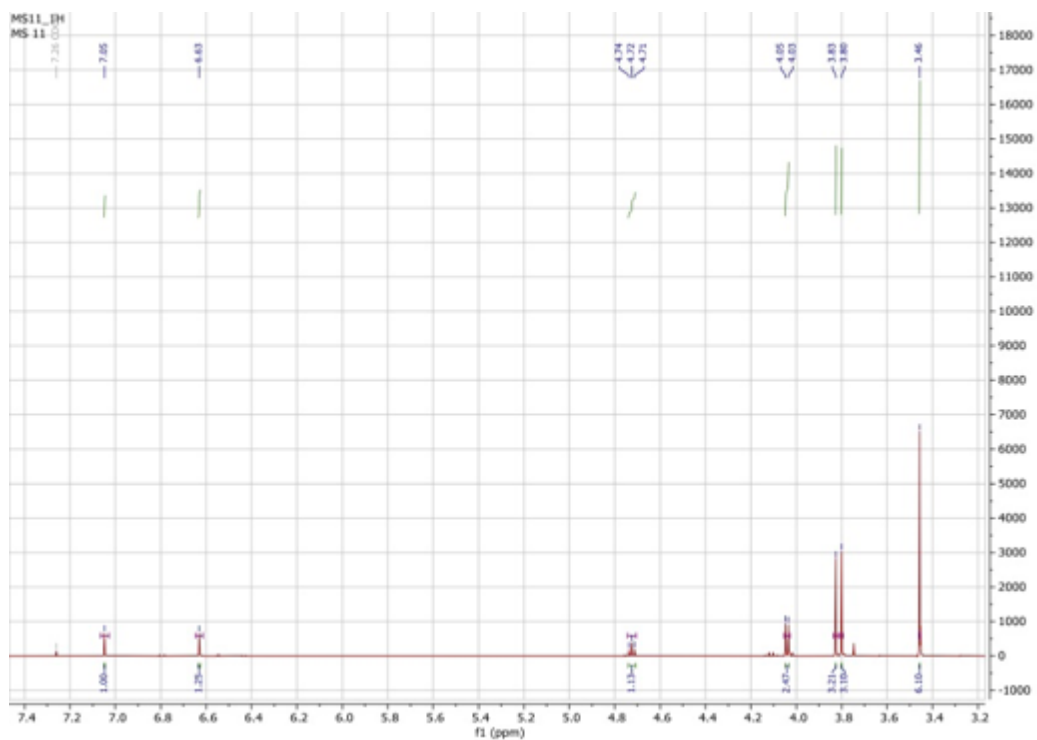

$^1\text{H}$  NMR (400 MHz, Chloroform- $d$ )  $\delta$  7.05 (s, 1H), 6.63 (s, 1H), 4.72 (t,  $J$  = 5.2 Hz, 1H), 4.04 (d,  $J$  = 5.2 Hz, 2H), 3.83 (s, 3H), 3.80 (s, 3H), 3.46 (s, 6H).

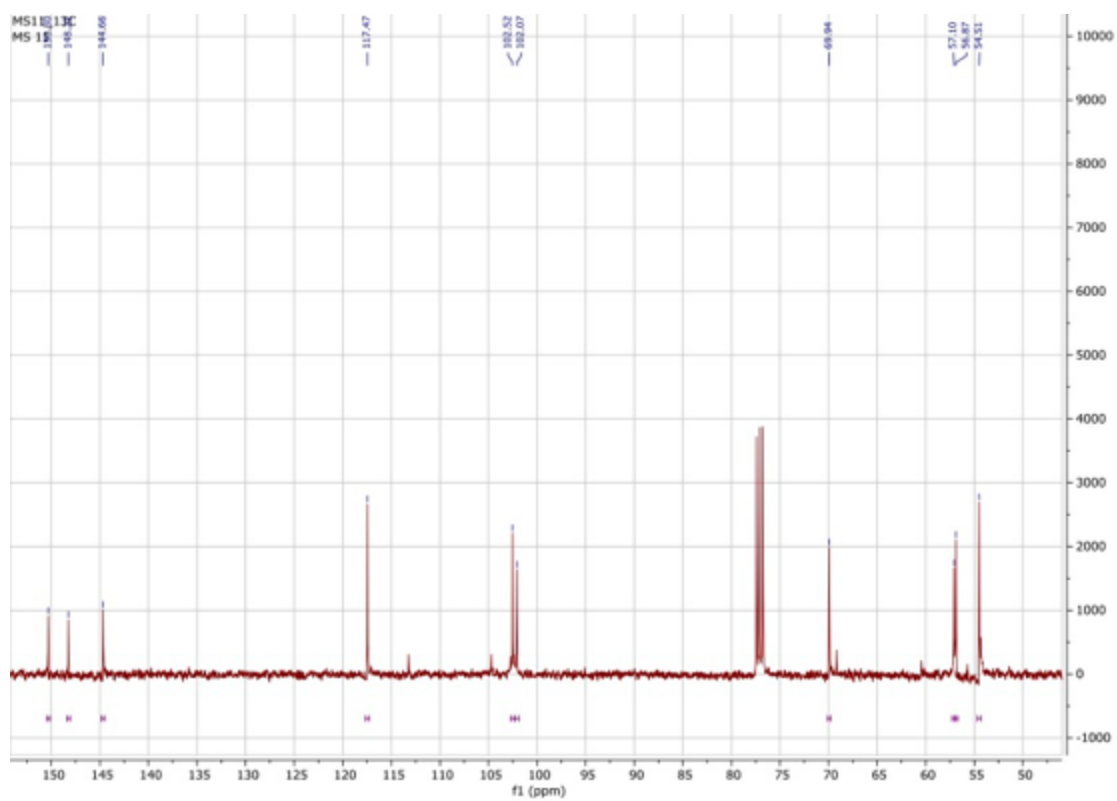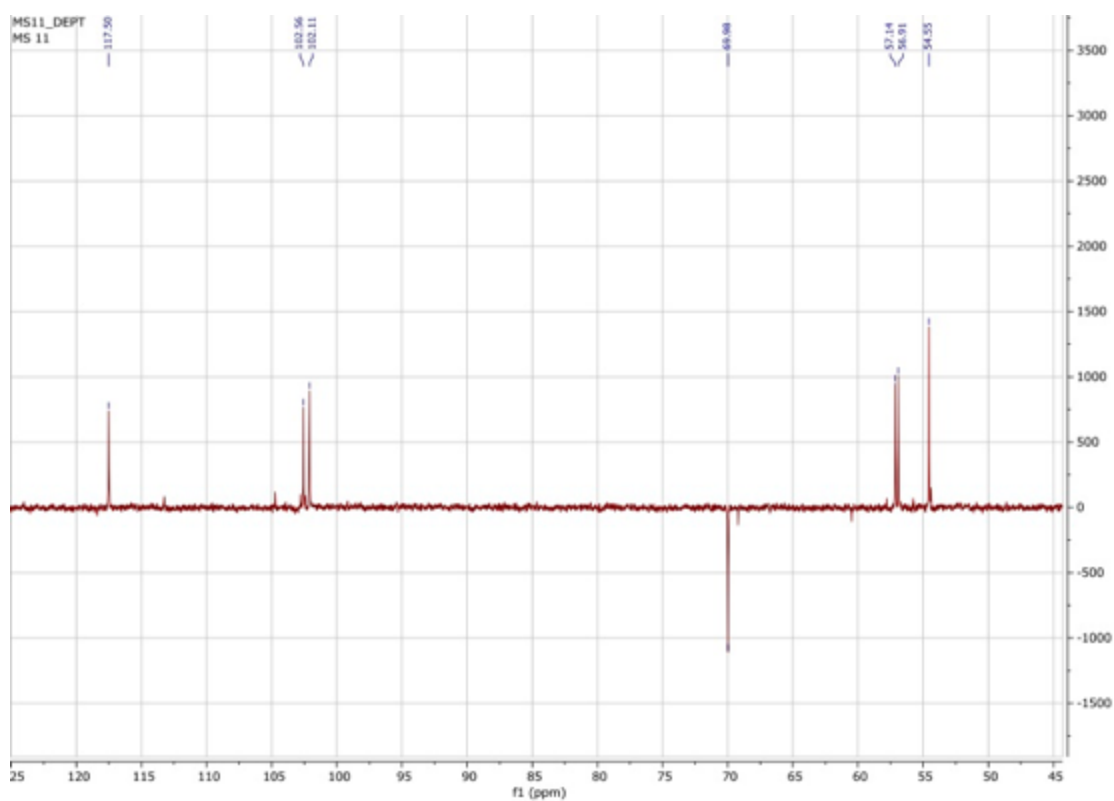

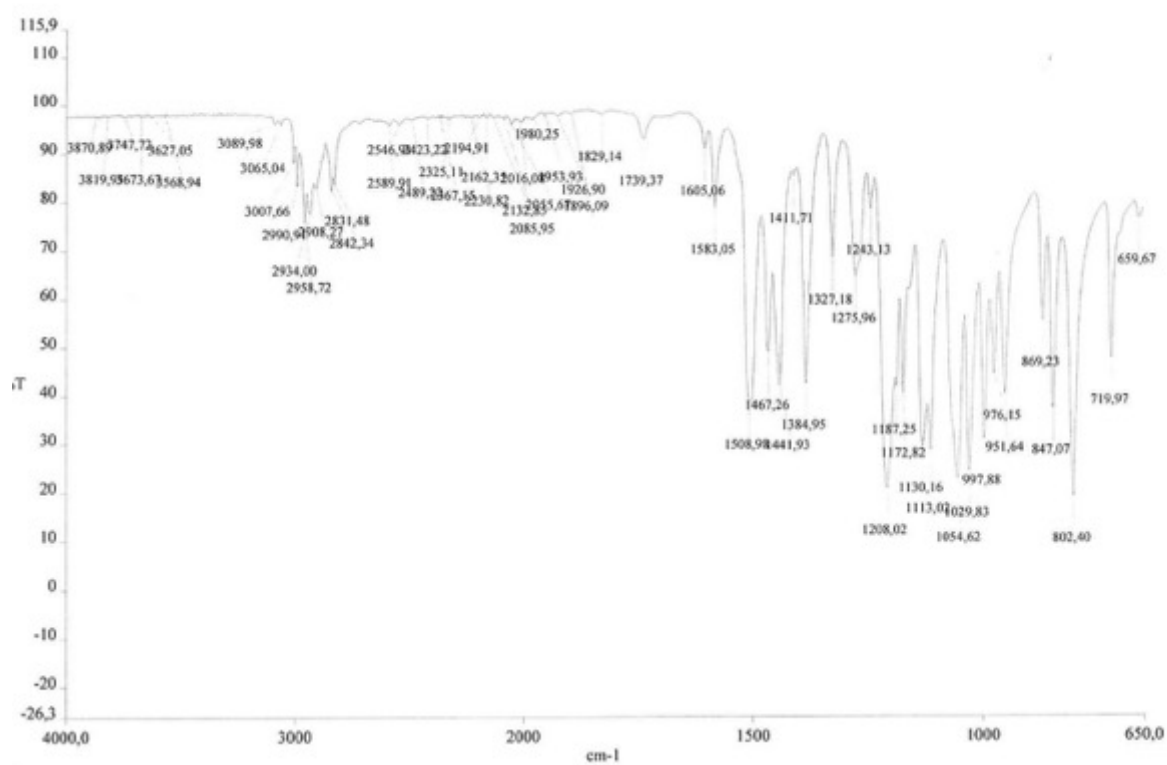

5-bromo-4,7-dimethoxybenzofuran (12)

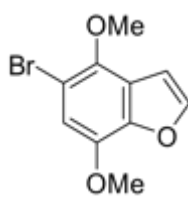

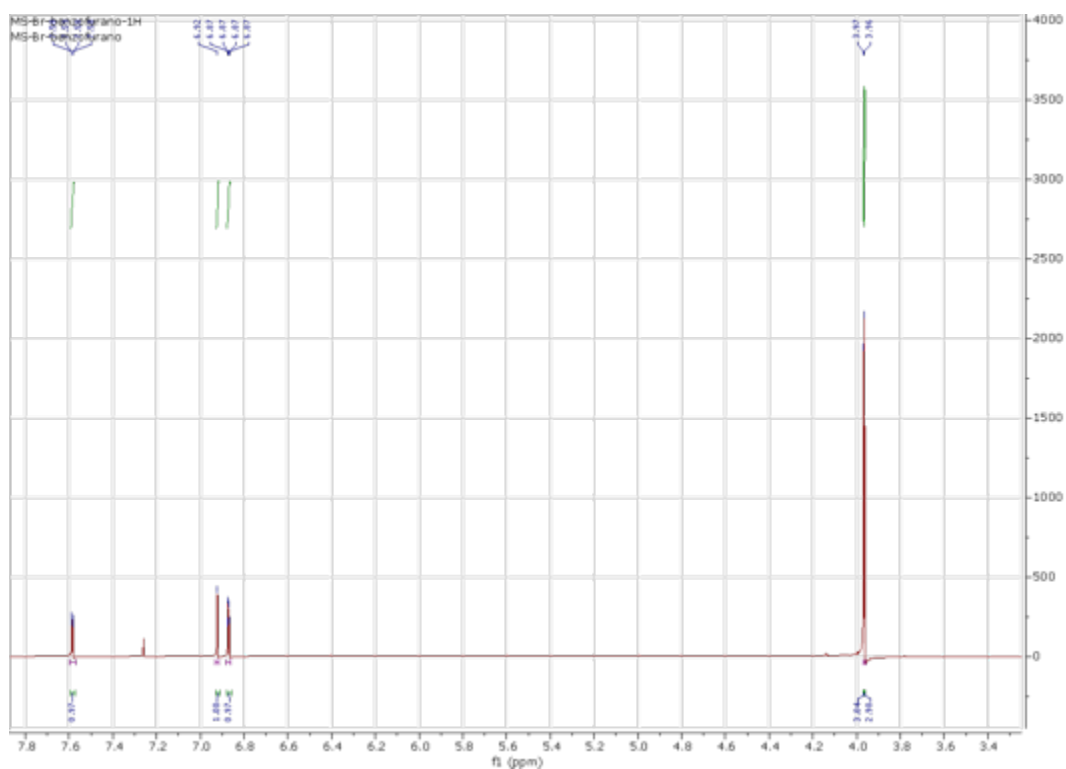

$^1\text{H}$  NMR (400 MHz, Chloroform- $d$ )  $\delta$  7.59 (dd,  $J = 2.2, 0.5$  Hz, 1H), 6.92 (s, 1H), 6.87 (dd,  $J = 2.1, 0.4$  Hz, 1H), 3.97 (d,  $J = 1.7$  Hz, 6H).

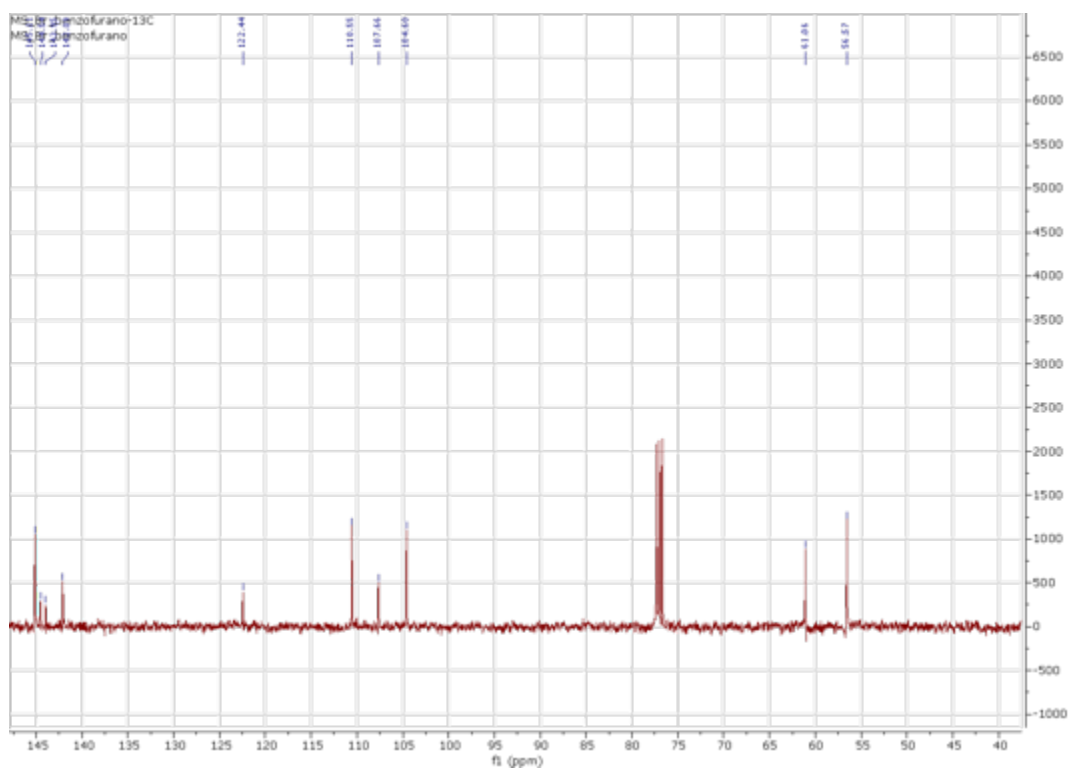

$^{13}\text{C}$  NMR (101 MHz, Chloroform- $d$ )  $\delta$  145.11, 144.54, 143.95, 142.09, 122.44, 110.55, 107.66, 104.60, 61.06, 56.57.

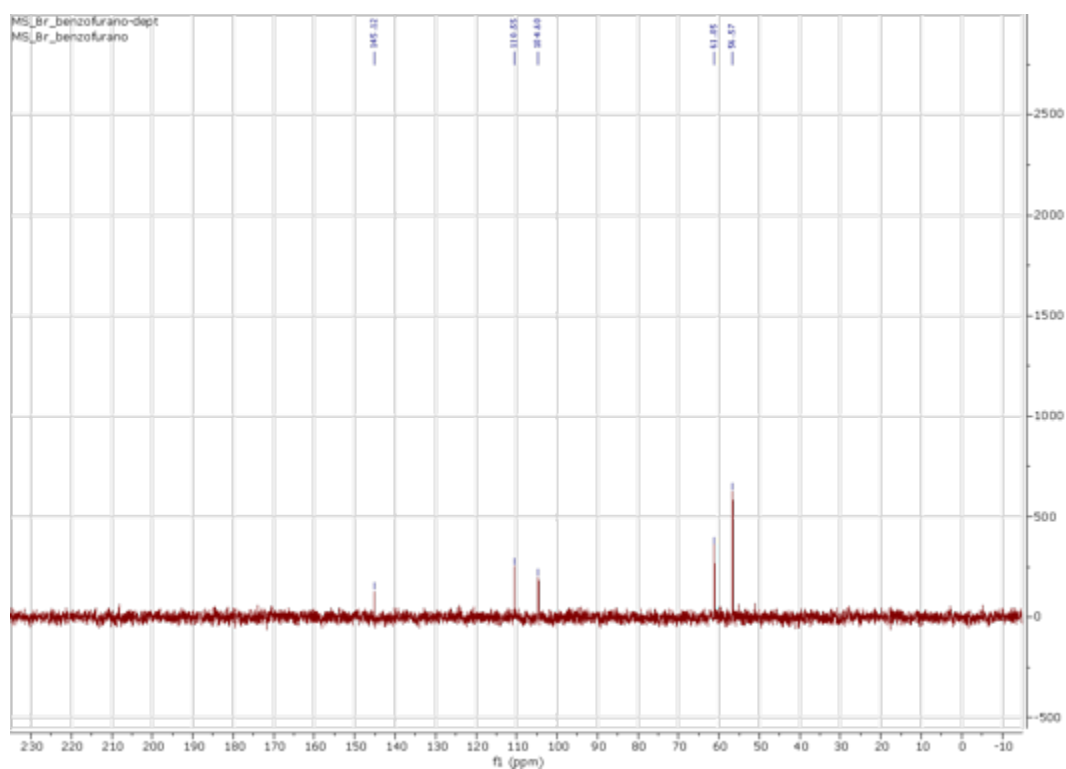

$^{13}\text{C}$  NMR (101 MHz, Chloroform-d)  $\delta$  145.12, 110.55, 104.60, 61.05, 56.57.

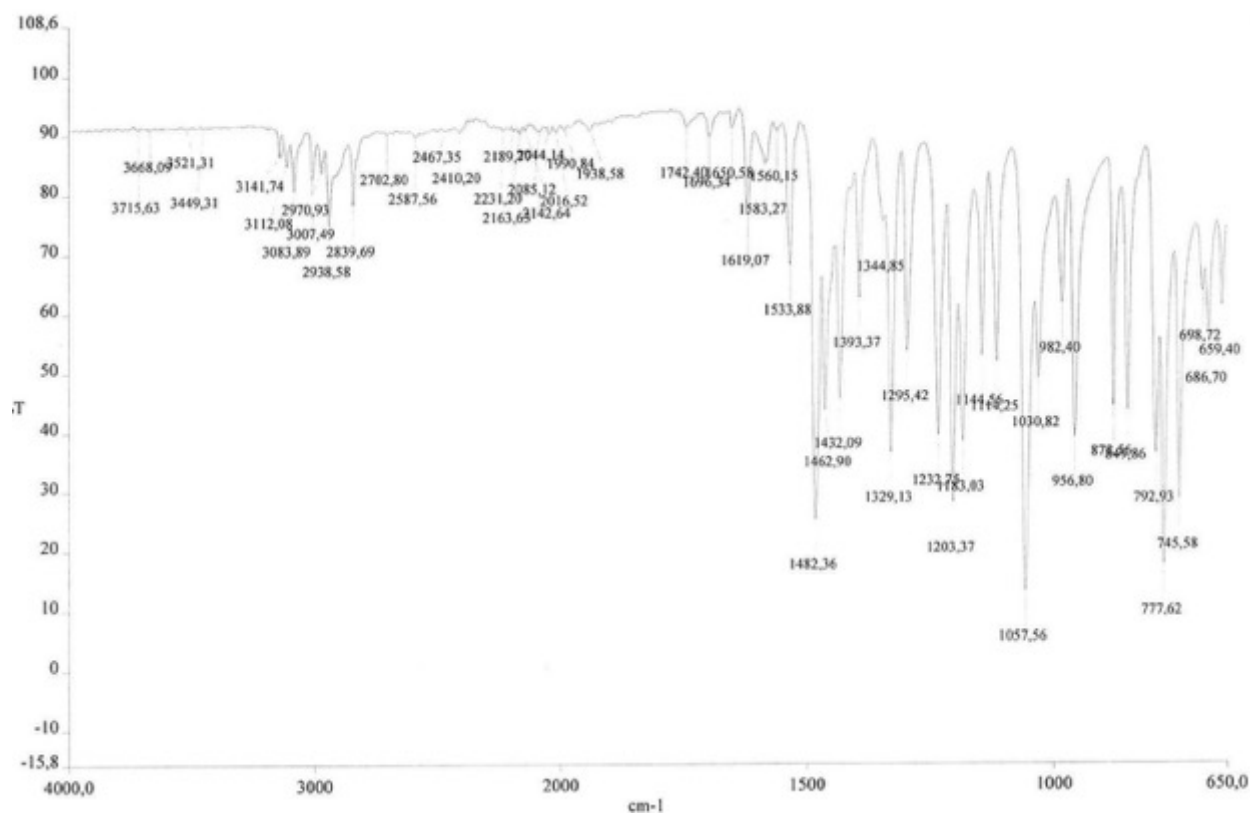

# 1-phenylprop-2-en-1-one (13)

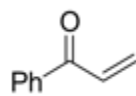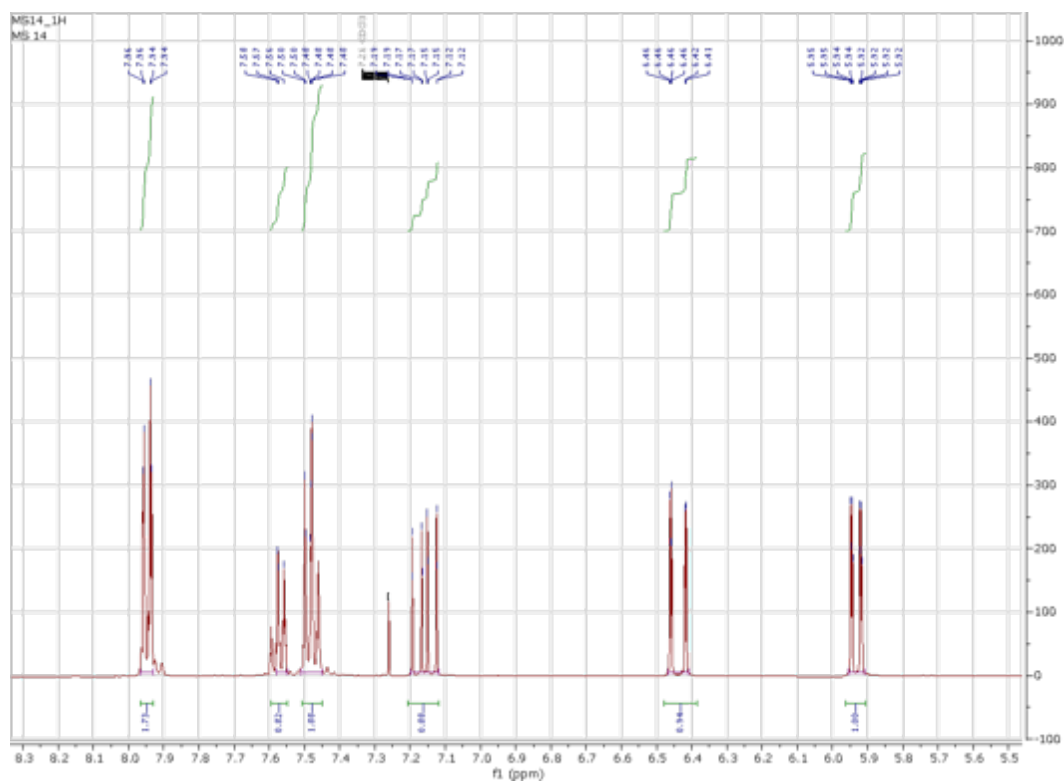

<sup>1</sup>H NMR (400 MHz, Chloroform-d)  $\delta$  7.97 – 7.93 (m, 2H), 7.58 – 7.55 (m, 1H), 7.51 – 7.45 (m, 2H), 7.16 (ddd,  $J$  = 17.2, 10.6, 0.6 Hz, 1H), 6.44 (dd,  $J$  = 17.2, 1.7 Hz, 1H), 5.95 – 5.91 (m, 1H).

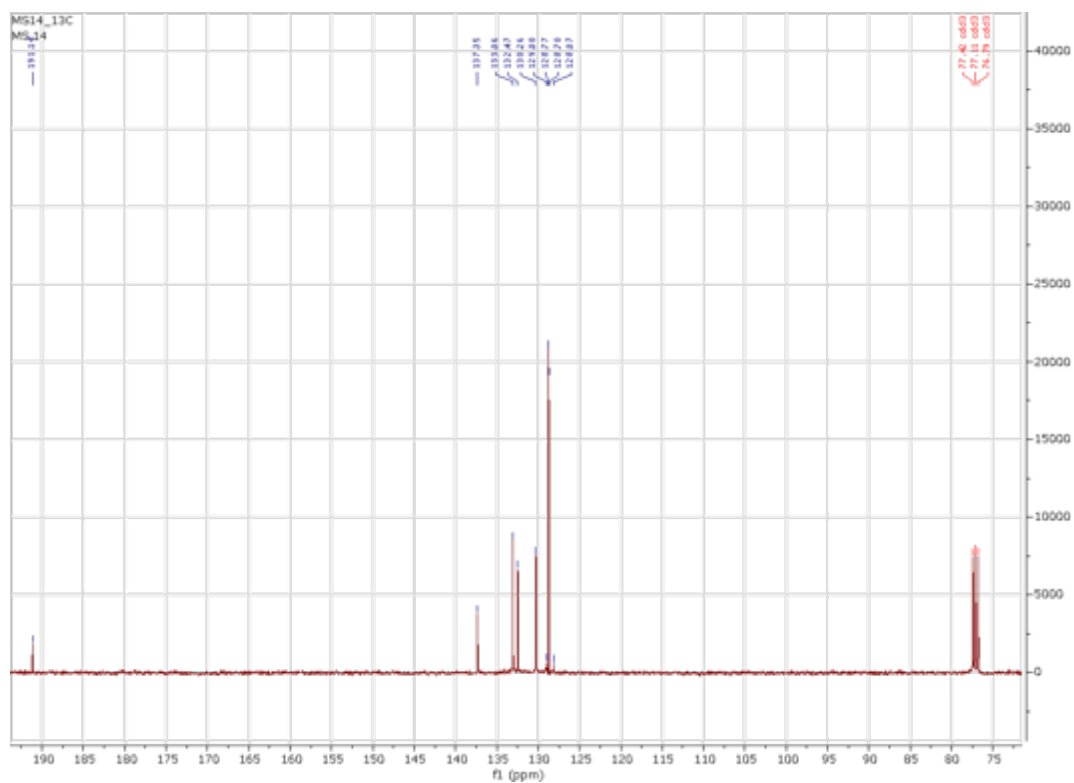

$^{13}\text{C}$  NMR (101 MHz, Chloroform-d)  $\delta$  191.14, 137.35, 133.06, 132.47, 130.26, 129.00, 128.77, 128.70, 128.07.

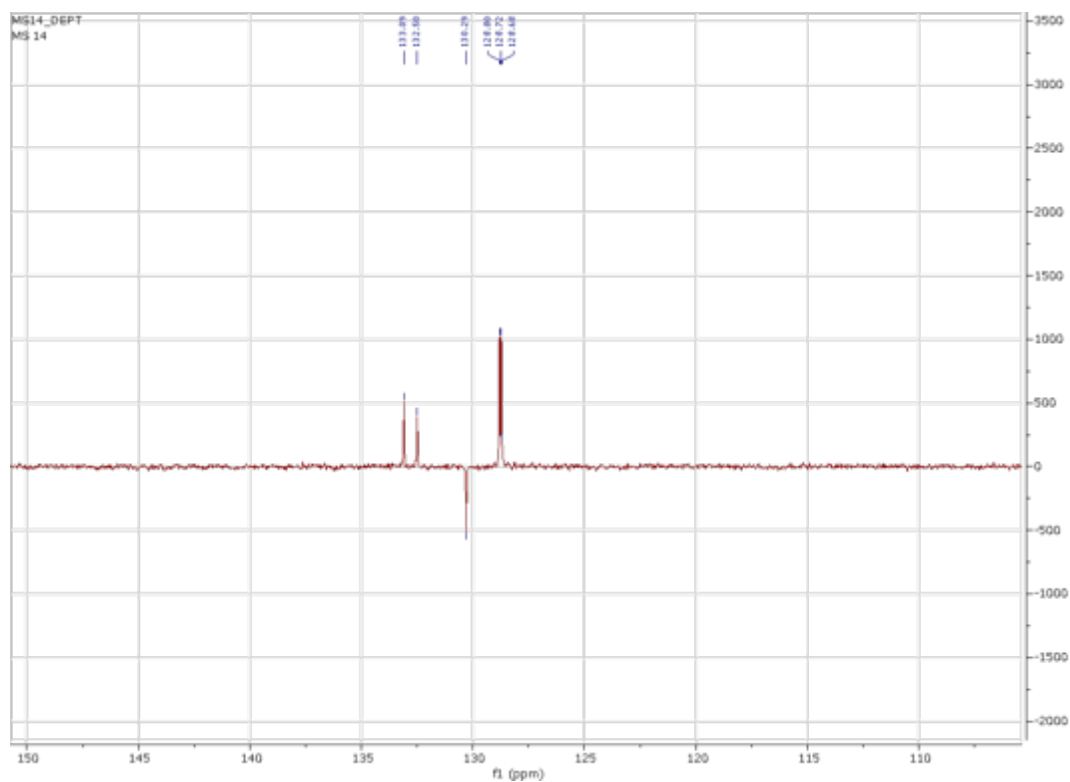

$^{13}\text{C}$  NMR (101 MHz, Chloroform-d)  $\delta$  133.09, 132.50, 130.29, 128.80, 128.72, 128.68.

## 2-(2,5-dimethoxyphenoxy)tetrahydro-2H-pyran (14)

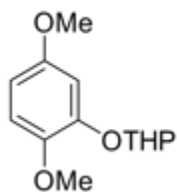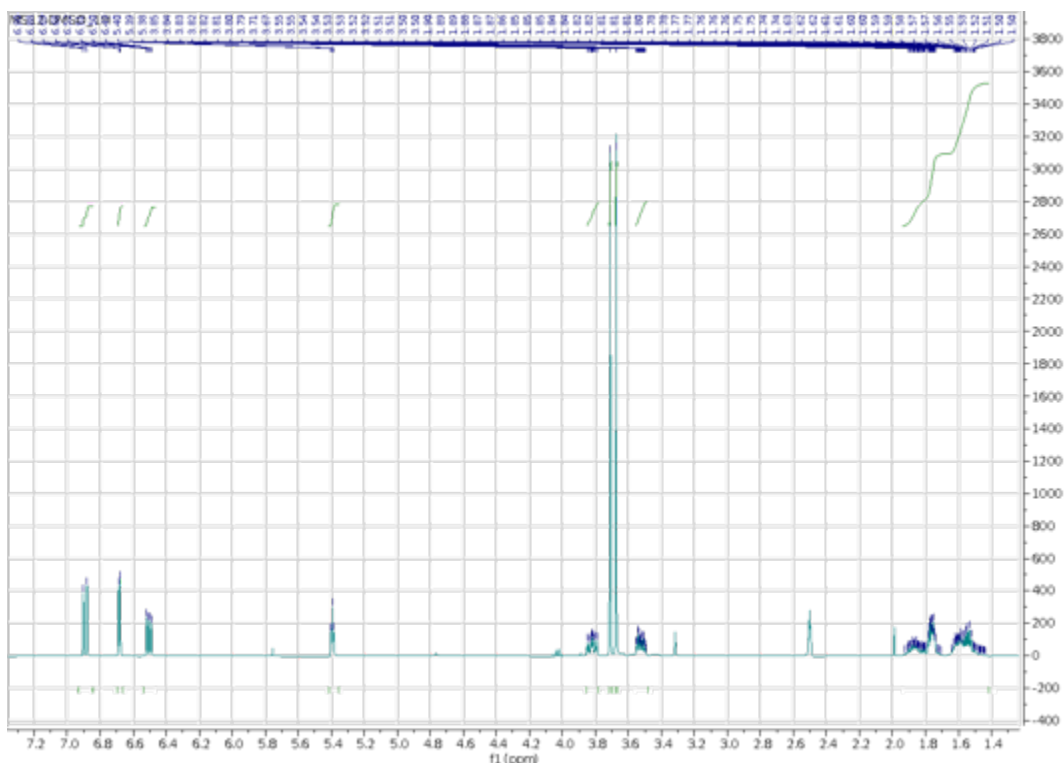

$^1\text{H}$  NMR (400 MHz,  $\text{dmsO}$ )  $\delta$  6.89 (d,  $J = 8.8$  Hz, 1H), 6.68 (d,  $J = 2.9$  Hz, 1H), 6.50 (dd,  $J = 8.9, 2.9$  Hz, 1H), 5.39 (t,  $J = 3.3$  Hz, 1H), 3.82 (ddd,  $J = 11.1, 8.9, 3.8$  Hz, 1H), 3.71 (s, 3H), 3.67 (s, 3H), 3.53 (dtd,  $J = 11.5, 4.3, 1.2$  Hz, 1H), 1.94 – 1.38 (m, 7H).

## 2-hydroxy-3,6-dimethoxybenzaldehyde (15)

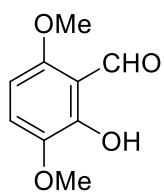



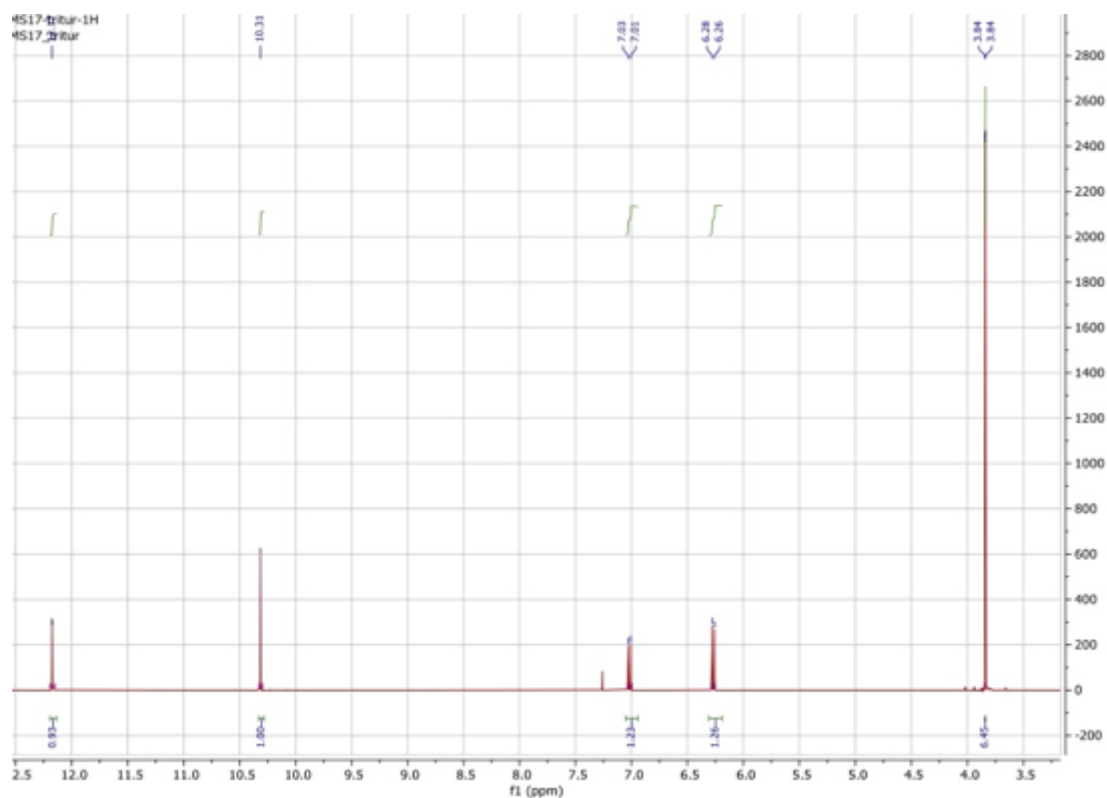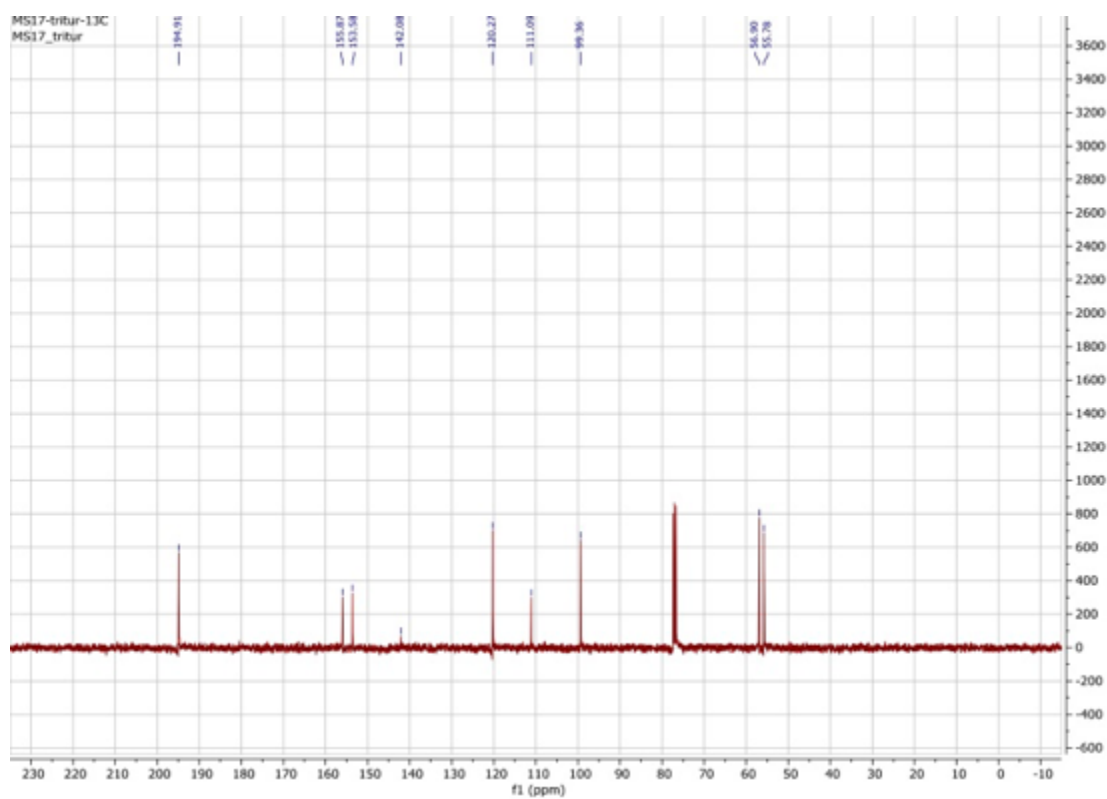

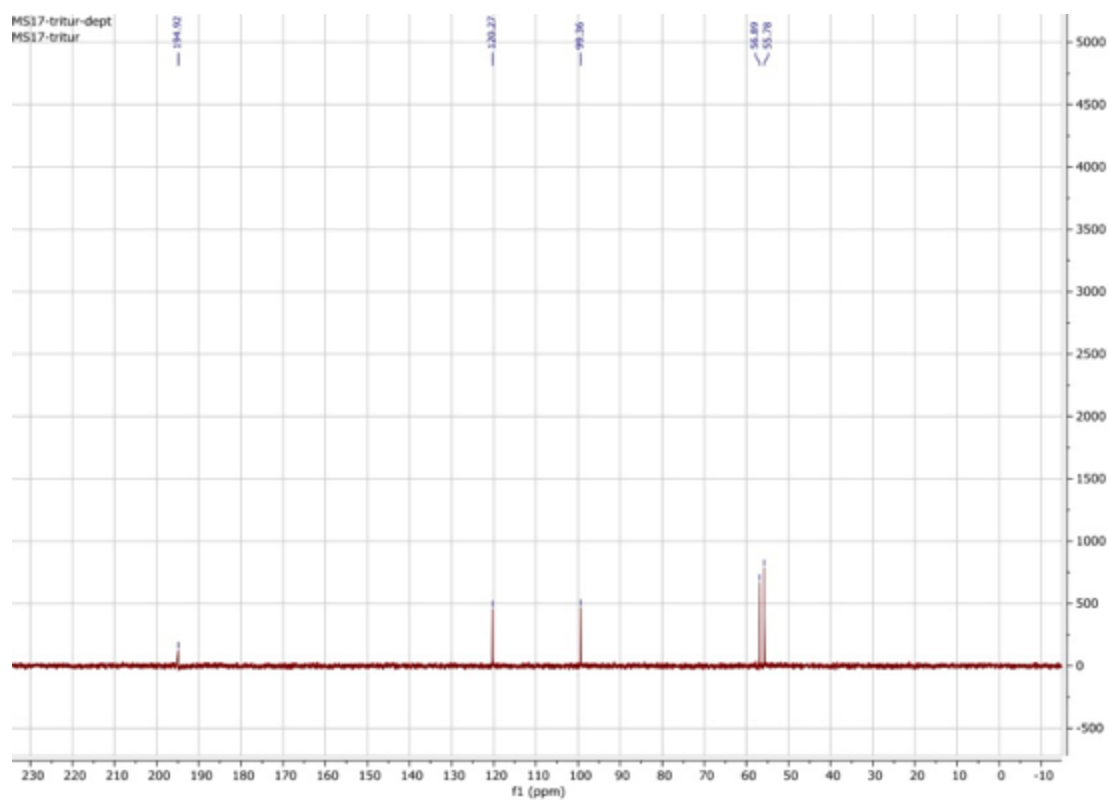

$^{13}\text{C}$  NMR (101 MHz, Chloroform-d)  $\delta$  194.92, 120.27, 99.36, 56.89, 55.78.

### 3-bromo-6-hydroxy-2,5-dimethoxybenzaldehyde (**16**)

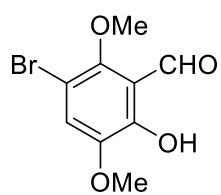

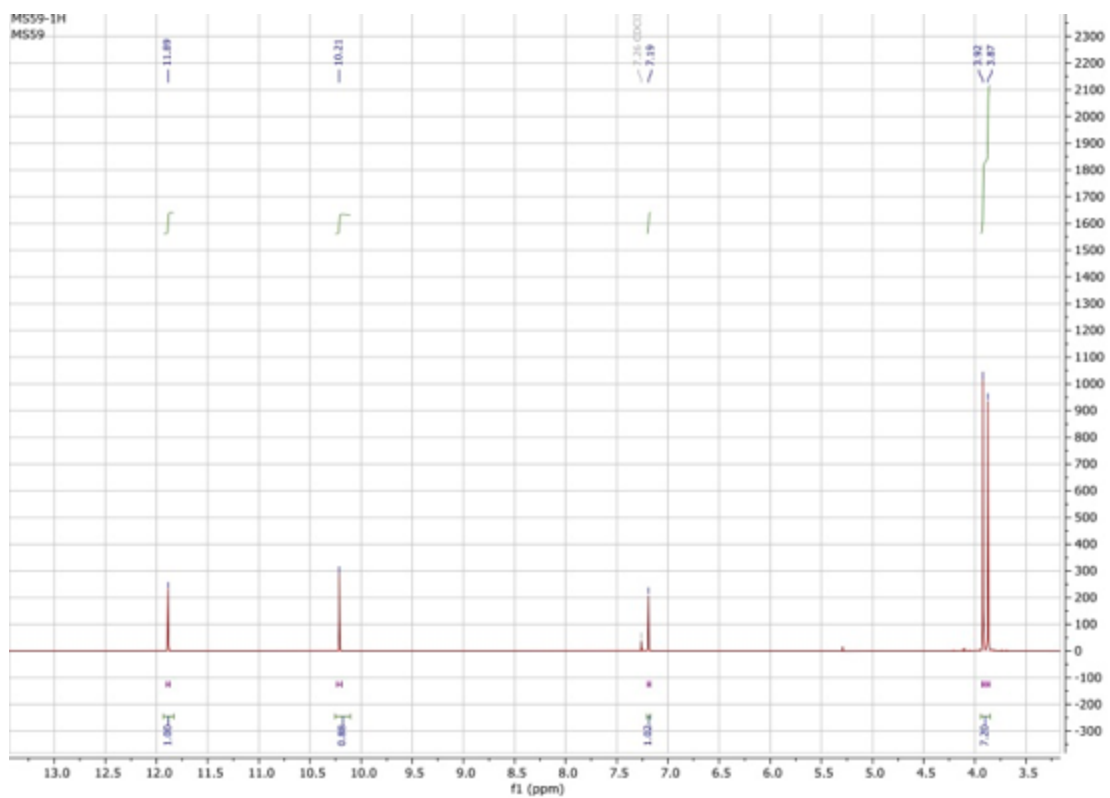

<sup>1</sup>H NMR (400 MHz, Chloroform-*d*)  $\delta$  11.89 (s, 1H), 10.21 (s, 1H), 7.19 (s, 1H), 3.92 (s, 3H), 3.87 (s, 3H).

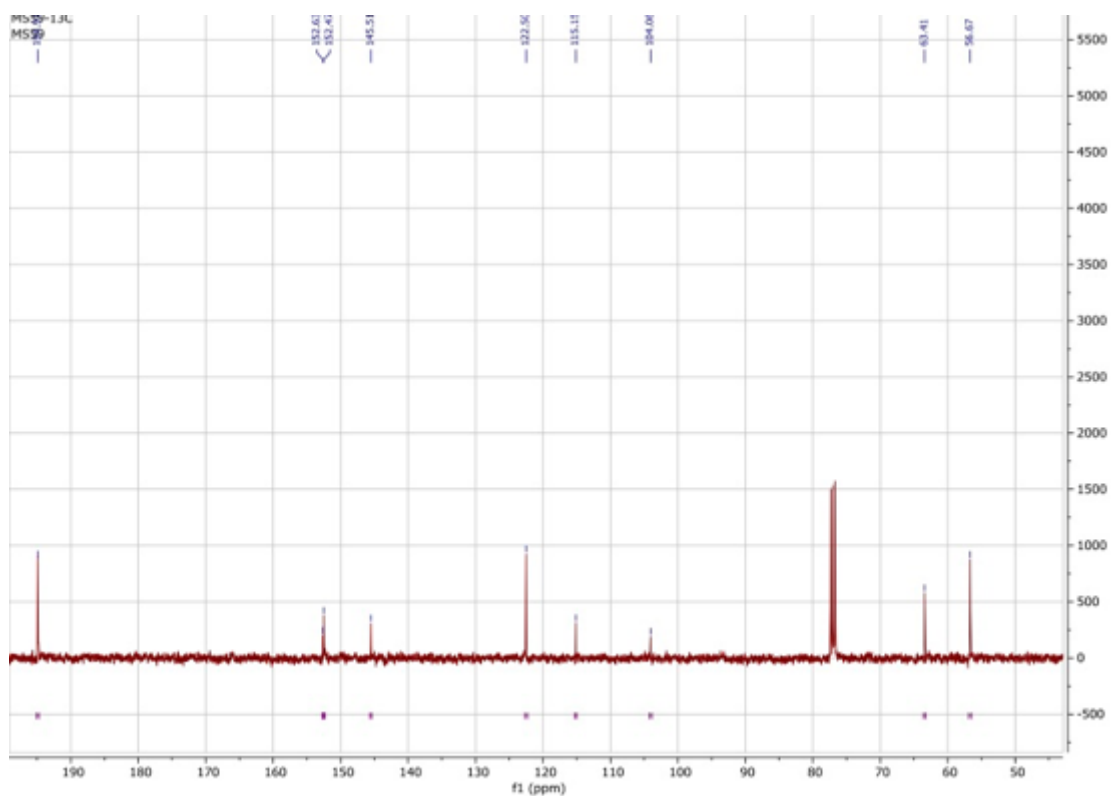

<sup>13</sup>C NMR (101 MHz, Chloroform-*d*)  $\delta$  194.91, 152.63, 152.47, 145.51, 122.50, 115.15, 104.06, 63.41, 56.67.

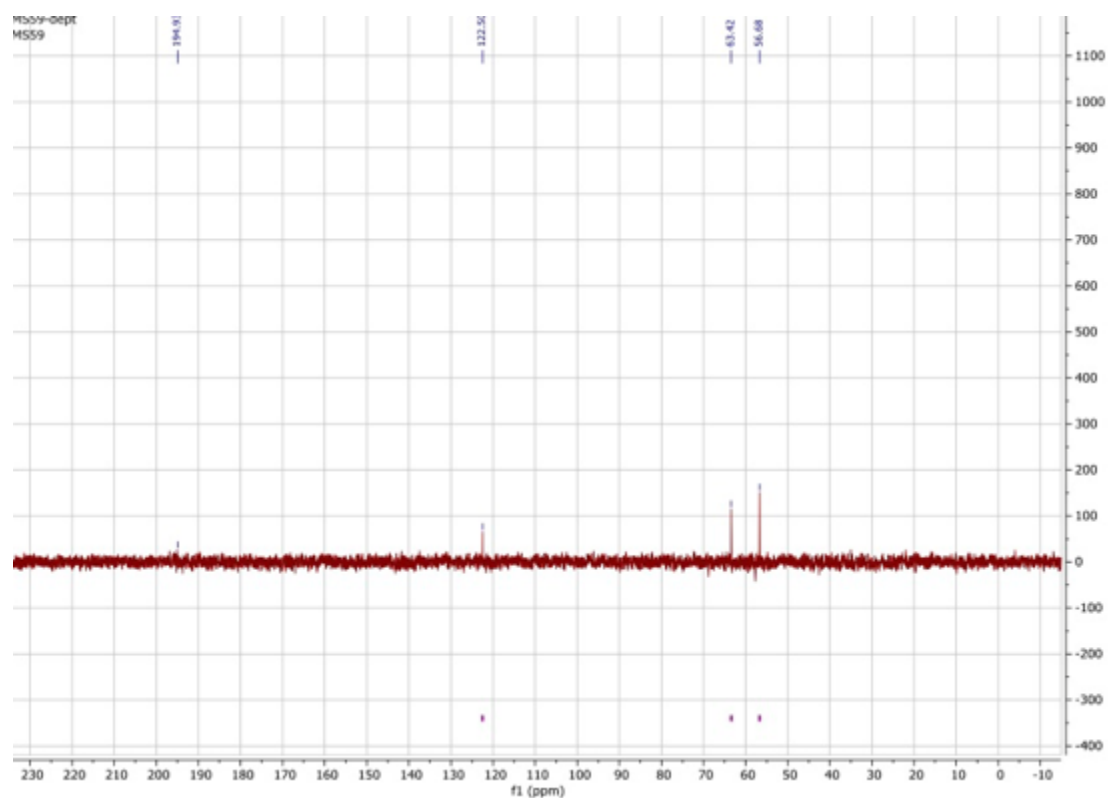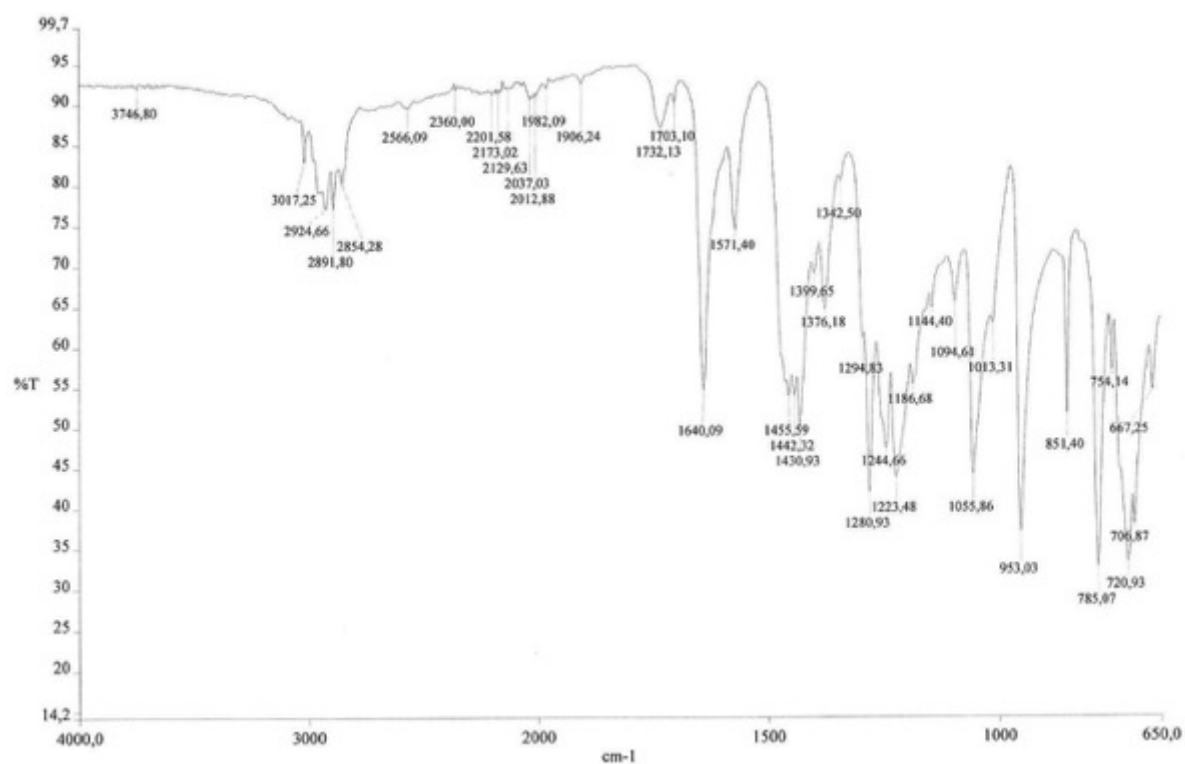

ethyl 2-(4-bromo-2-formyl-3,6-dimethoxyphenoxy)acetate (**17**)

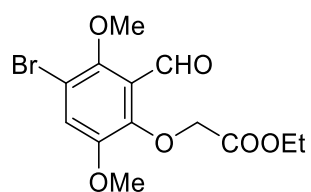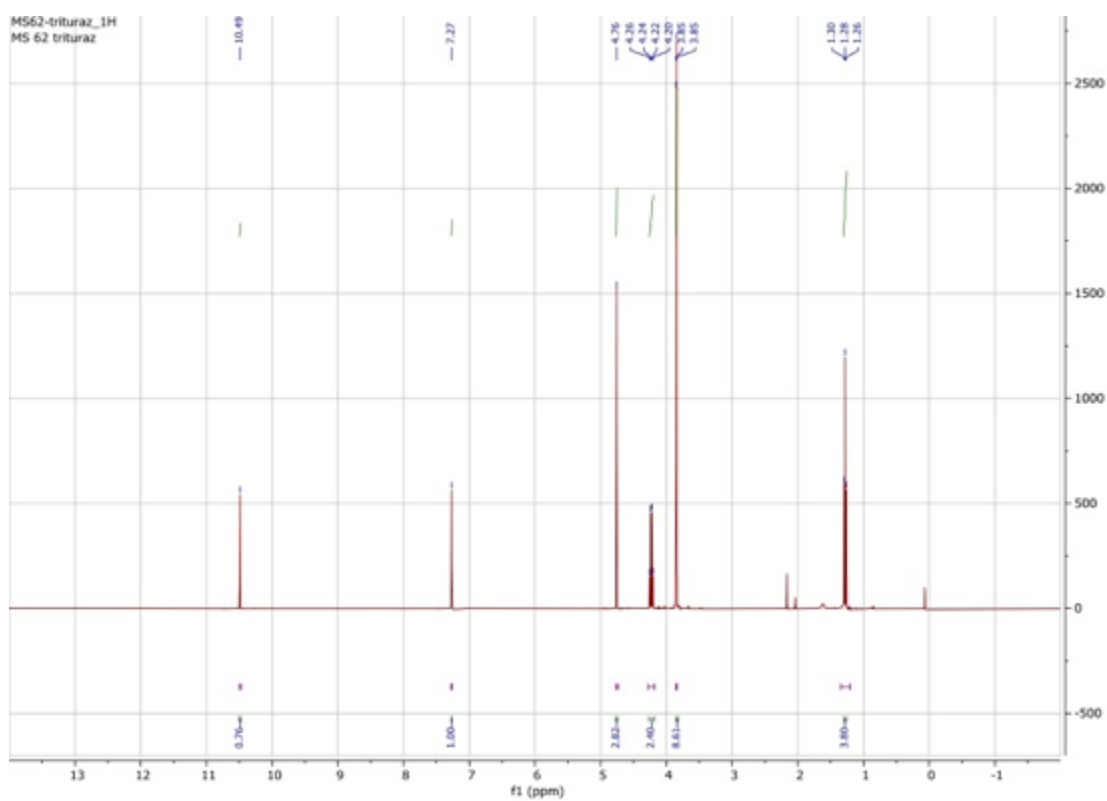

$^1\text{H}$  NMR (400 MHz, Chloroform- $d$ )  $\delta$  10.49 (s, 1H), 7.27 (s, 1H), 4.76 (s, 2H), 4.23 (q,  $J = 7.1$  Hz, 2H), 3.85 (d,  $J = 2.1$  Hz, 6H), 1.28 (t,  $J = 7.1$  Hz, 3H).

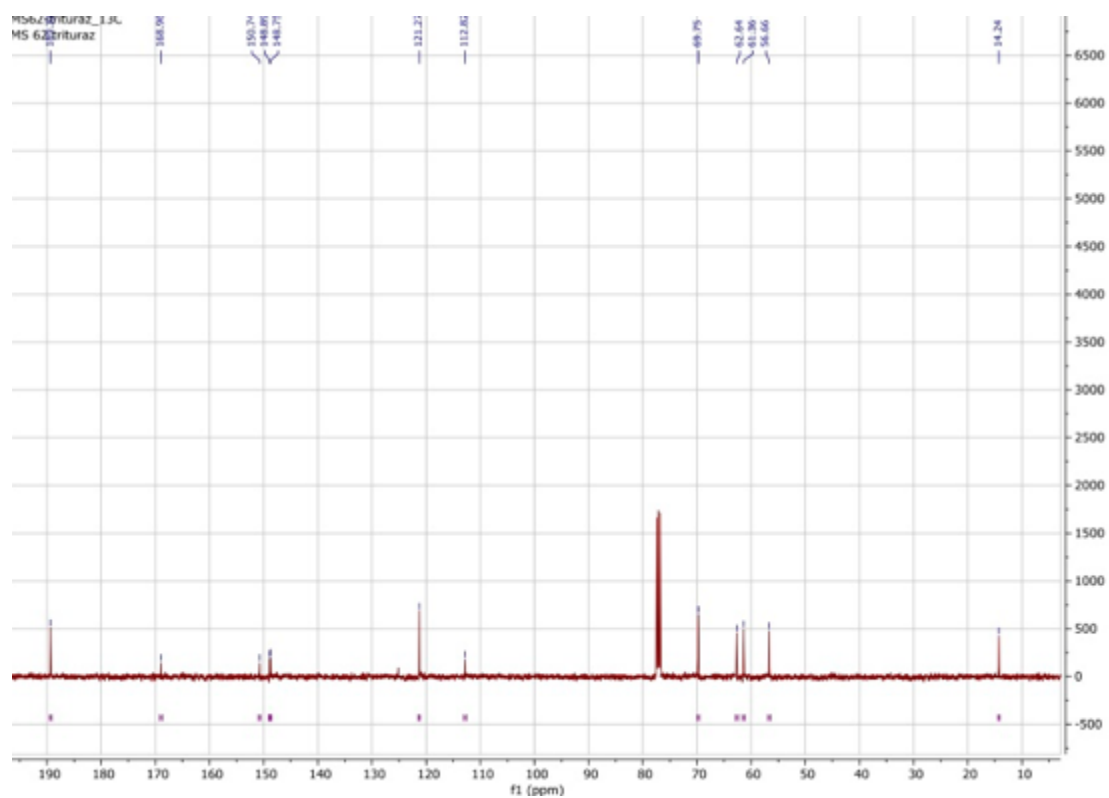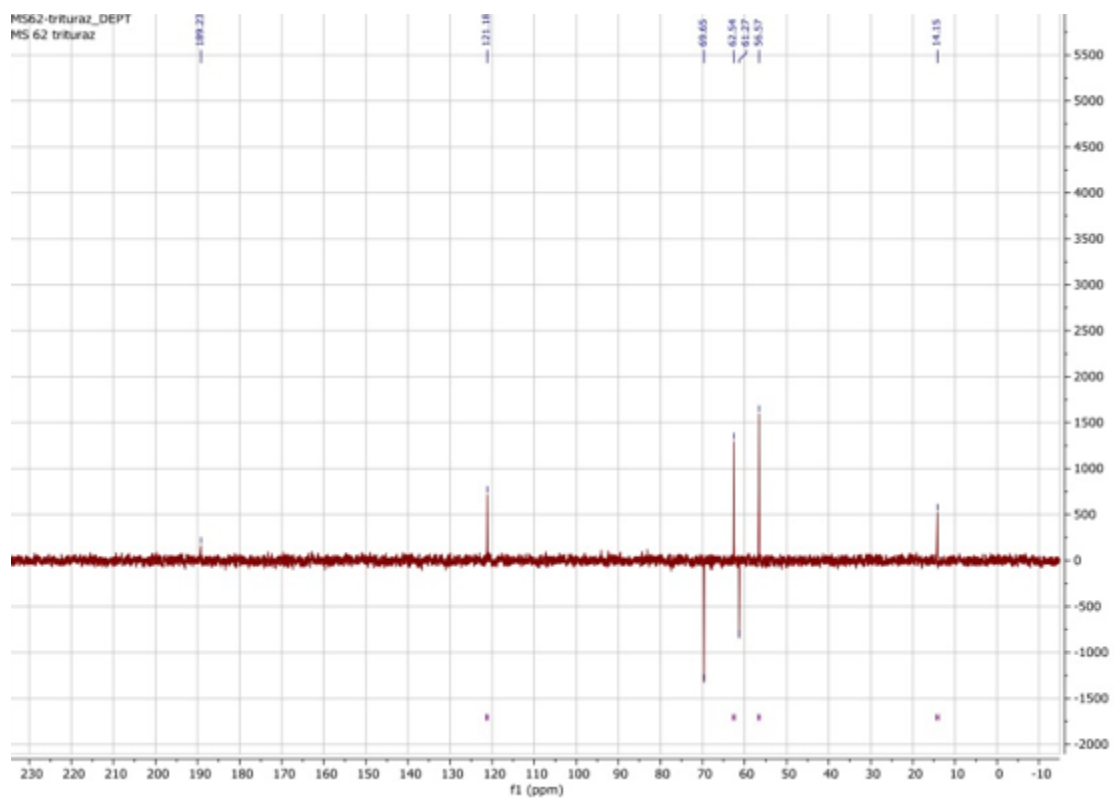

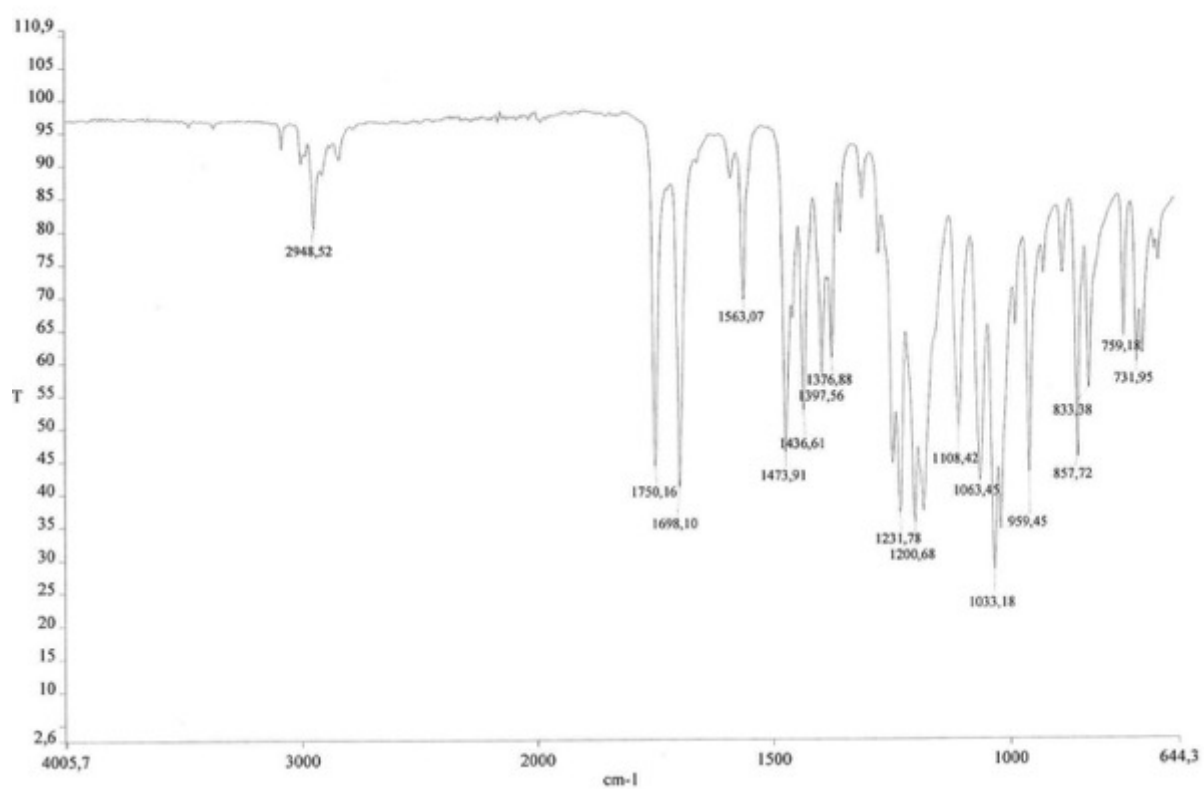

## 2-(3-bromo-6-formyl-2,5-dimethoxyphenoxy)acetic acid

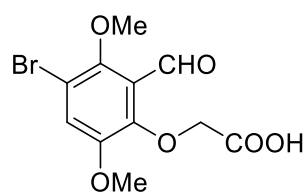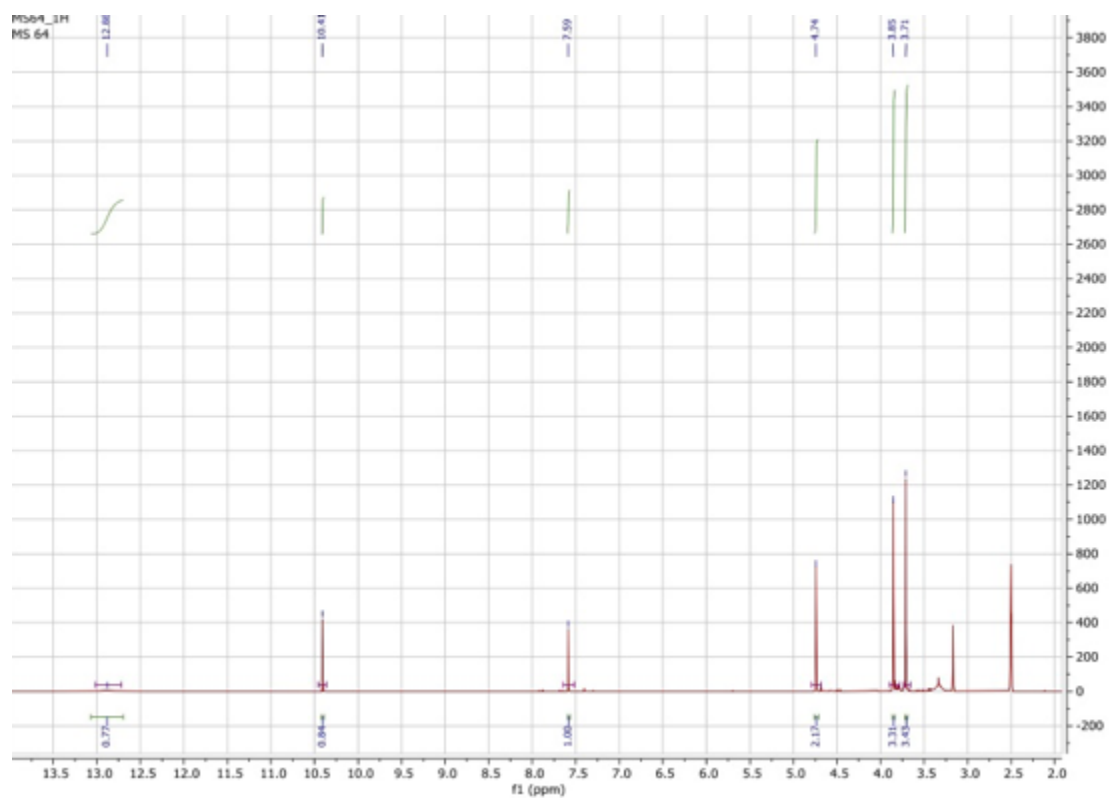

<sup>1</sup>H NMR (400 MHz, DMSO-*d*<sub>6</sub>) δ 12.88 (s, 1H), 10.41 (s, 1H), 7.59 (s, 1H), 4.74 (s, 2H), 3.85 (s, 3H), 3.71 (s, 3H).



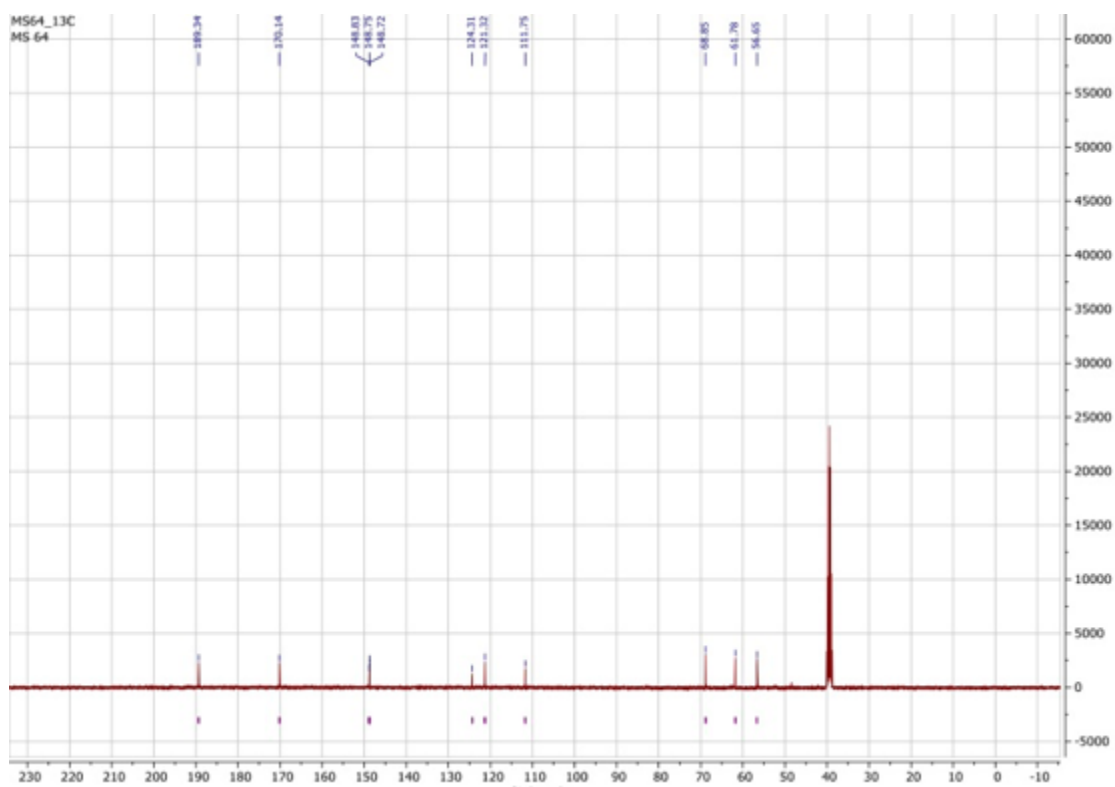

$^{13}\text{C}$  NMR (101 MHz, dmso)  $\delta$  189.34, 170.14, 148.83, 148.75, 148.72, 124.31, 121.32, 111.75, 68.85, 61.78, 56.65.

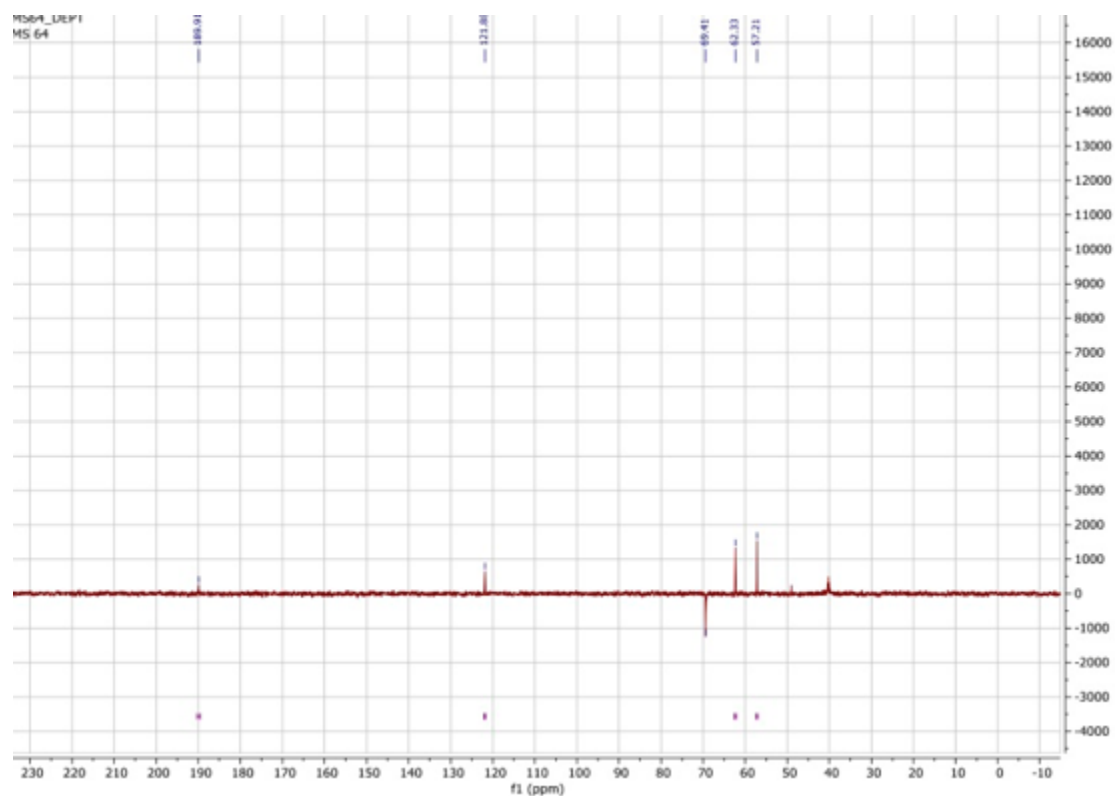

$^{13}\text{C}$  NMR (101 MHz, dmso)  $\delta$  189.91, 121.88, 69.41, 62.33, 57.21.

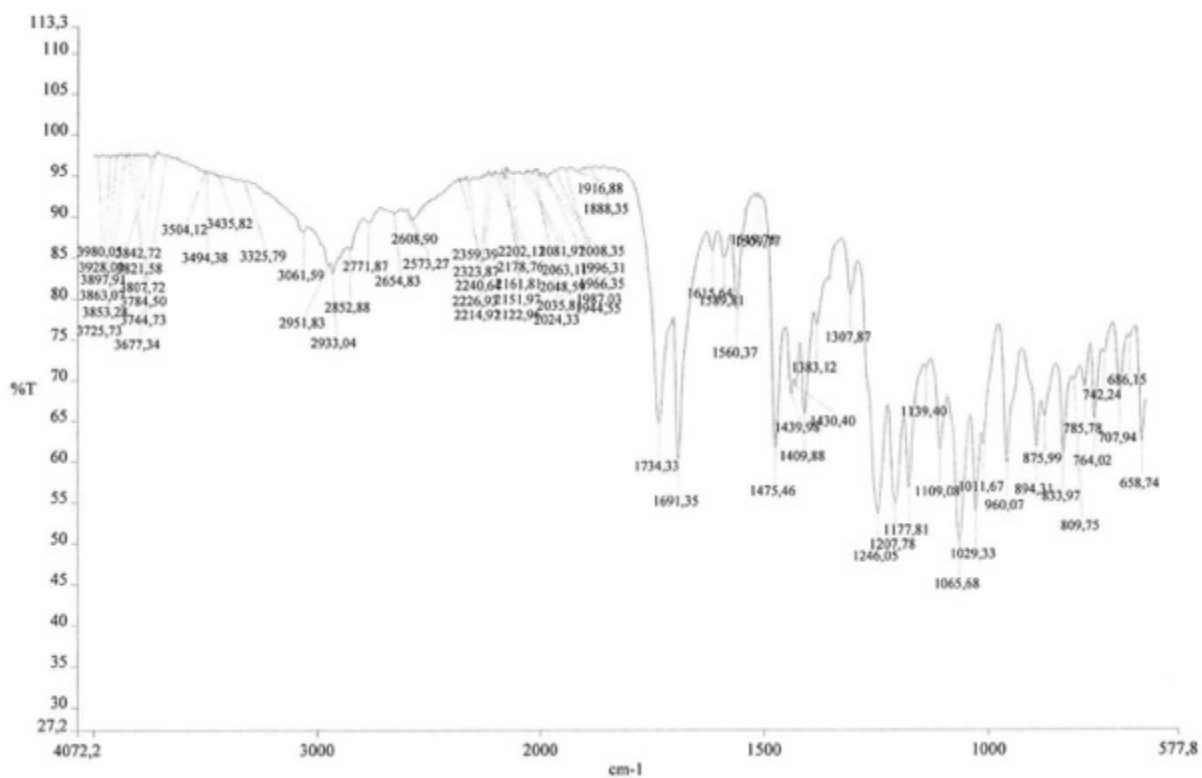

(E)-3-(4,7-dimethoxybenzofuran-5-yl)-1-phenylprop-2-en-1-one (**1**)

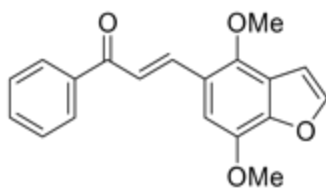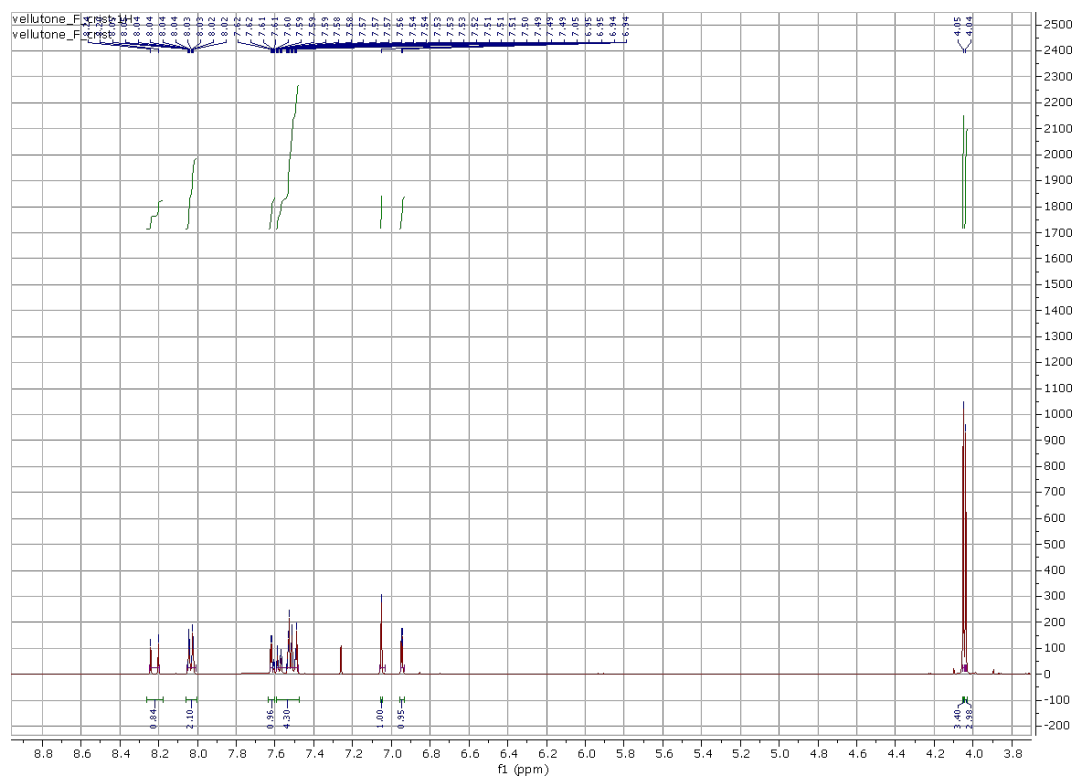

$^1\text{H}$  NMR (400 MHz, Chloroform-*d*)  $\delta$  8.22 (d,  $J$  = 15.8 Hz, 1H), 8.05 – 8.01 (m, 2H), 7.62 (d,  $J$  = 2.2 Hz, 1H), 7.59 – 7.48 (m, 4H), 7.05 (s, 1H), 6.95 (dd,  $J$  = 2.2, 0.6 Hz, 1H), 4.05 (s, 3H), 4.04 (s, 3H).

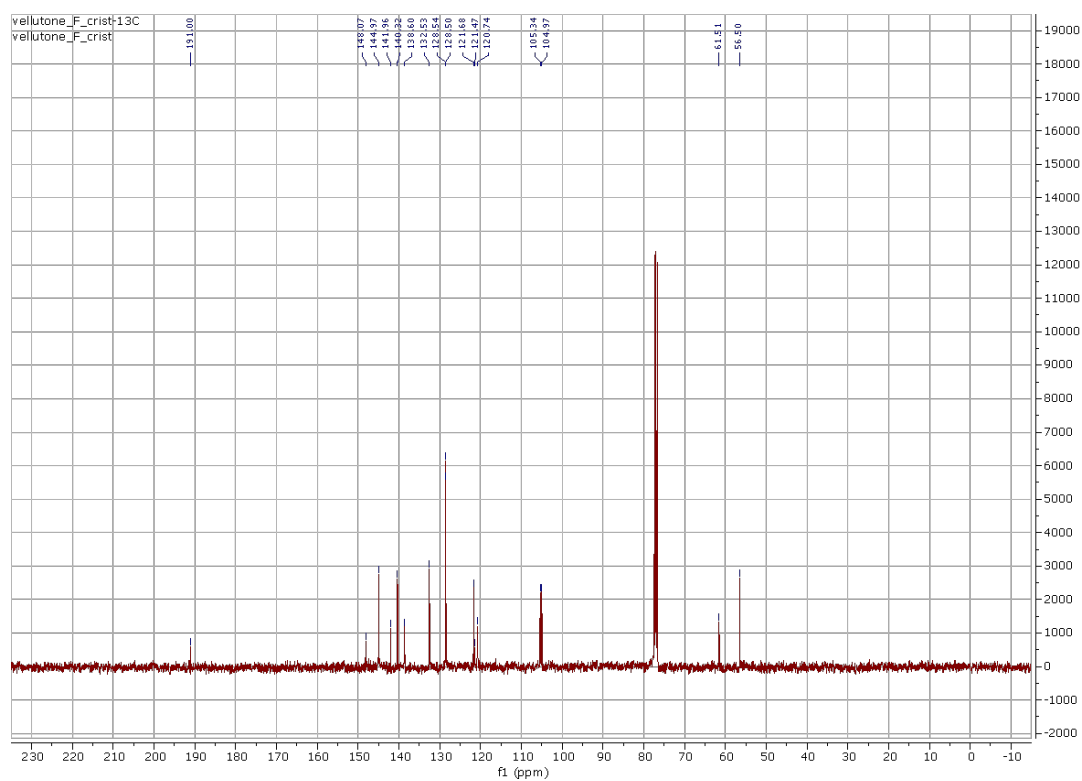

$^{13}\text{C}$  NMR (101 MHz, Chloroform-d)  $\delta$  191.00, 148.07, 144.97, 141.96, 140.32, 138.60, 132.53, 128.54, 128.50, 121.68, 121.47, 120.74, 105.34, 104.97, 61.51, 56.50.

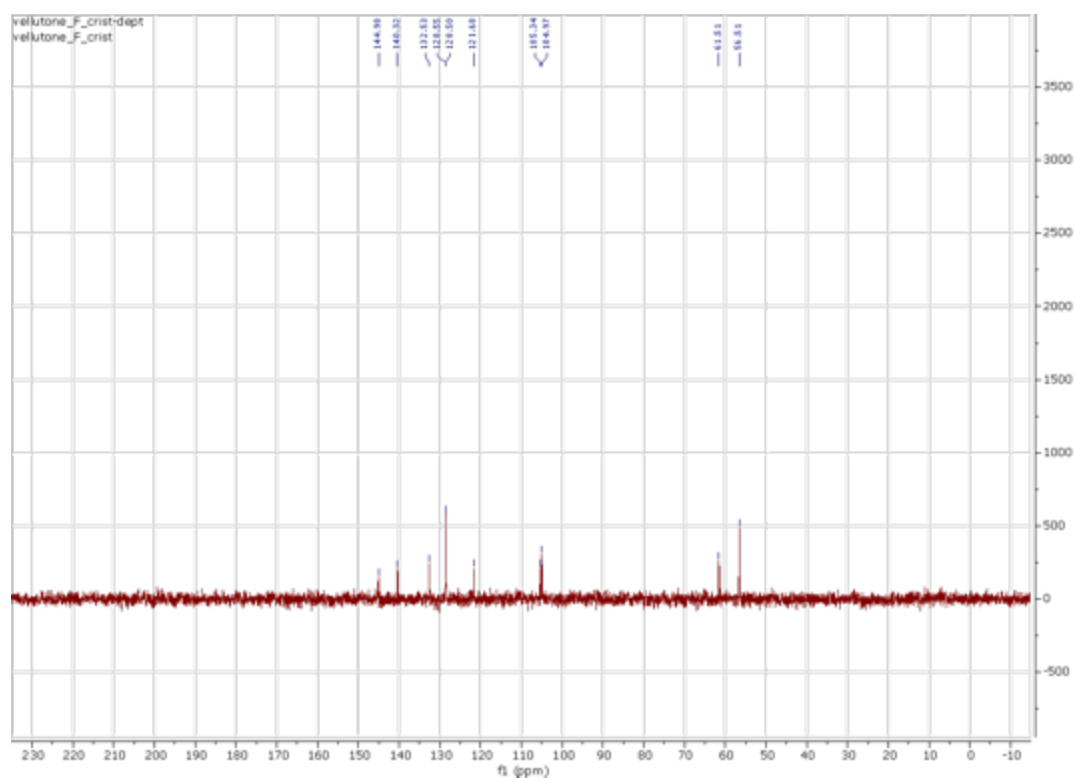

$^{13}\text{C}$  NMR (101 MHz, Chloroform-d)  $\delta$  144.98, 140.32, 132.53, 128.55, 128.50, 121.68, 105.34, 104.97, 61.51, 56.51.

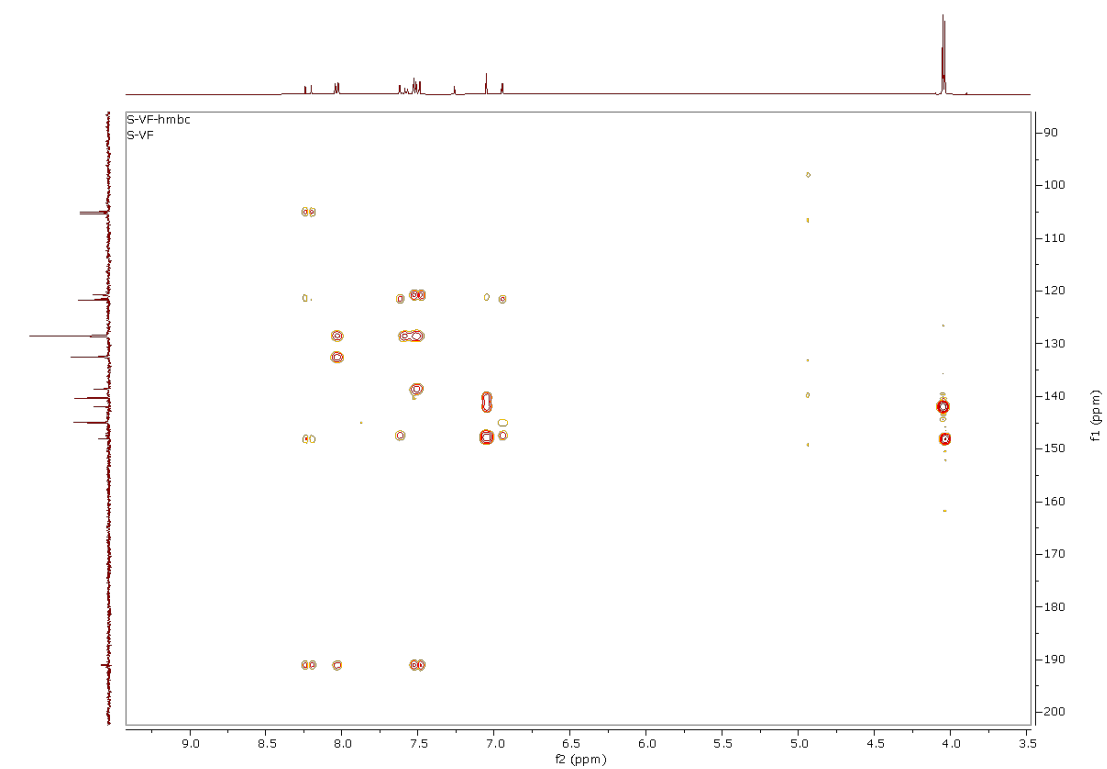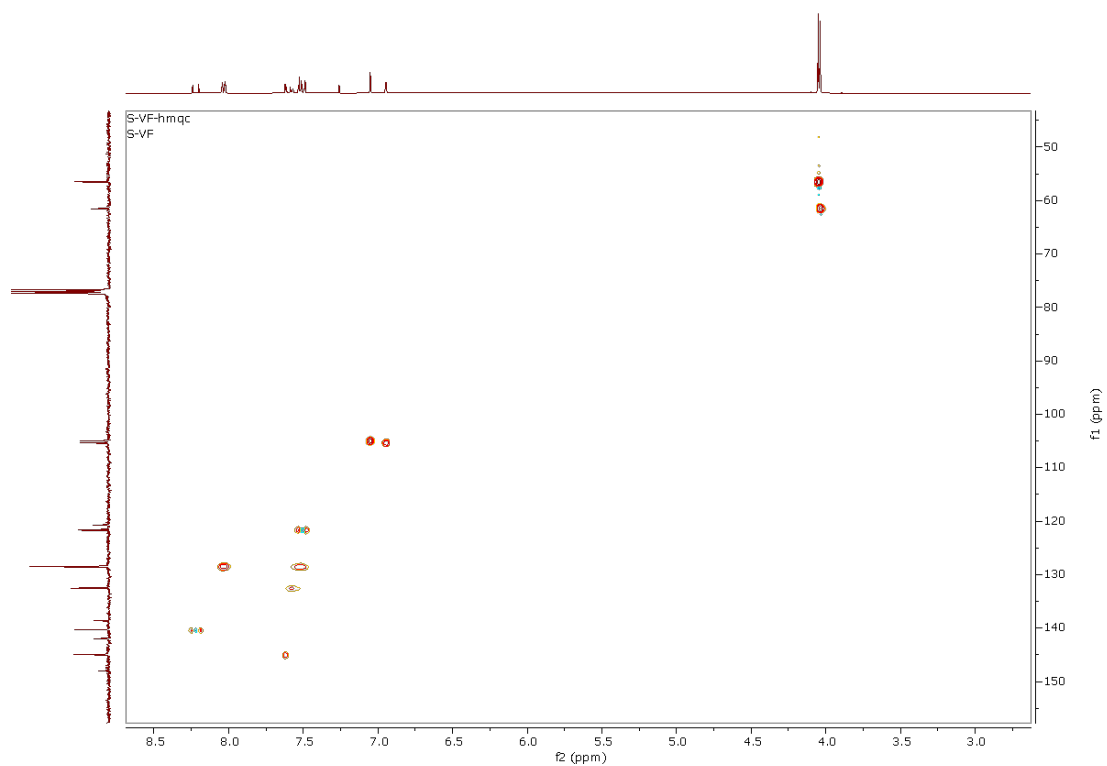

## Area % Report

Data File: C:\32Karat\Projects\Default\Data\delia\Martina\vellutone F.dat  
 Method: C:\32Karat\Projects\Default\Method\standard 0.7 ml.met

Acquired: 05/05/2021 17.37.21  
Printed: 04/08/2022 13.15.03

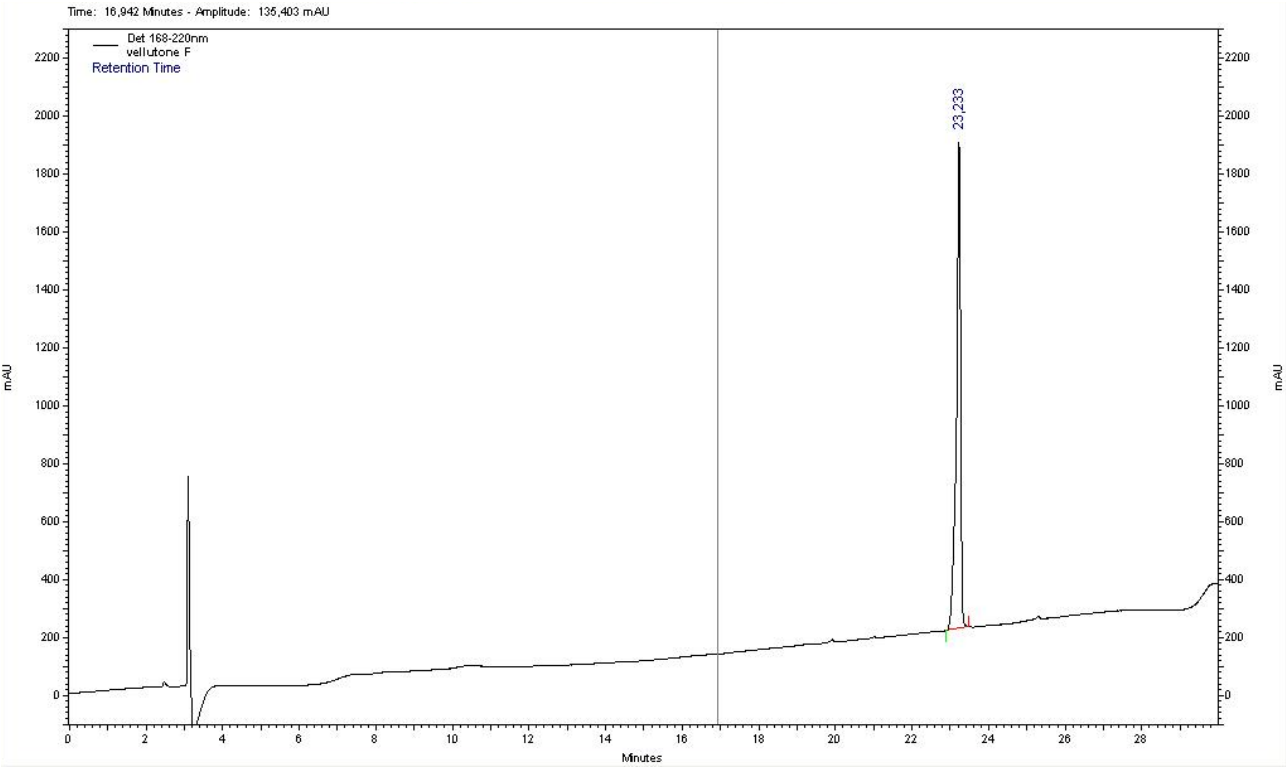

**Det 168-220nm**  
**Results**

| Time   | Area     | Area % | Height  | Height % |
|--------|----------|--------|---------|----------|
| 23,233 | 12840863 | 100,00 | 1677712 | 100,00   |
| Totals | 12840863 | 100,00 | 1677712 | 100,00   |

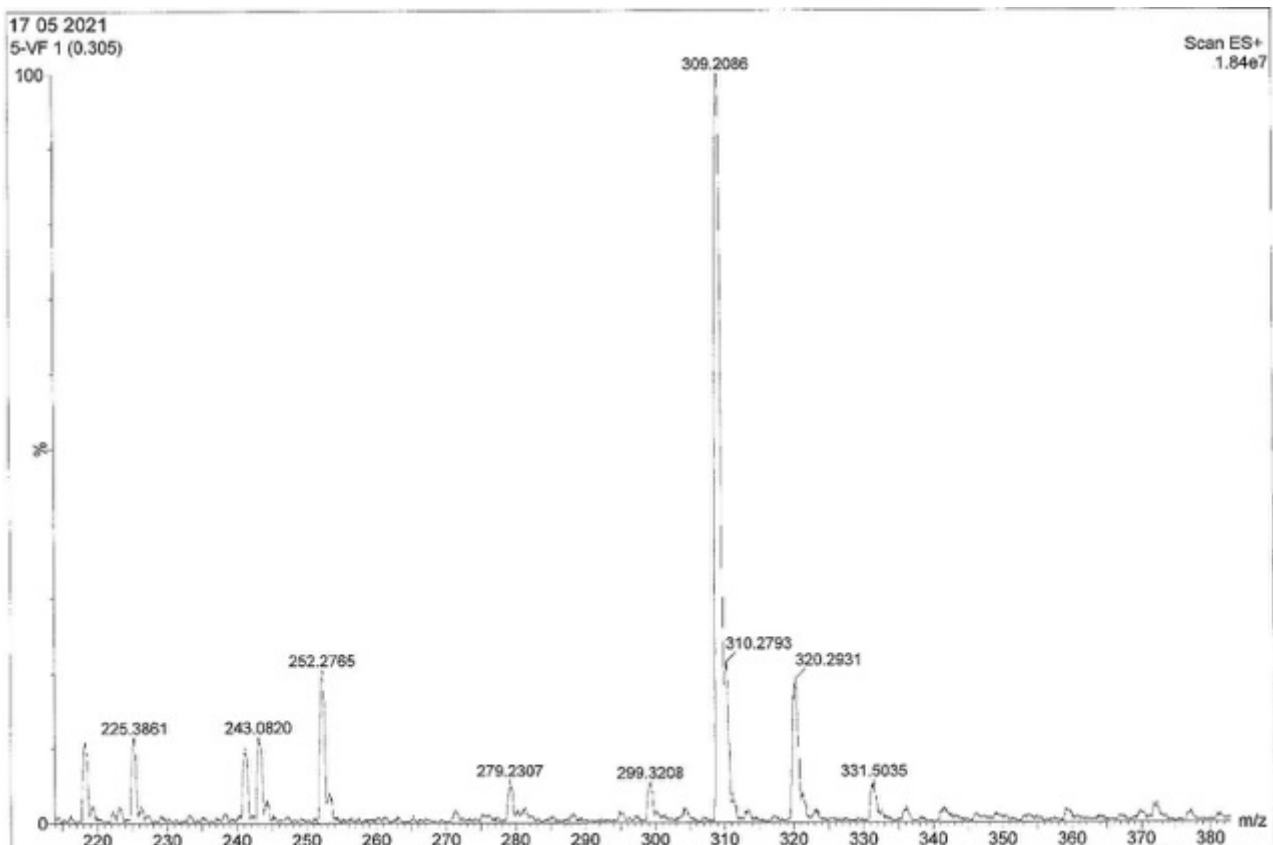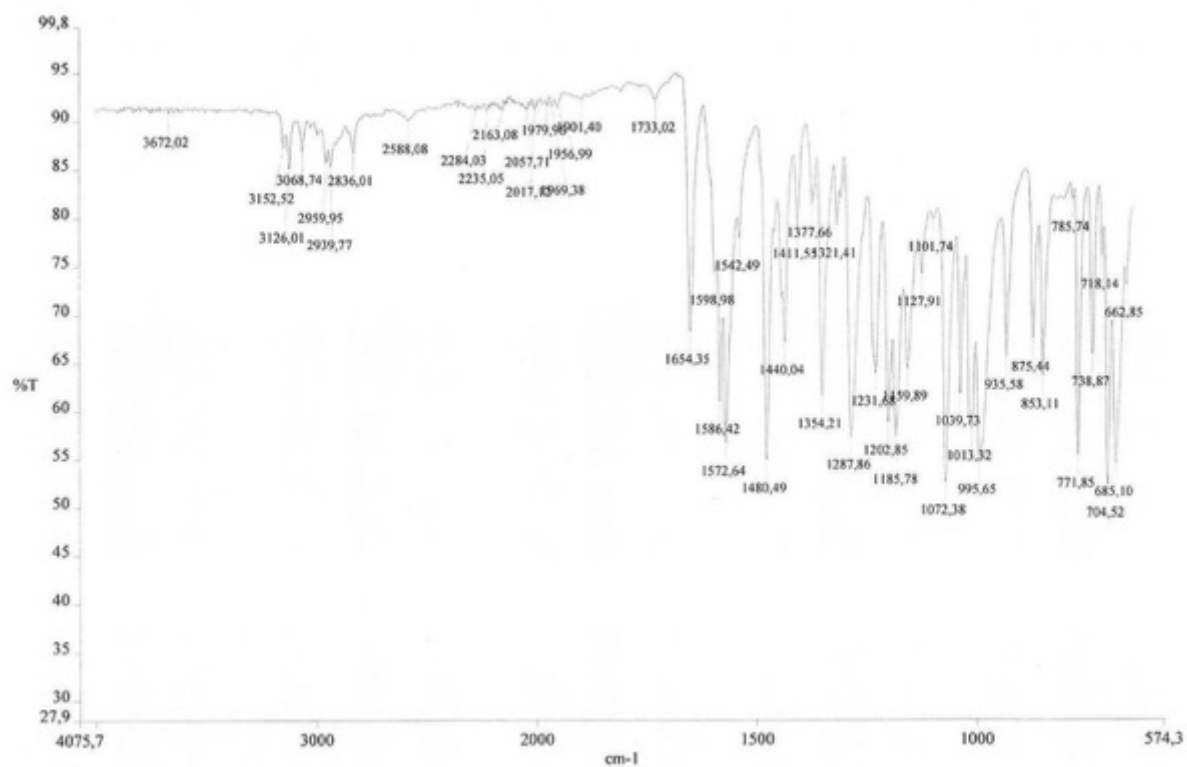

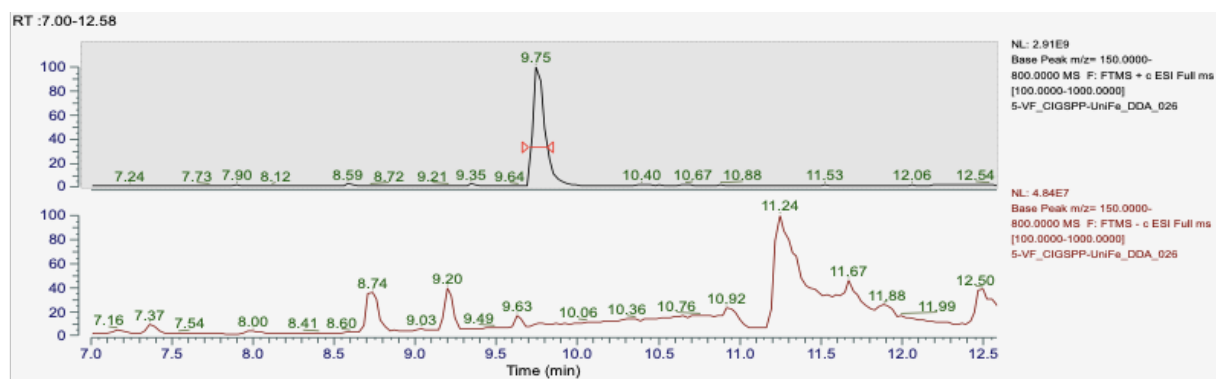

5-VF\_CIGSPP-UniFe\_DDA\_026 #2089-2113 RT: 9.7-9.81 AV: 4 SB: 6 9.50-9.65 NL: 2.01E+009  
T: FTMS + c ESI Full ms [100.0000-1000.0000]

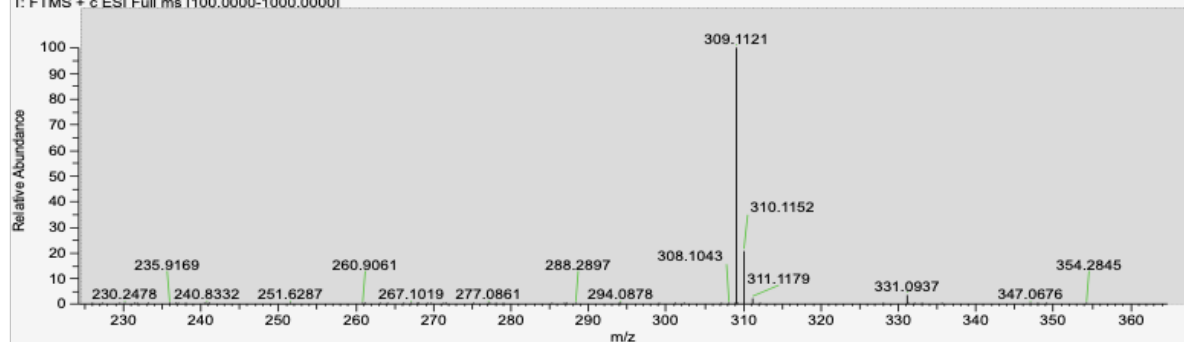

| Peak Mass | Display Formula                                                 | Combined Fit  | RDB  | Delta [ppm] | Theo. mass | Rank | Combined Score | # Matched Iso. | # Missed Iso. | MS Cov. [%] | Pattern Cov. [%] |
|-----------|-----------------------------------------------------------------|---------------|------|-------------|------------|------|----------------|----------------|---------------|-------------|------------------|
| 309,1121  | C <sub>19</sub> H <sub>17</sub> O <sub>4</sub>                  | 24,8937856024 | 11,5 | -0,15       | 309,11214  | 1    | 95,99          | 4              | 4             | 99,93       | 98,96            |
| 331,0937  | C <sub>19</sub> H <sub>16</sub> O <sub>4</sub> <sup>23</sup> Na | 17,1572498096 | 11,5 | -1,02       | 331,09408  | 3    | 95,46          | 3              | 5             | 99,81       | 98,83            |

5-VF\_CIGSPP-UniFe\_DDA\_026 #2095 RT: 9.73 AV: 1 NL: 1.94E+008  
T: FTMS + c ESI d Full ms2 309.1122@hcd36.00 [50.0000-335.0000]

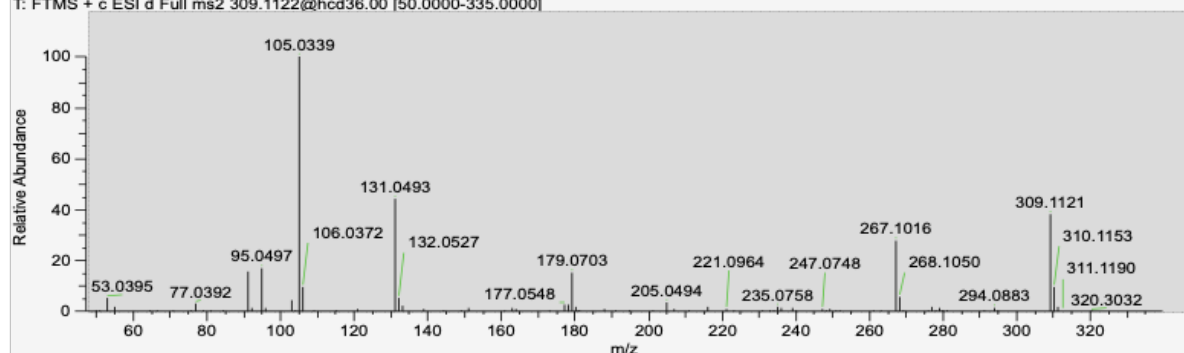

## 2-(2,2-dimethoxyethoxy)-1,4-dimethoxybenzene (**18**)

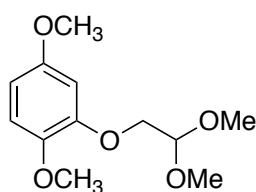



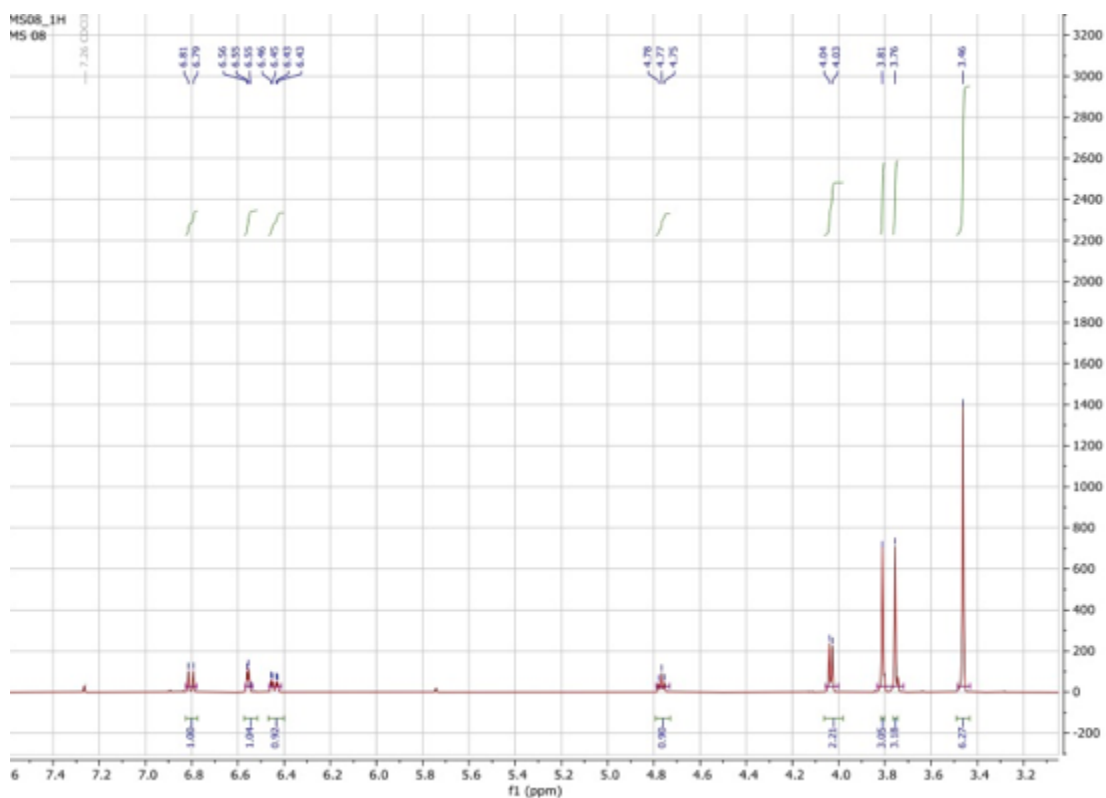

<sup>1</sup>H NMR (400 MHz, Chloroform-*d*)  $\delta$  6.80 (d, *J* = 8.8 Hz, 1H), 6.56 (d, *J* = 2.9 Hz, 1H), 6.44 (dd, *J* = 8.8, 2.8 Hz, 1H), 4.77 (t, *J* = 5.2 Hz, 1H), 4.03 (d, *J* = 5.2 Hz, 2H), 3.78 (d, *J* = 21.9 Hz, 6H), 3.46 (s, 6H).

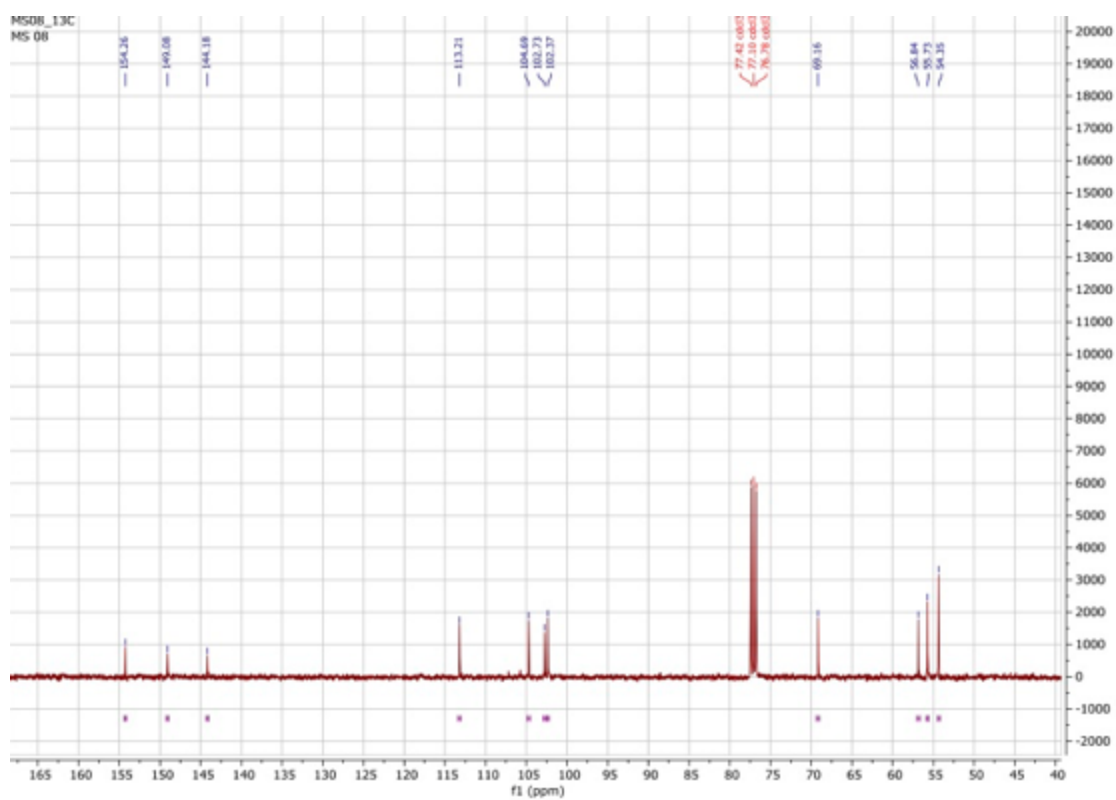

<sup>13</sup>C NMR (101 MHz, Chloroform-*d*)  $\delta$  154.26, 149.08, 144.18, 113.21, 104.69, 102.73, 102.37, 69.16, 56.84, 55.73, 54.35.

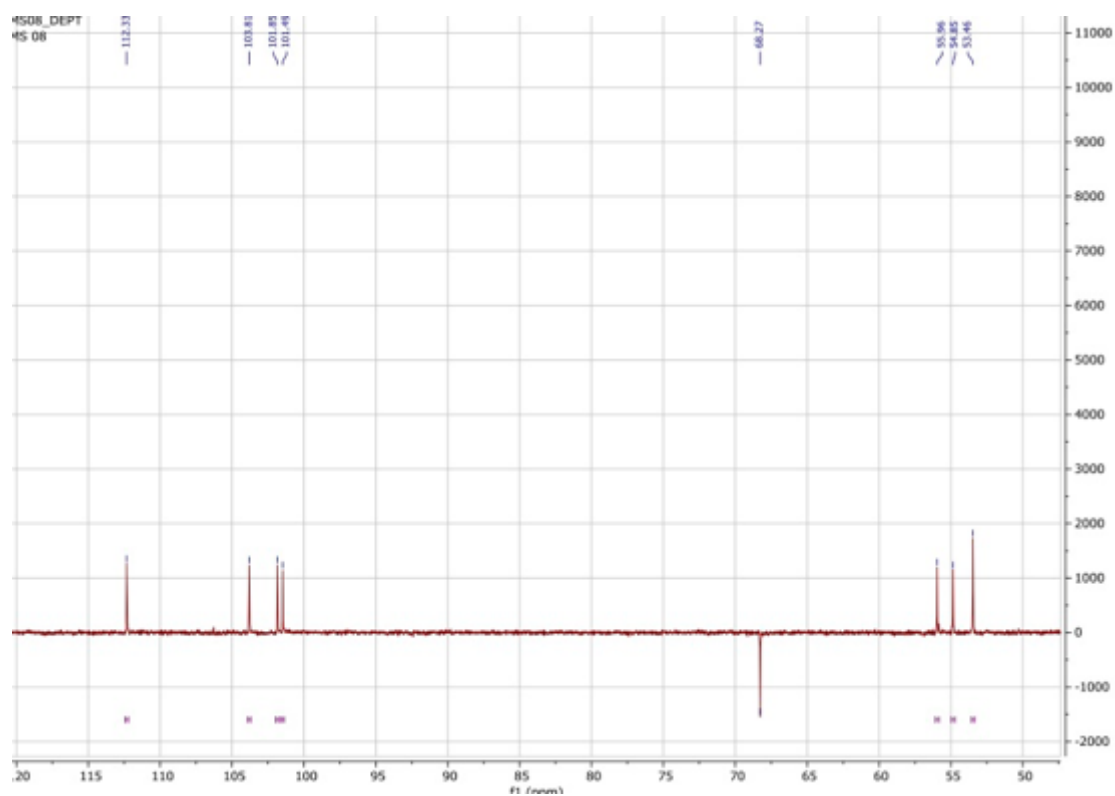

## 4,7-dimethoxybenzofuran (19)

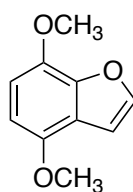

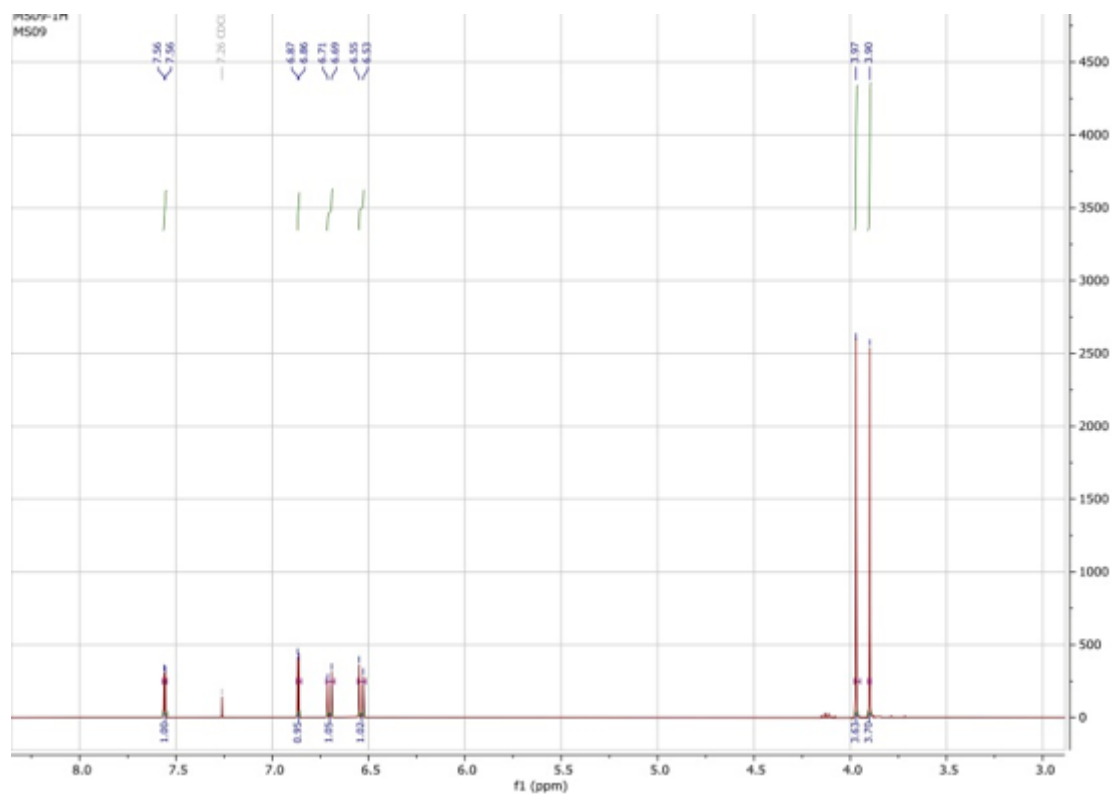

<sup>1</sup>H NMR (400 MHz, Chloroform-*d*)  $\delta$  7.56 (d,  $J$  = 2.1 Hz, 1H), 6.86 (d,  $J$  = 2.1 Hz, 1H), 6.70 (d,  $J$  = 8.5 Hz, 1H), 6.54 (d,  $J$  = 8.5 Hz, 1H), 3.97 (s, 3H), 3.90 (s, 3H).

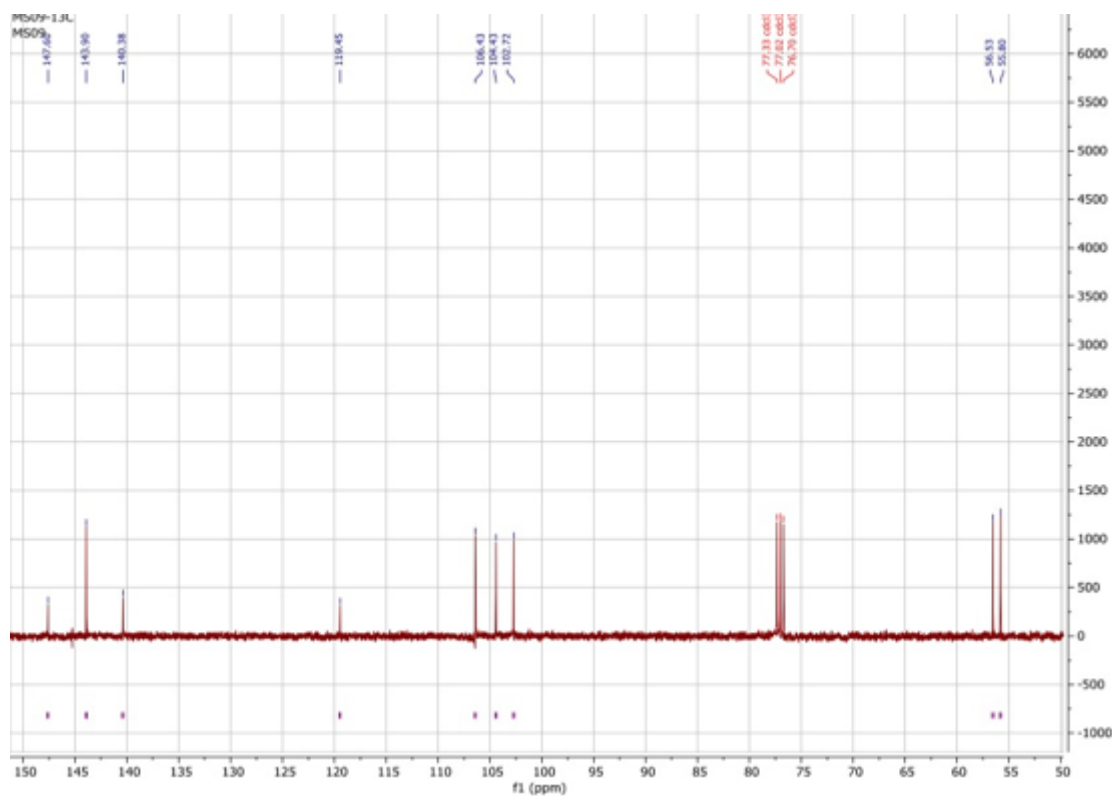

<sup>13</sup>C NMR (101 MHz, Chloroform-*d*)  $\delta$  147.60, 143.90, 140.38, 119.45, 106.43, 104.43, 102.72, 56.53, 55.80.

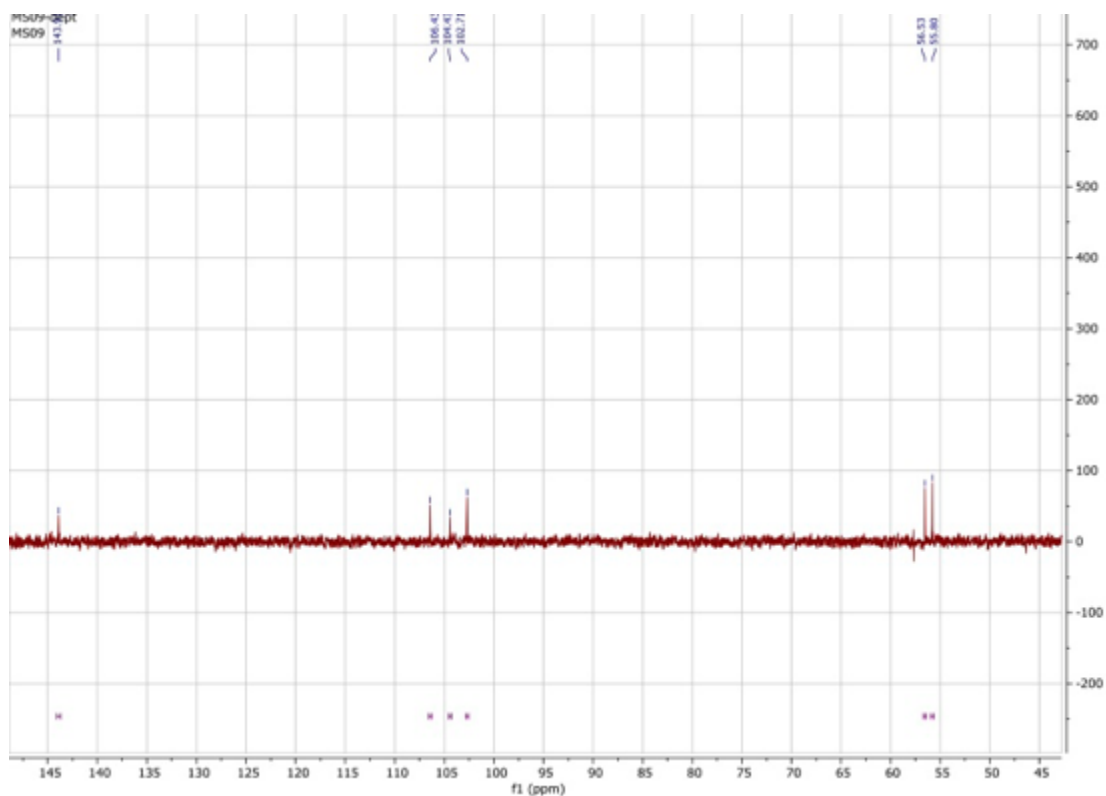

$^{13}\text{C}$  NMR (101 MHz, Chloroform- $d$ )  $\delta$  143.91, 106.43, 104.43, 102.71, 56.53, 55.80.

4,7-dimethoxybenzofuran-2-carbaldehyde (**20**) + 4,7-dimethoxybenzofuran-5-carbaldehyde (**7**)

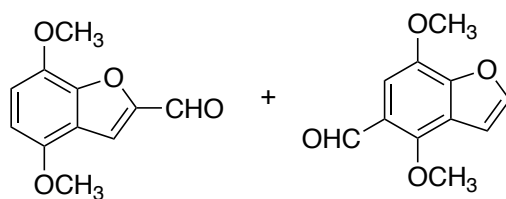

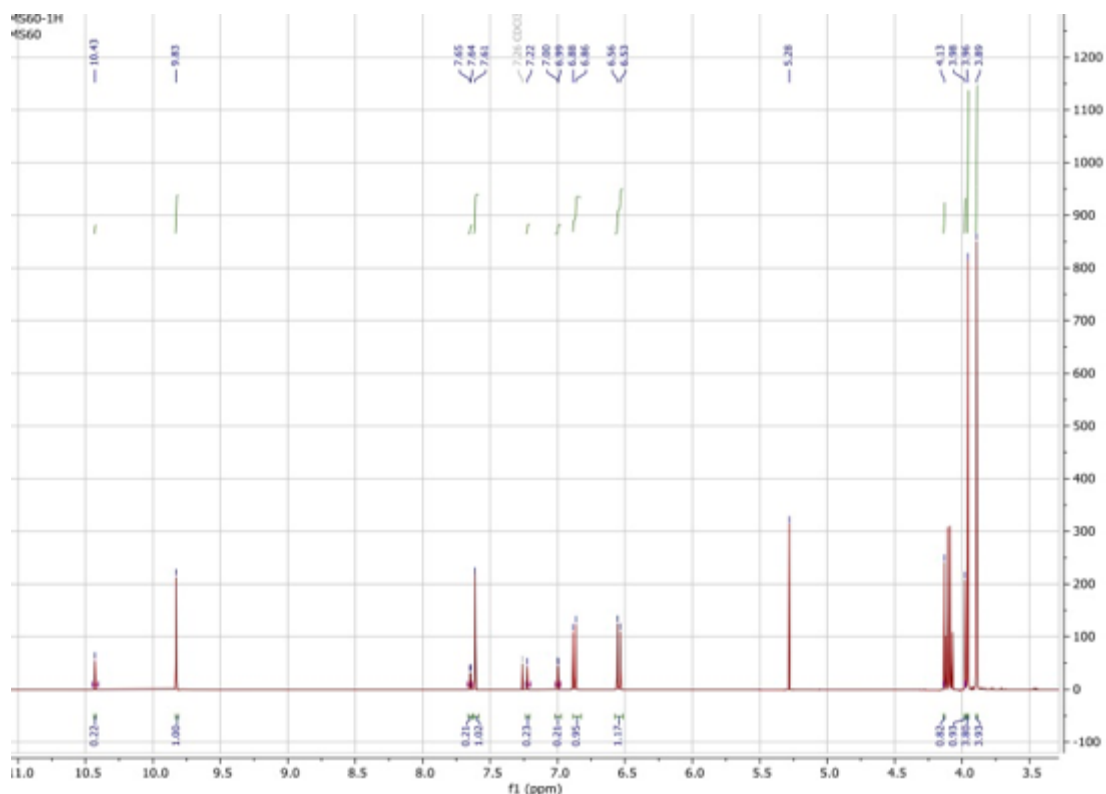

**15** <sup>1</sup>H NMR (400 MHz, Chloroform-*d*) δ 10.43 (s, 1H), 7.65 (d, *J* = 2.3 Hz, 1H), 7.22 (s, 1H), 7.00 (d, *J* = 2.3 Hz, 1H), 4.13 (s, 3H), 3.98 (s, 3H).

**16** <sup>1</sup>H NMR (400 MHz, Chloroform-*d*) δ 9.83 (s, 1H), 7.61 (s, 1H), 6.87 (d, *J* = 8.5 Hz, 1H), 6.54 (d, *J* = 8.6 Hz, 1H), 3.96 (s, 3H), 3.89 (s, 3H).

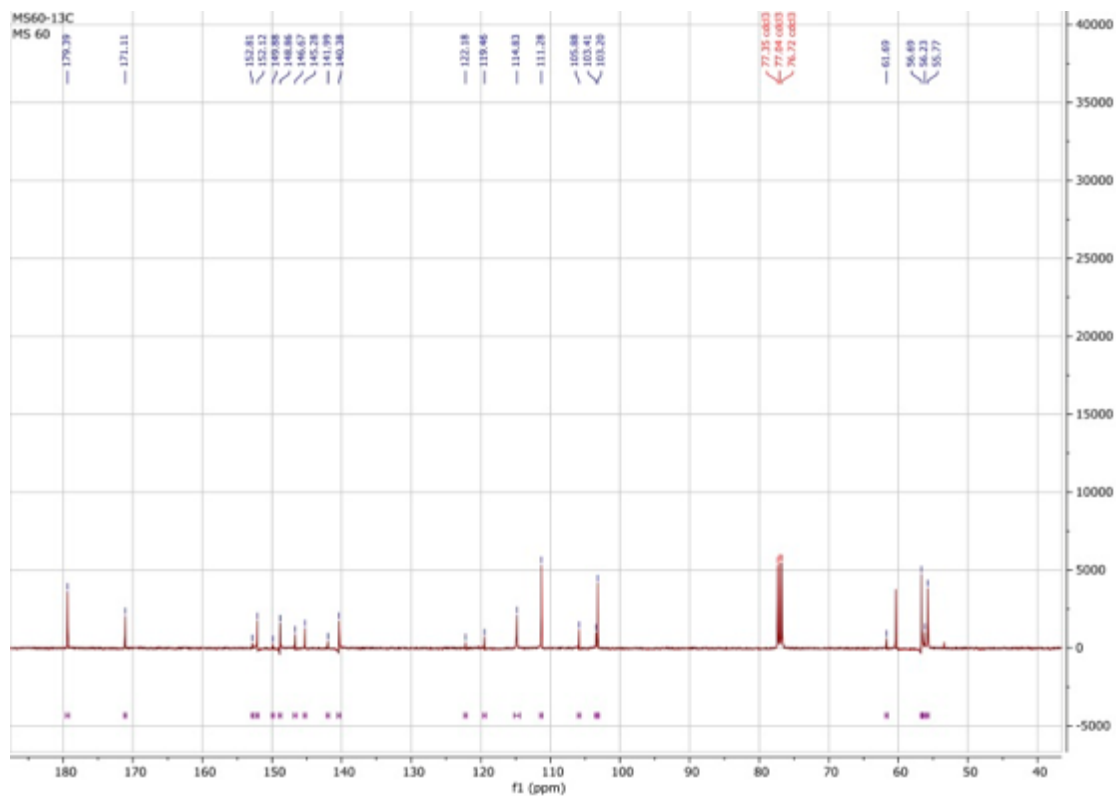

$^{13}\text{C}$  NMR (101 MHz, Chloroform- $d$ )  $\delta$  189.05, 179.39, 171.11, 152.81, 152.12, 149.88, 148.86, 146.67, 145.28, 141.99, 140.38, 122.18, 119.46, 114.83, 111.28, 105.88, 103.41, 103.20, 77.35, 77.04, 76.72, 61.69, 56.69, 56.23, 55.77.

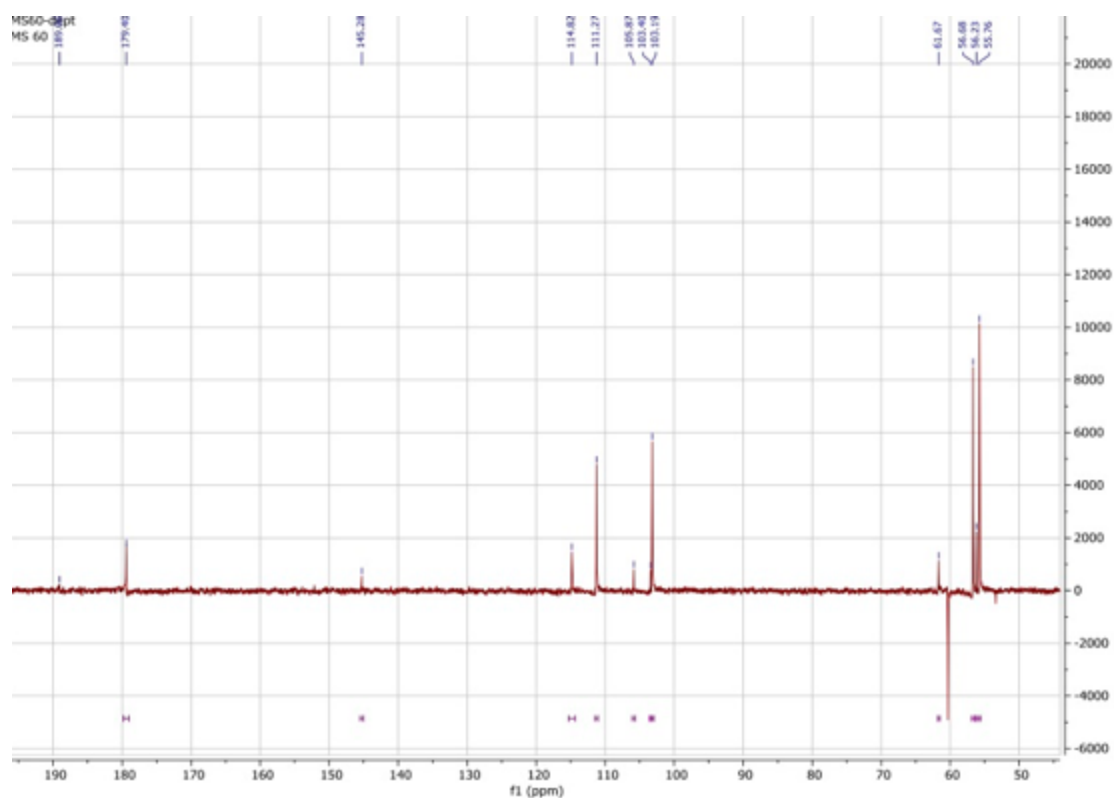

$^{13}\text{C}$  NMR (101 MHz, Chloroform- $d$ )  $\delta$  189.06, 179.40, 145.28, 114.82, 111.27, 105.87, 103.40, 103.19, 61.67, 56.68, 56.23, 55.76.

## Area % Report

Data File: C:\32Karat\Projects\Default\Data\delia\Martina\2-5dimetossibenzofurano.dat  
 Method: C:\32Karat\Projects\Default\Method\standard 0.7 ml.met  
 Acquired: 01/04/2021 12.52.29  
 Printed: 04/08/2022 13.17.44

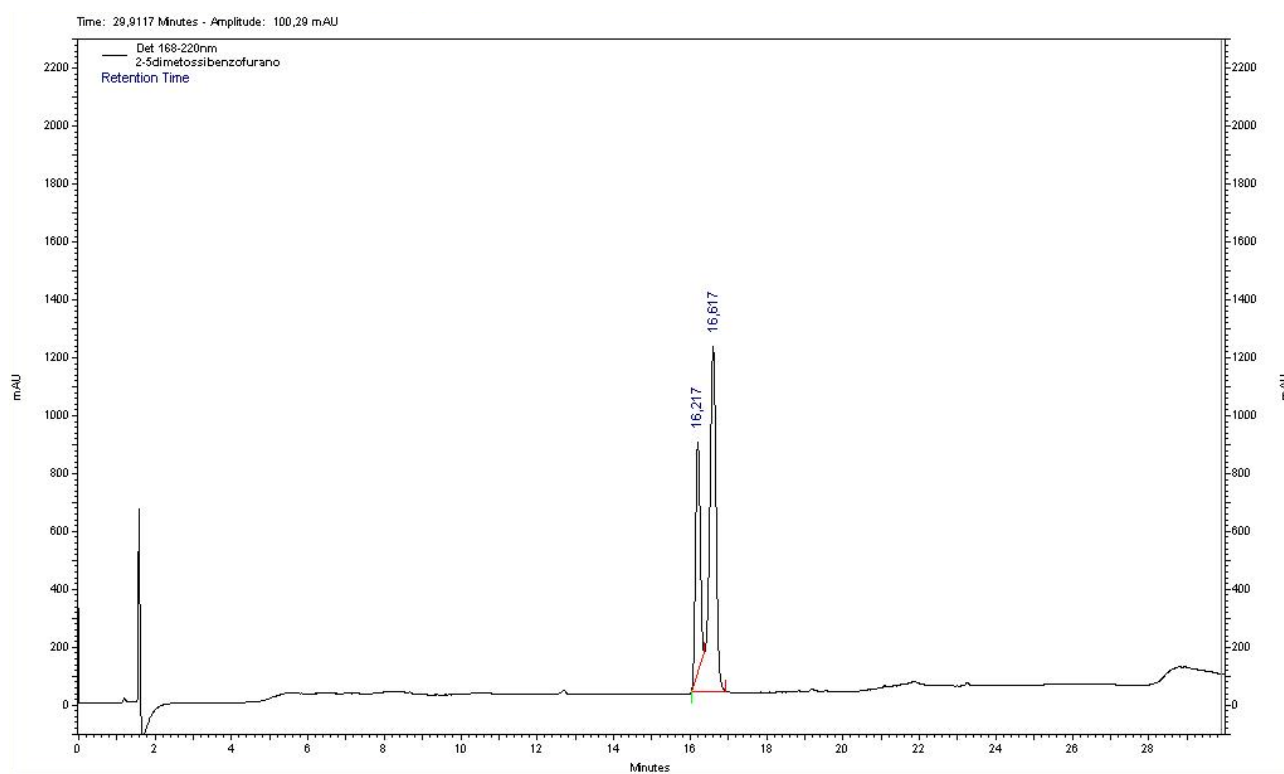

**Det 168-220nm  
Results**

| Time   | Area     | Area % | Height  | Height % |
|--------|----------|--------|---------|----------|
| 16,217 | 6780940  | 30,65  | 796575  | 40,05    |
| 16,617 | 15339907 | 69,35  | 1192260 | 59,95    |

|        |          |        |         |        |
|--------|----------|--------|---------|--------|
| Totals | 22120847 | 100,00 | 1988835 | 100,00 |
|--------|----------|--------|---------|--------|

4,7-dimethoxybenzofuran-6-carbaldehyde (21)

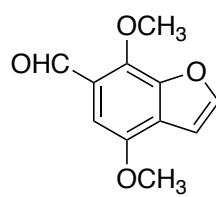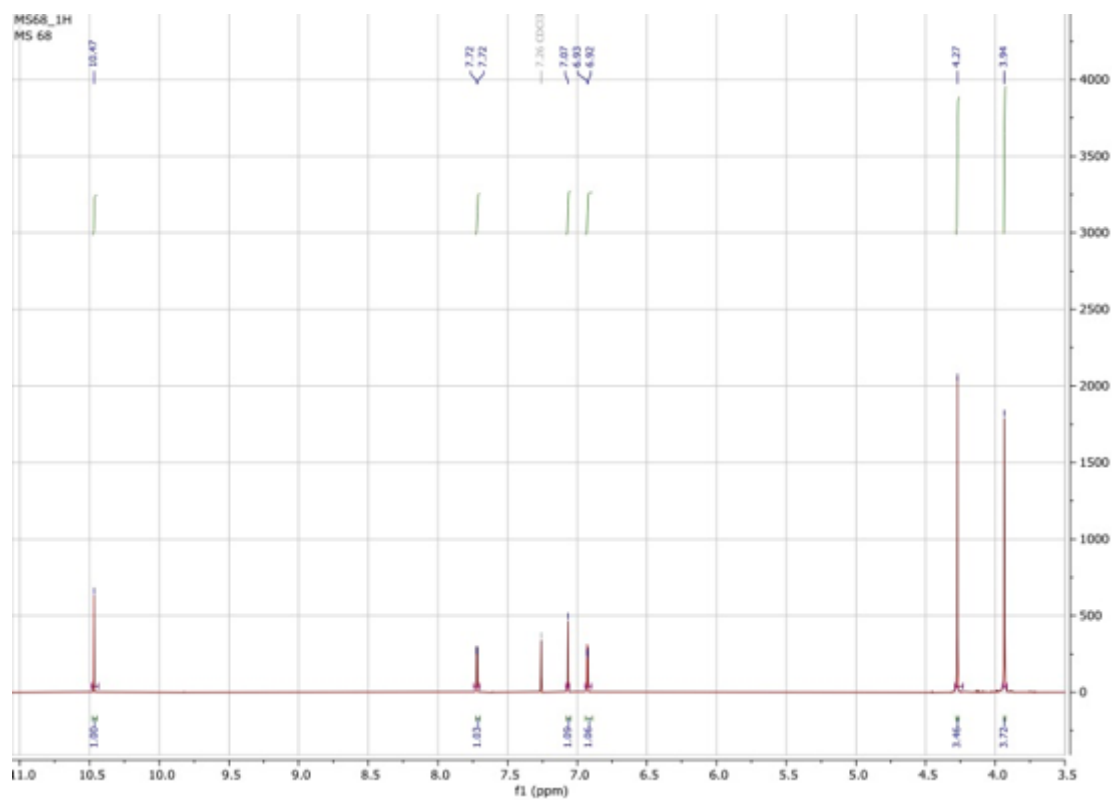

<sup>1</sup>H NMR (400 MHz, Chloroform-*d*) δ 10.47 (s, 1H), 7.72 (d, *J* = 2.1 Hz, 1H), 7.07 (s, 1H), 6.92 (d, *J* = 2.1 Hz, 1H), 4.27 (s, 3H), 3.94 (s, 3H).



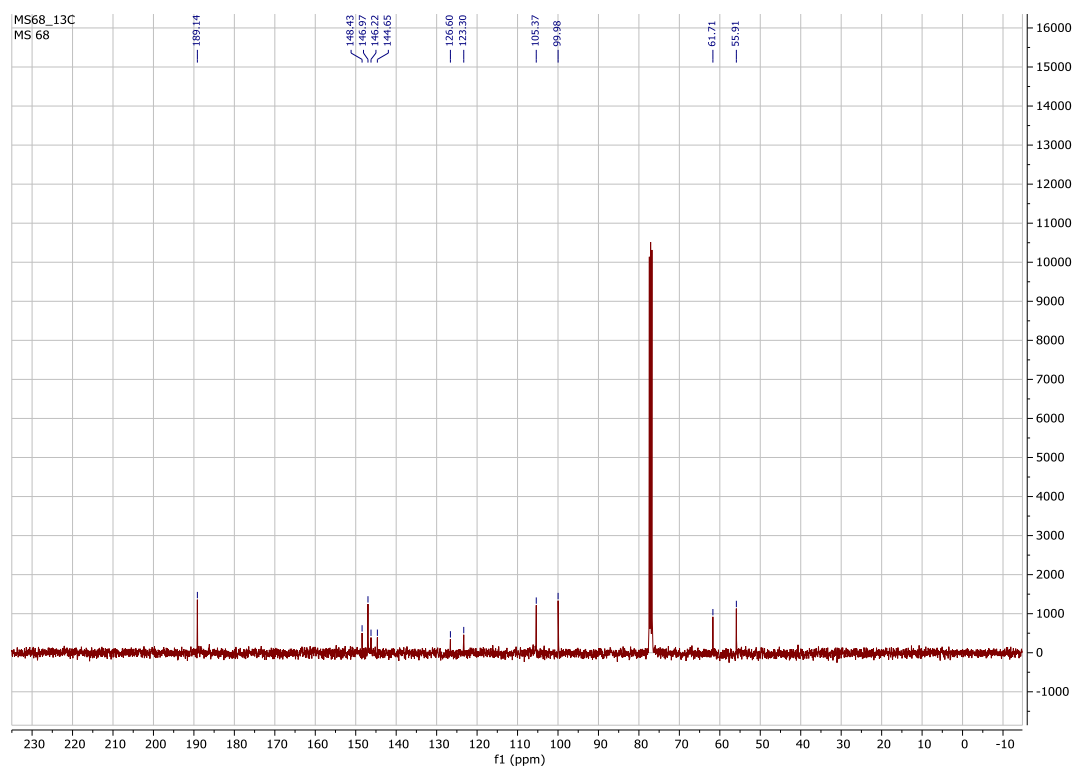

$^{13}\text{C}$  NMR (101 MHz, Chloroform-d)  $\delta$  189.14, 148.43, 146.97, 146.22, 144.65, 126.60, 123.30, 105.37, 99.98, 61.71, 55.91.

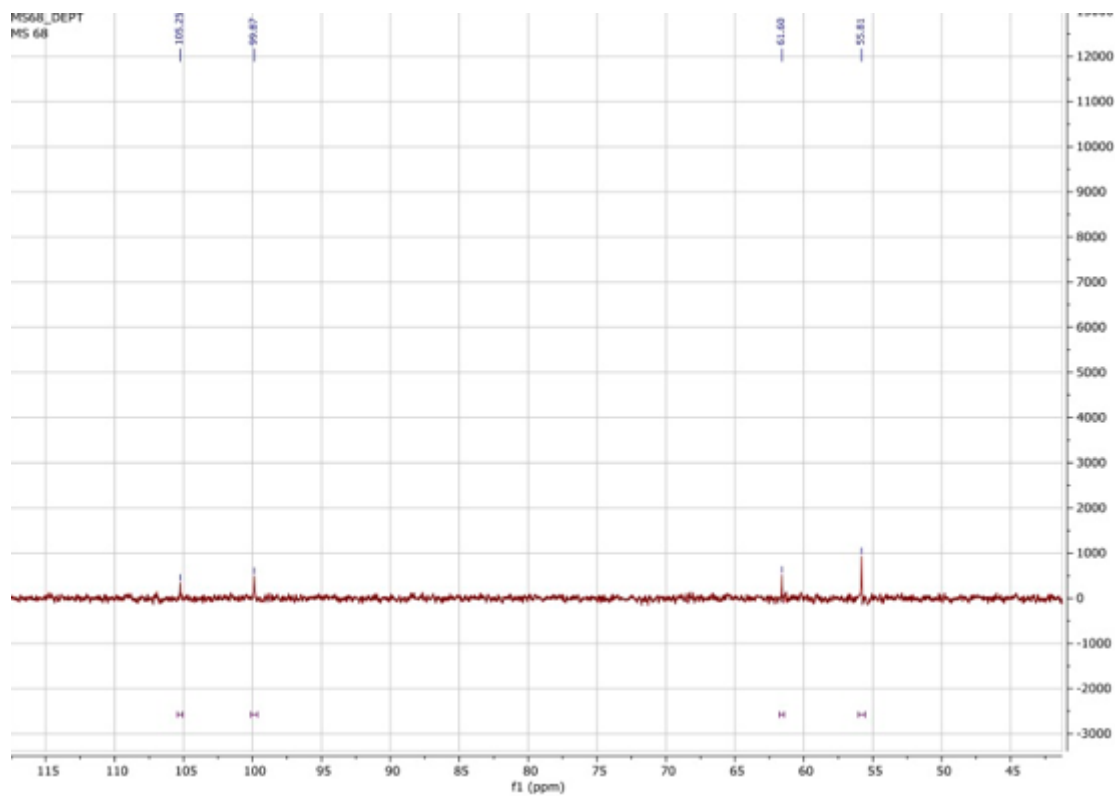

$^{13}\text{C}$  NMR (101 MHz, Chloroform-d)  $\delta$  105.25, 99.87, 61.60, 55.81.

1-(2,5-dimethoxyphenoxy)propan-2-one (24)

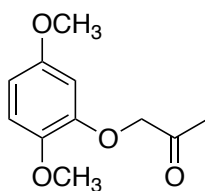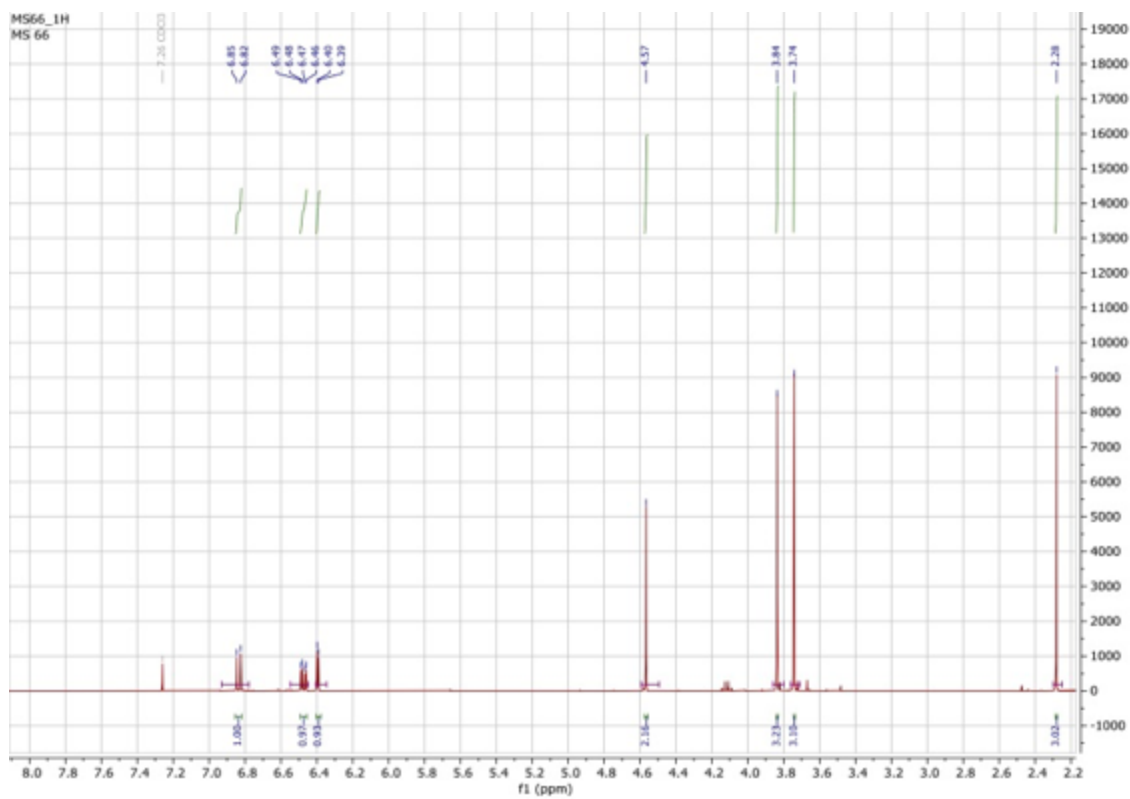

$^1\text{H}$  NMR (400 MHz, Chloroform- $d$ )  $\delta$  6.83 (d,  $J = 8.8$  Hz, 1H), 6.47 (dd,  $J = 8.8, 2.8$  Hz, 1H), 6.39 (d,  $J = 2.8$  Hz, 1H), 4.57 (s, 2H), 3.84 (s, 3H), 3.74 (s, 3H), 2.28 (s, 3H).

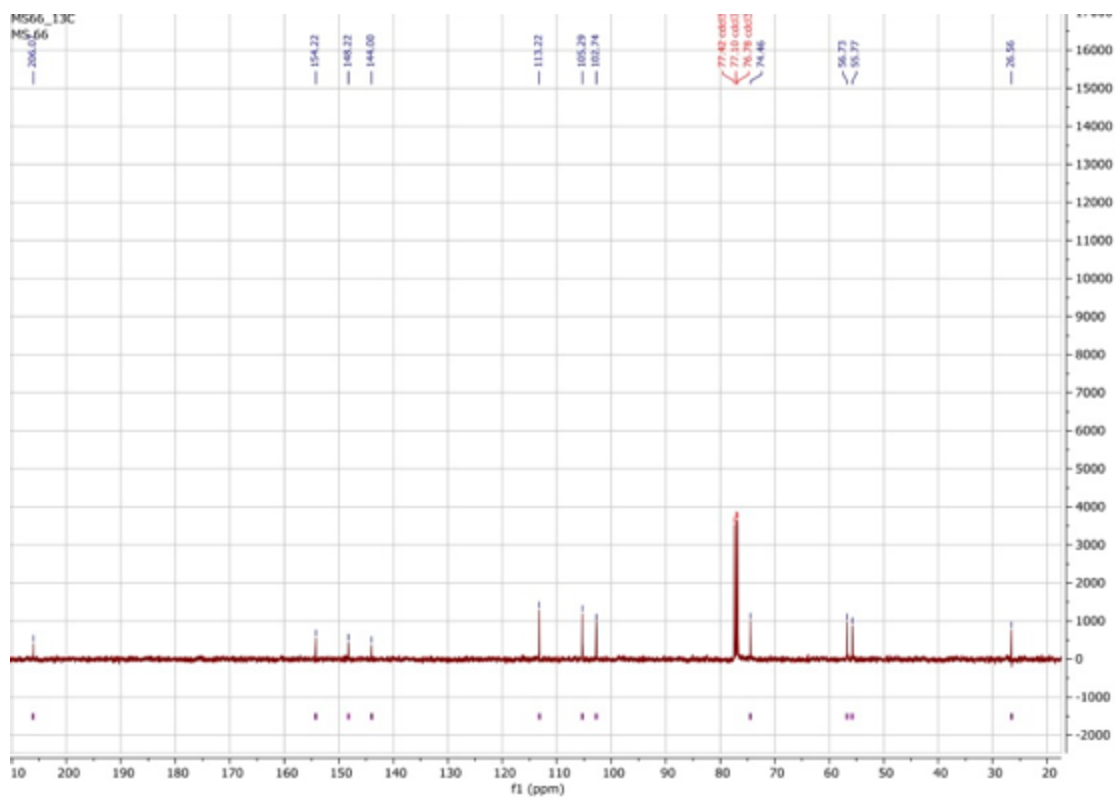

<sup>13</sup>C NMR (101 MHz, Chloroform-d) δ 206.07, 154.22, 148.22, 144.00, 113.22, 105.29, 102.74, 74.46, 56.73, 55.77, 26.56.

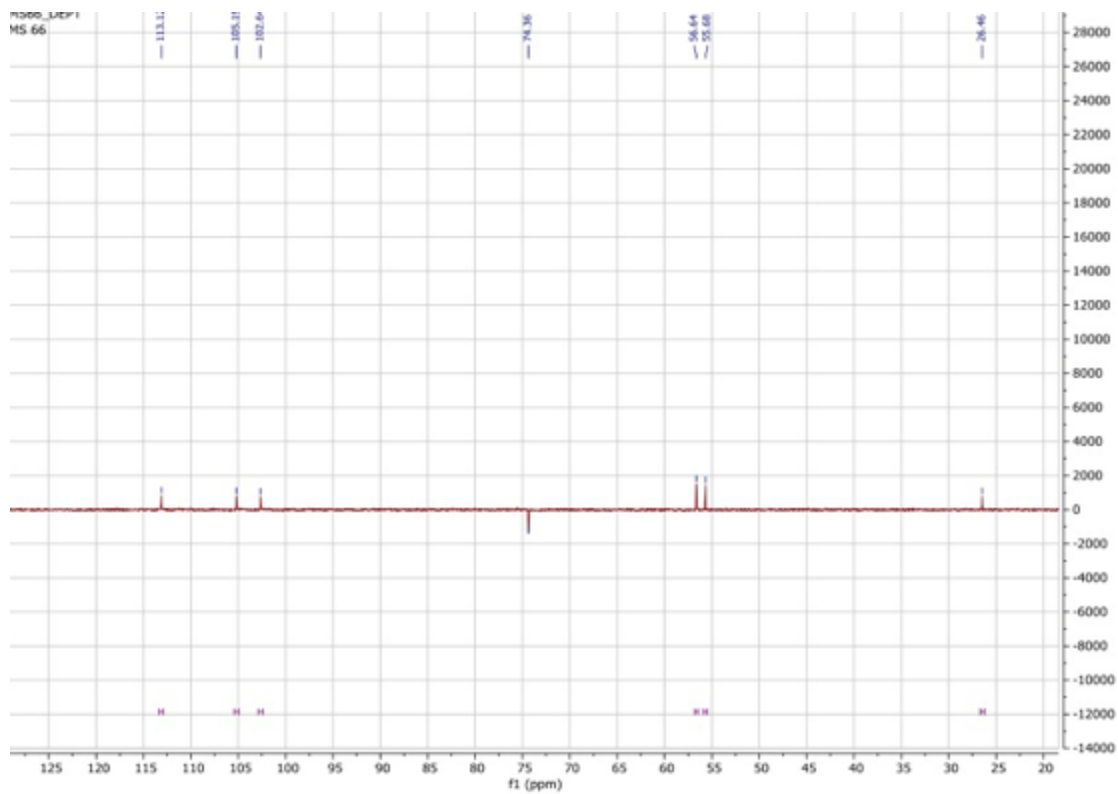

<sup>13</sup>C NMR (101 MHz, Chloroform-d) δ 113.12, 105.19, 102.64, 74.36, 56.64, 55.68, 26.46.

## 4,7-dimethoxy-3-methylbenzofuran (25)

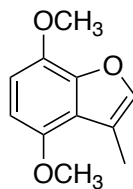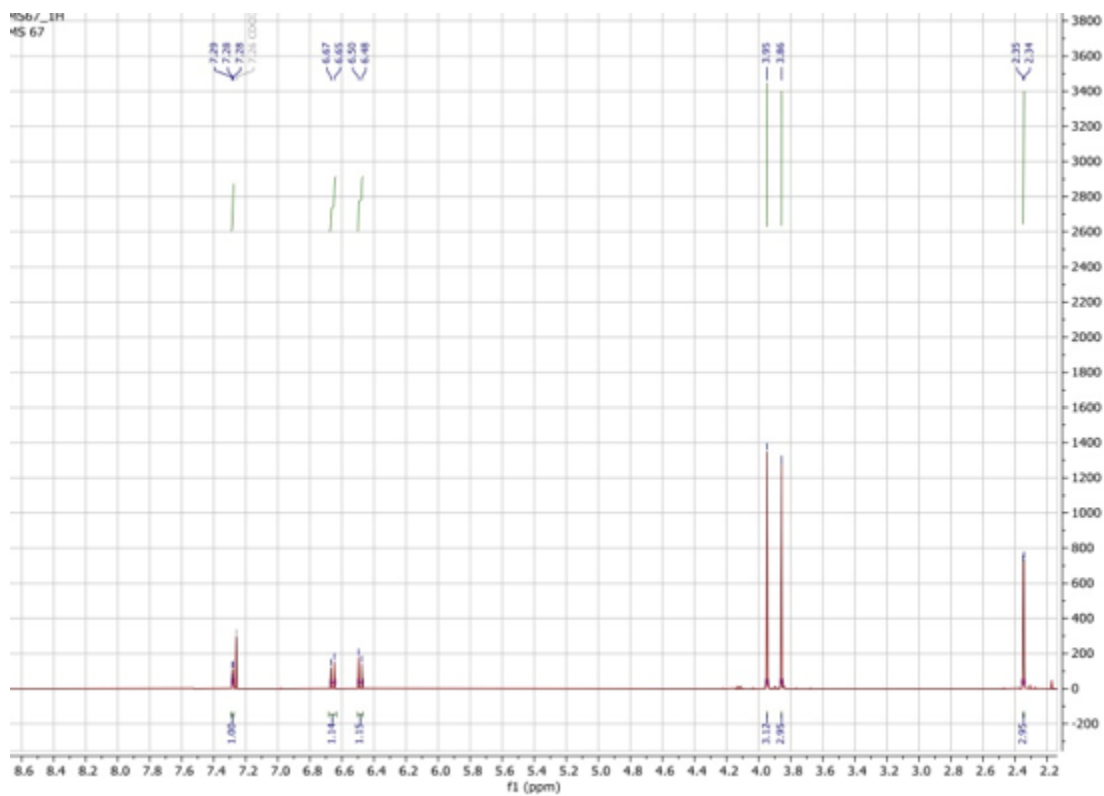

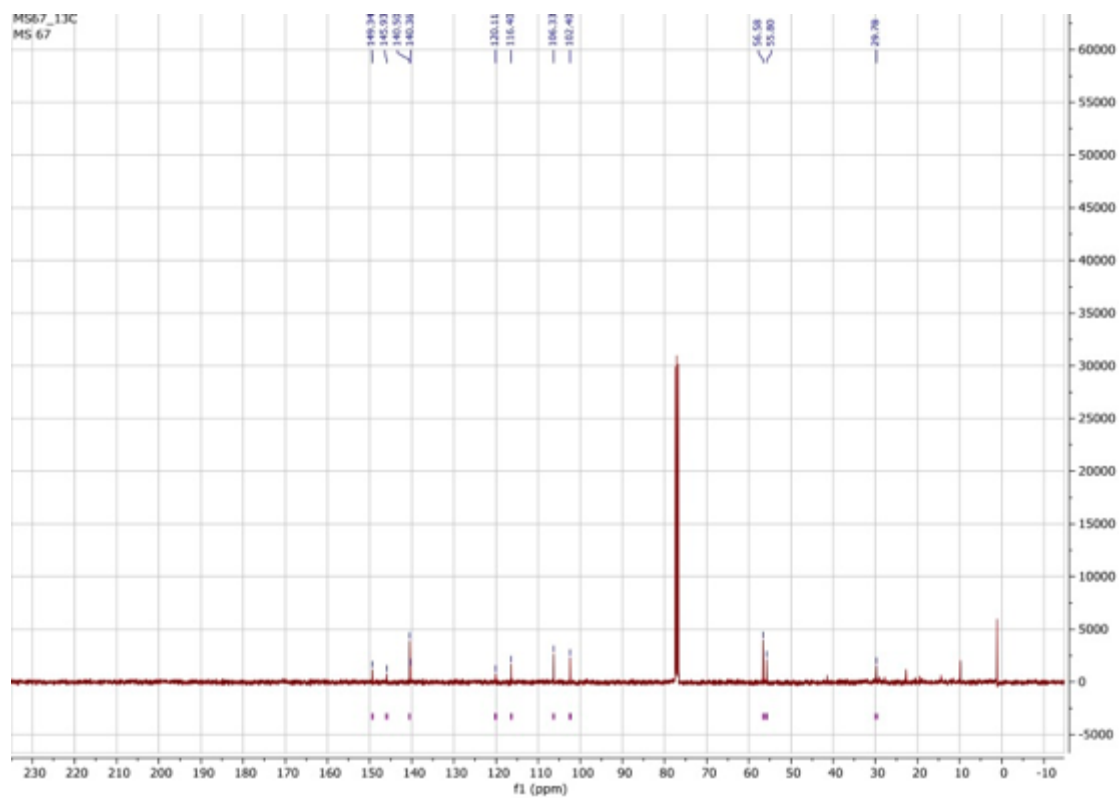

<sup>13</sup>C NMR (101 MHz, Chloroform-d)  $\delta$  149.34, 145.93, 140.50, 140.36, 120.11, 116.40, 106.33, 102.40, 56.58, 55.80, 29.78.

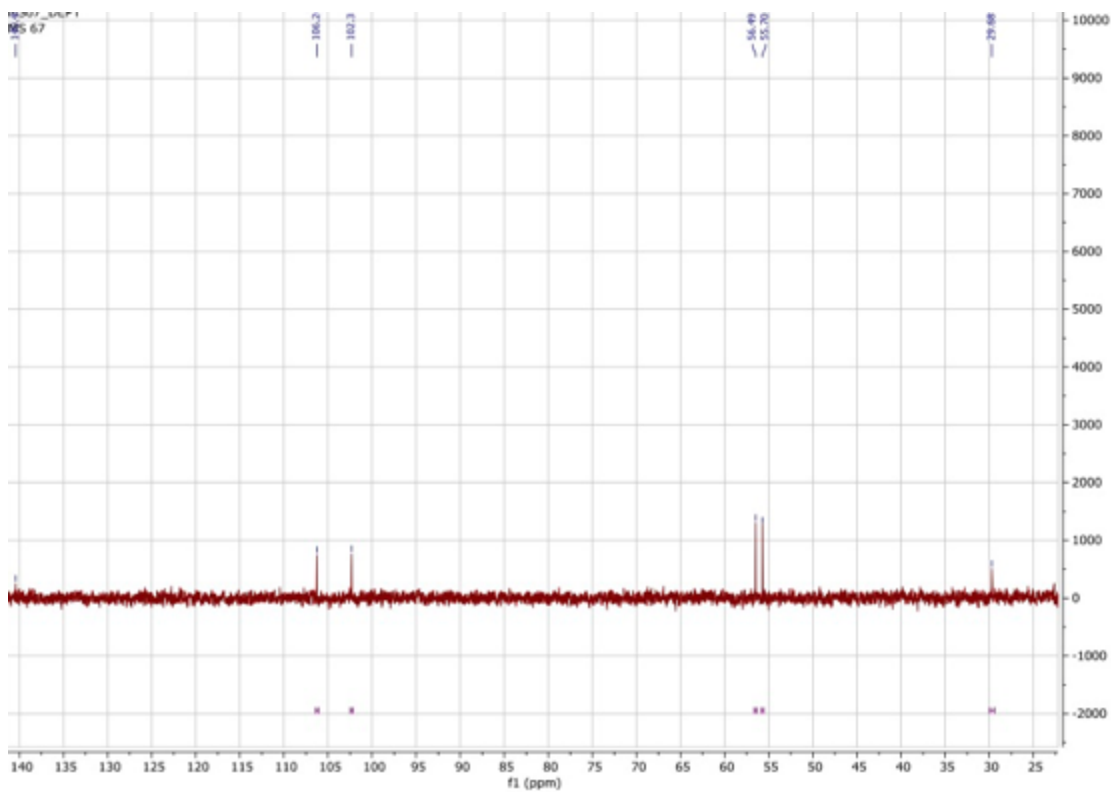

<sup>13</sup>C NMR (101 MHz, Chloroform-d)  $\delta$  140.41, 106.24, 102.31, 56.49, 55.70, 29.68.

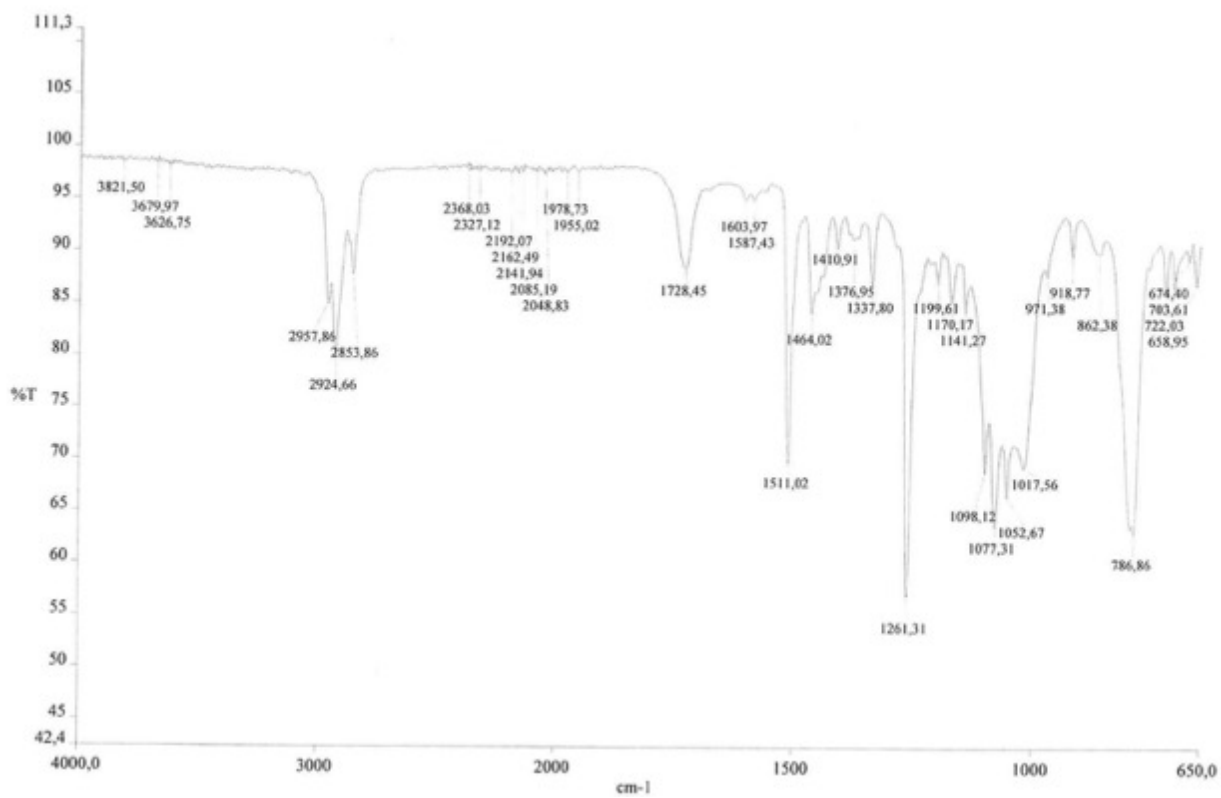

(4,7-dimethoxybenzofuran-3-yl)methanol (26)

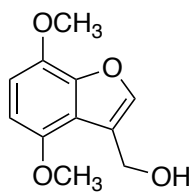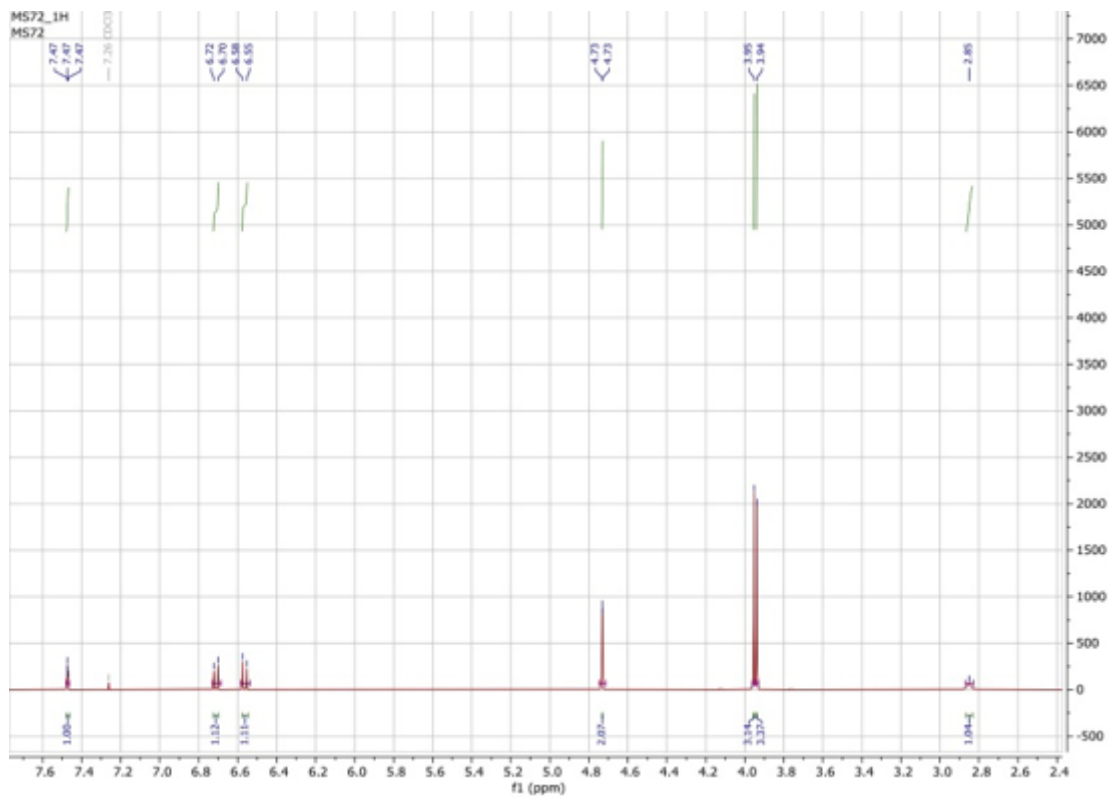

$^1\text{H}$  NMR (400 MHz, Chloroform-d)  $\delta$  7.47 (d,  $J$  = 1.0 Hz, 1H), 6.71 (d,  $J$  = 8.6 Hz, 1H), 6.56 (d,  $J$  = 8.6 Hz, 1H), 4.73 (d,  $J$  = 0.9 Hz, 2H), 3.95 (s, 3H), 3.94 (s, 3H), 2.85 (s, 1H).

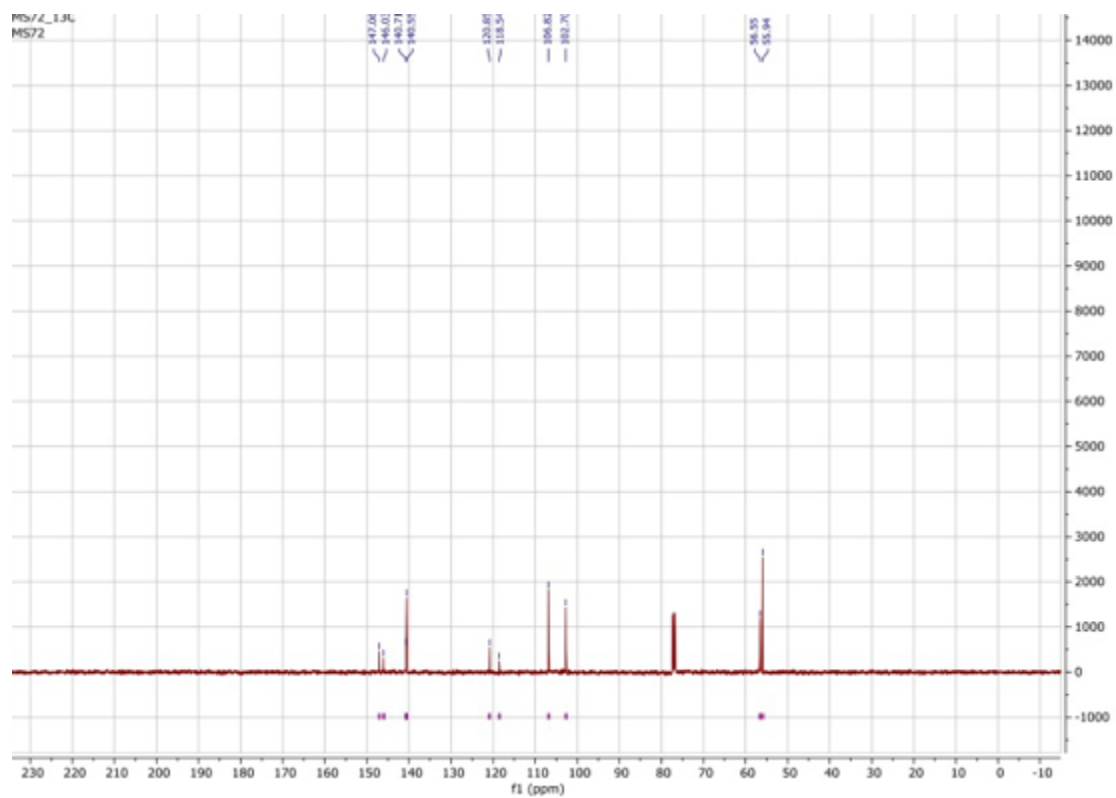

<sup>13</sup>C NMR (101 MHz, Chloroform-d)  $\delta$  147.06, 146.03, 140.71, 140.55, 120.85, 118.54, 106.82, 102.70, 56.55, 55.94.

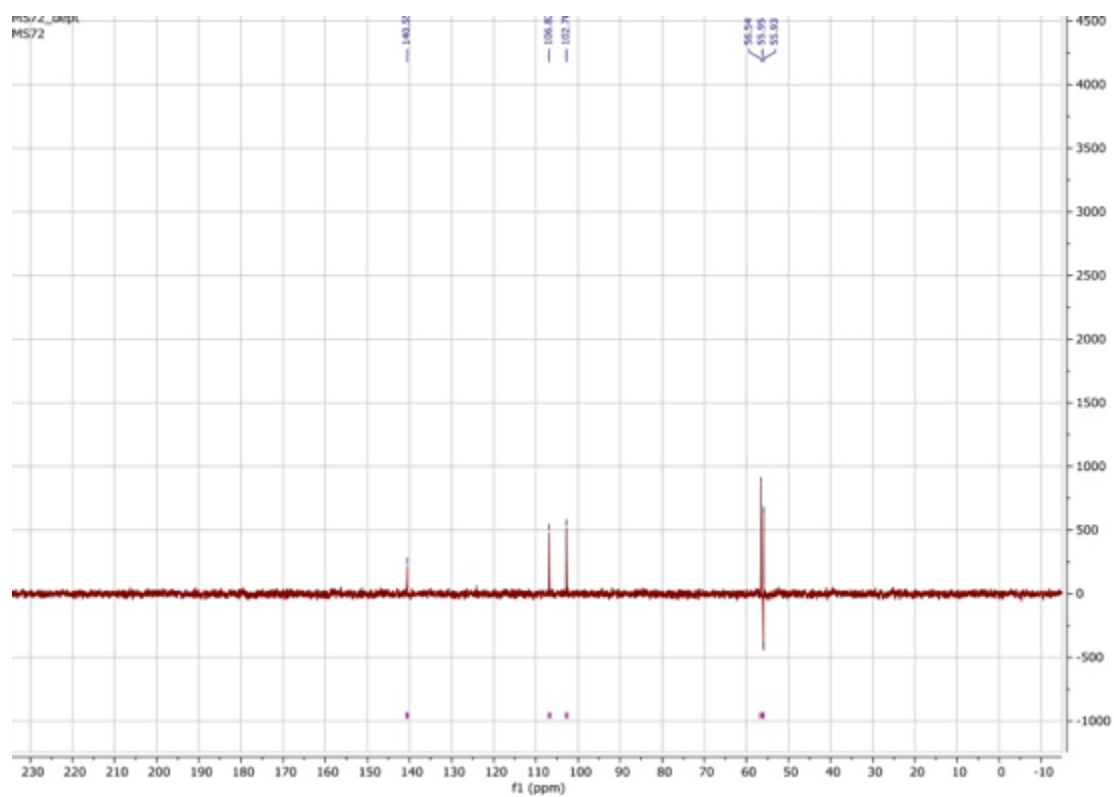

<sup>13</sup>C NMR (101 MHz, Chloroform-d)  $\delta$  140.55, 106.82, 102.70, 56.54, 55.95, 55.93.



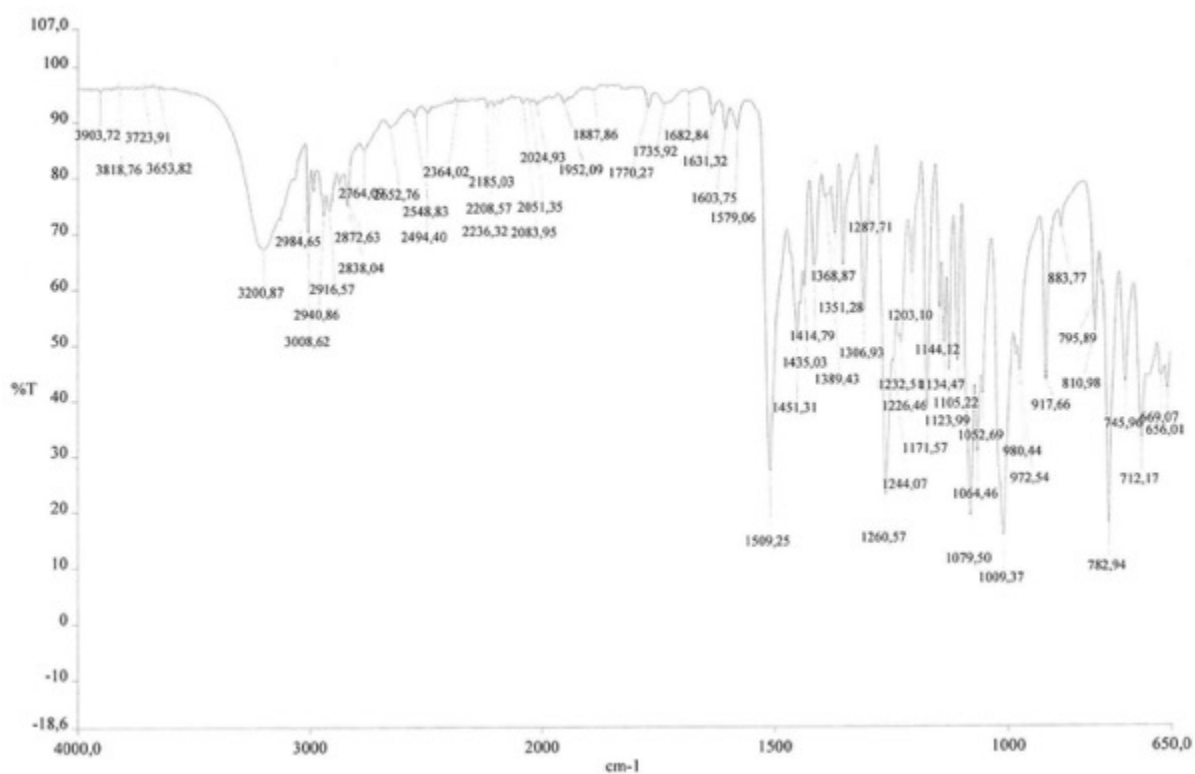

## 4,7-dimethoxybenzofuran-3-carbaldehyde (27)

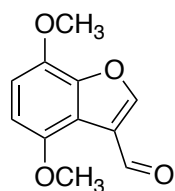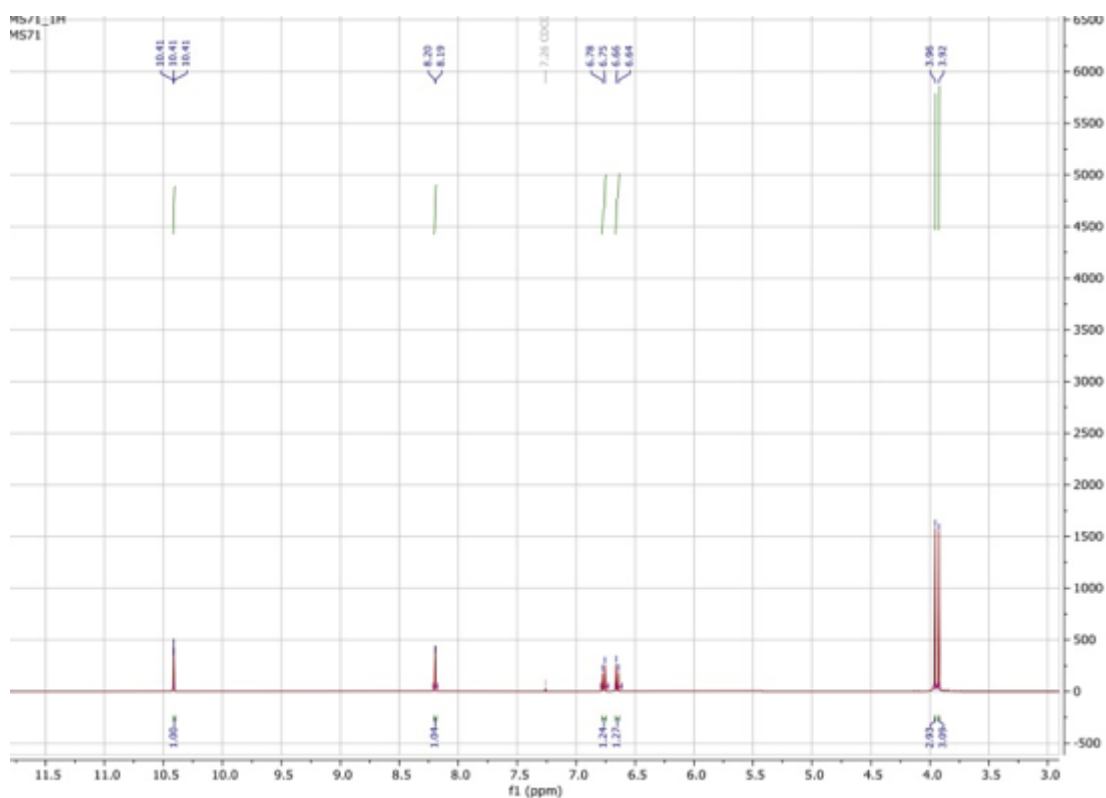

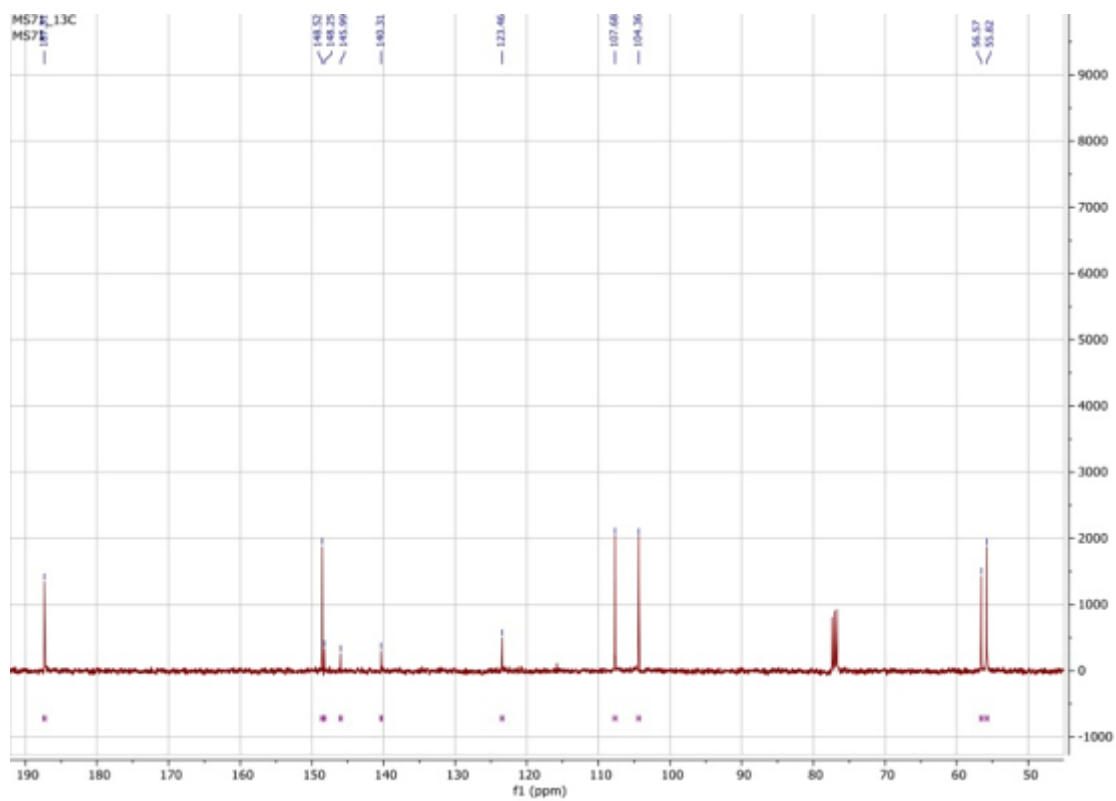

$^{13}\text{C}$  NMR (101 MHz, Chloroform-d)  $\delta$  187.31, 148.52, 148.25, 145.99, 140.31, 123.46, 107.68, 104.36, 56.57, 55.82.

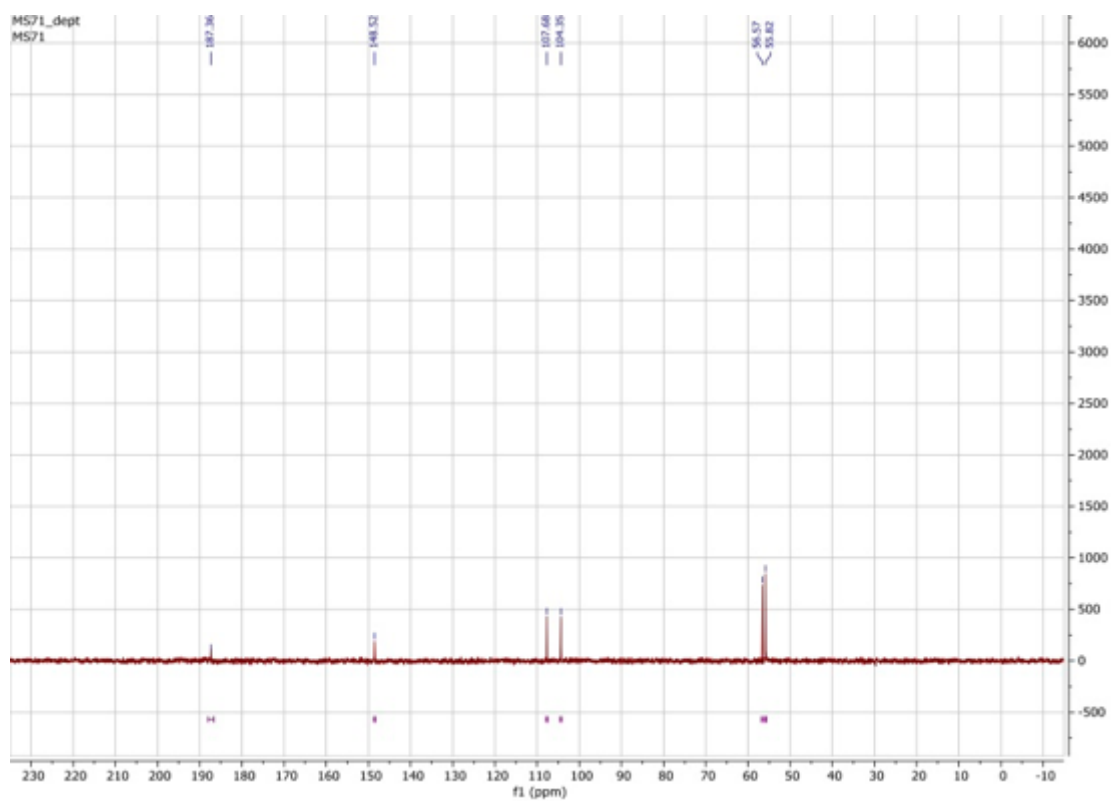

$^{13}\text{C}$  NMR (101 MHz, Chloroform-d)  $\delta$  187.36, 148.52, 107.68, 104.35, 56.57, 55.82.

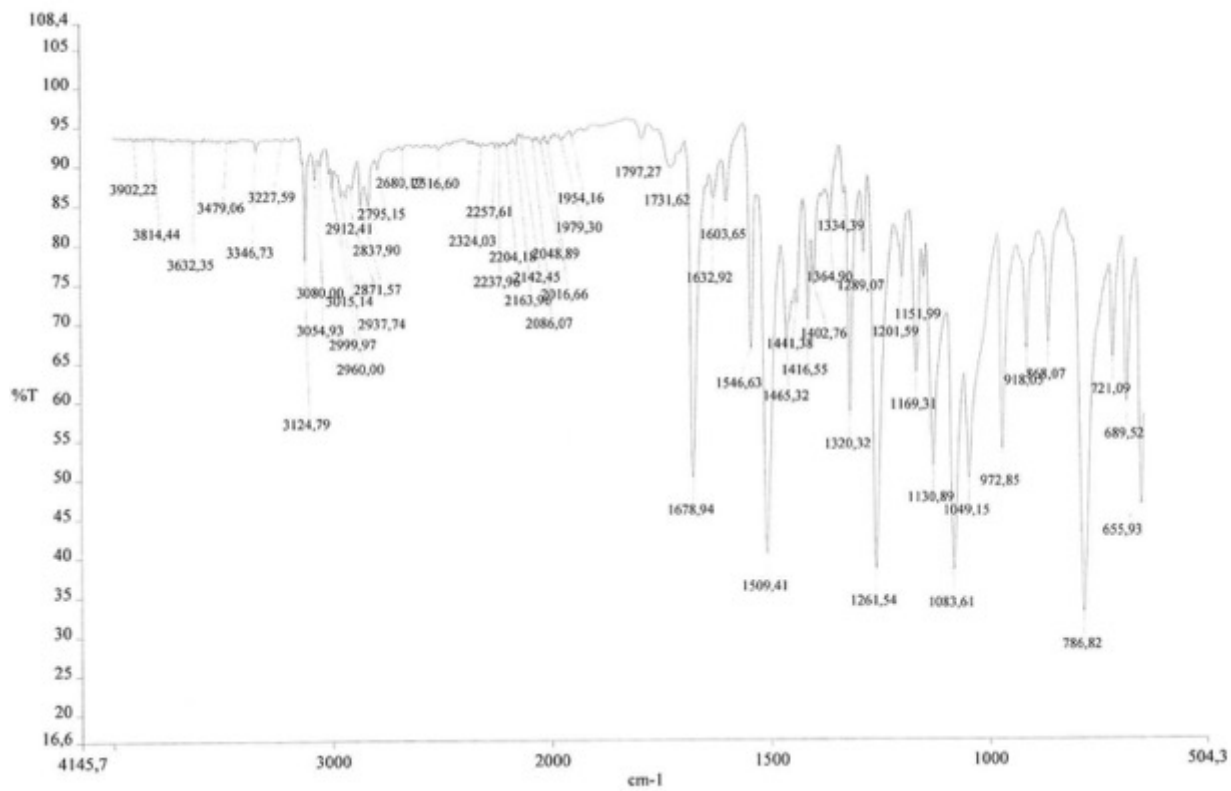

(*E*)-3-(4,7-dimethoxybenzofuran-6-yl)-1-phenylprop-2-en-1-one (23)

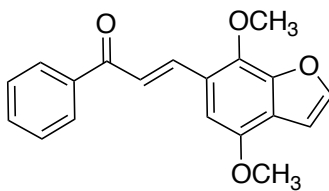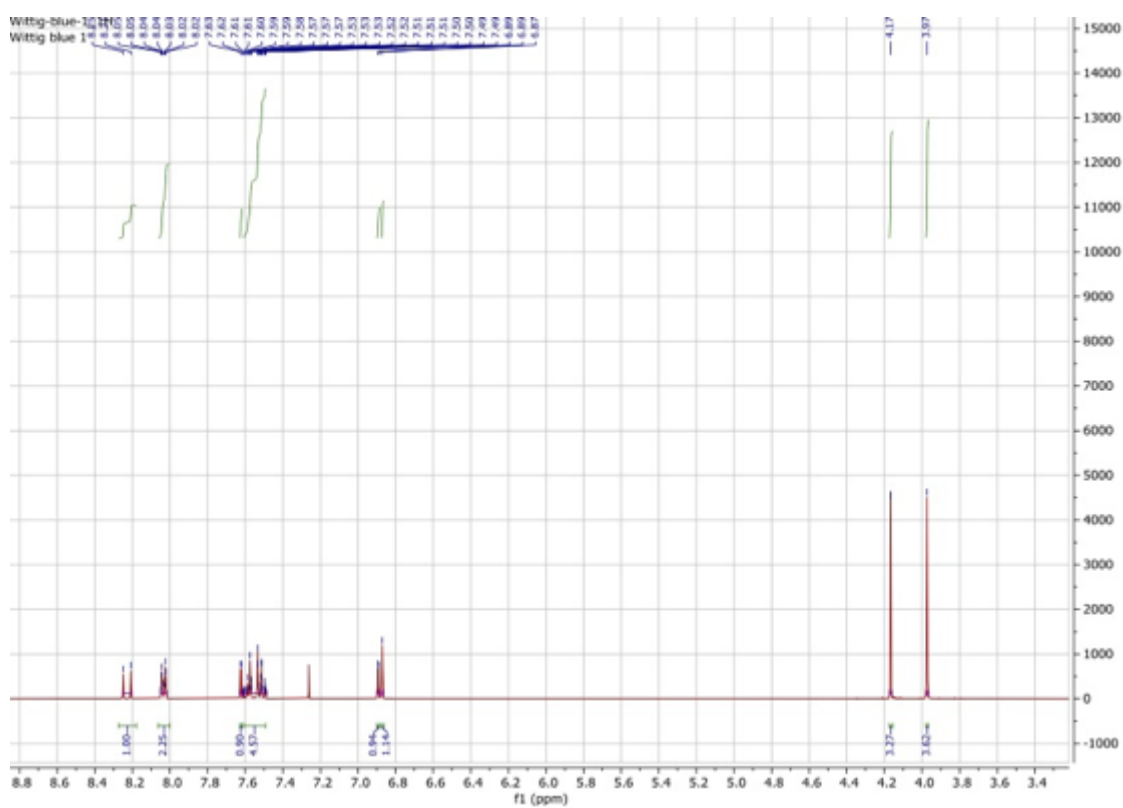

$^1\text{H}$  NMR (400 MHz, Chloroform-*d*)  $\delta$  8.23 (d,  $J = 15.9$  Hz, 1H), 8.05 – 8.02 (m, 2H), 7.62 (d,  $J = 2.1$  Hz, 1H), 7.61 – 7.49 (m, 4H), 6.89 (d,  $J = 2.1$  Hz, 1H), 6.87 (s, 1H), 4.17 (s, 3H), 3.97 (s, 3H).

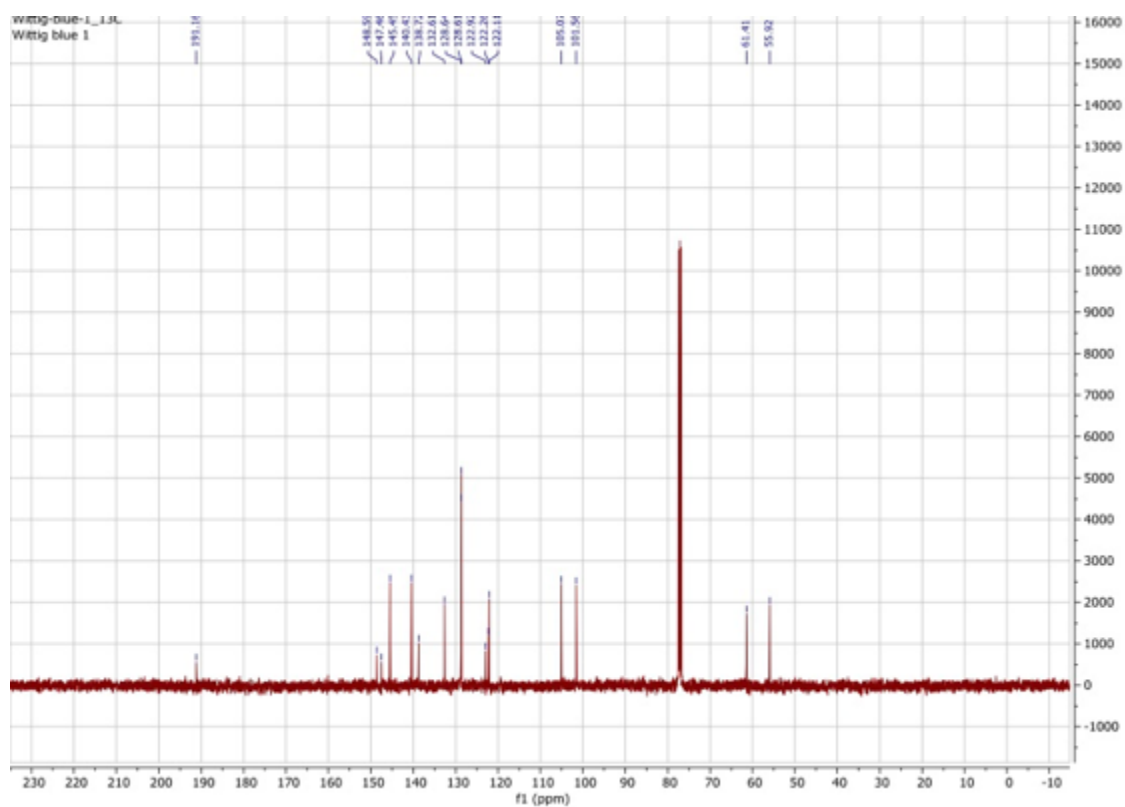

$^{13}\text{C}$  NMR (101 MHz, Chloroform-d)  $\delta$  191.16, 148.59, 147.46, 145.45, 140.43, 138.72, 132.61, 128.64, 128.61, 122.92, 122.26, 122.11, 105.07, 101.56, 61.41, 55.92.

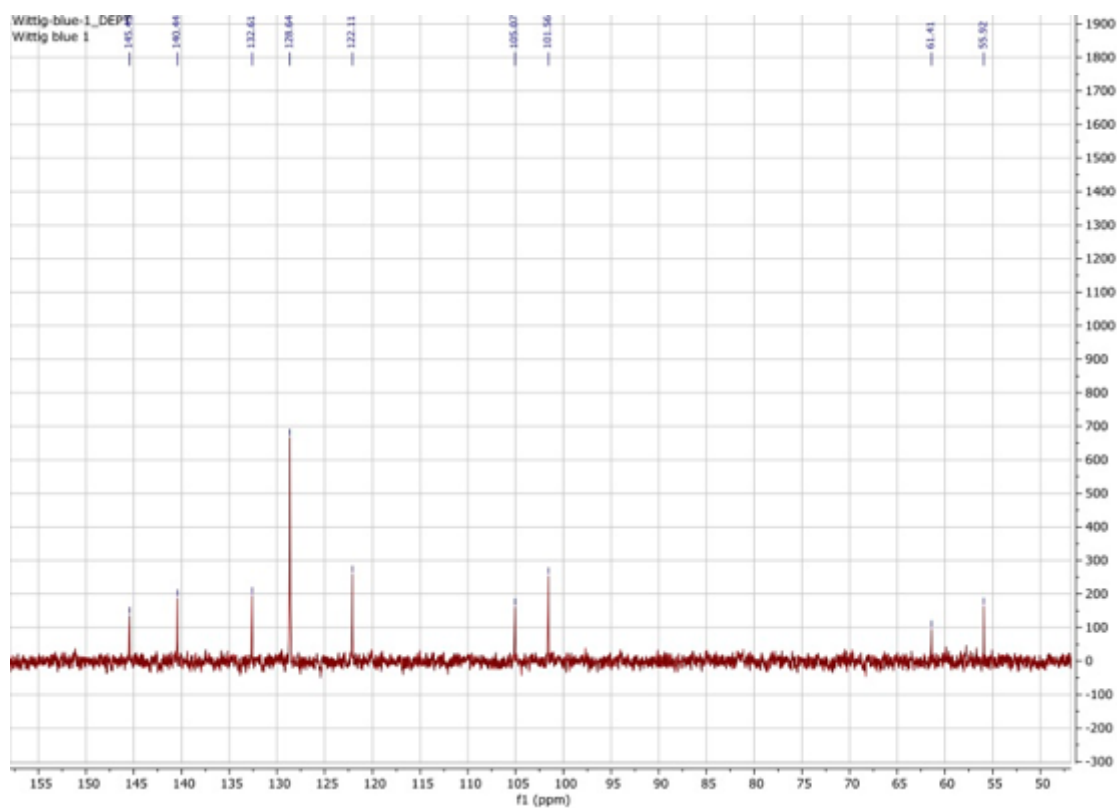

$^{13}\text{C}$  NMR (101 MHz, Chloroform-d)  $\delta$  145.45, 140.44, 132.61, 128.64, 122.11, 105.07, 101.56, 61.41, 55.92.

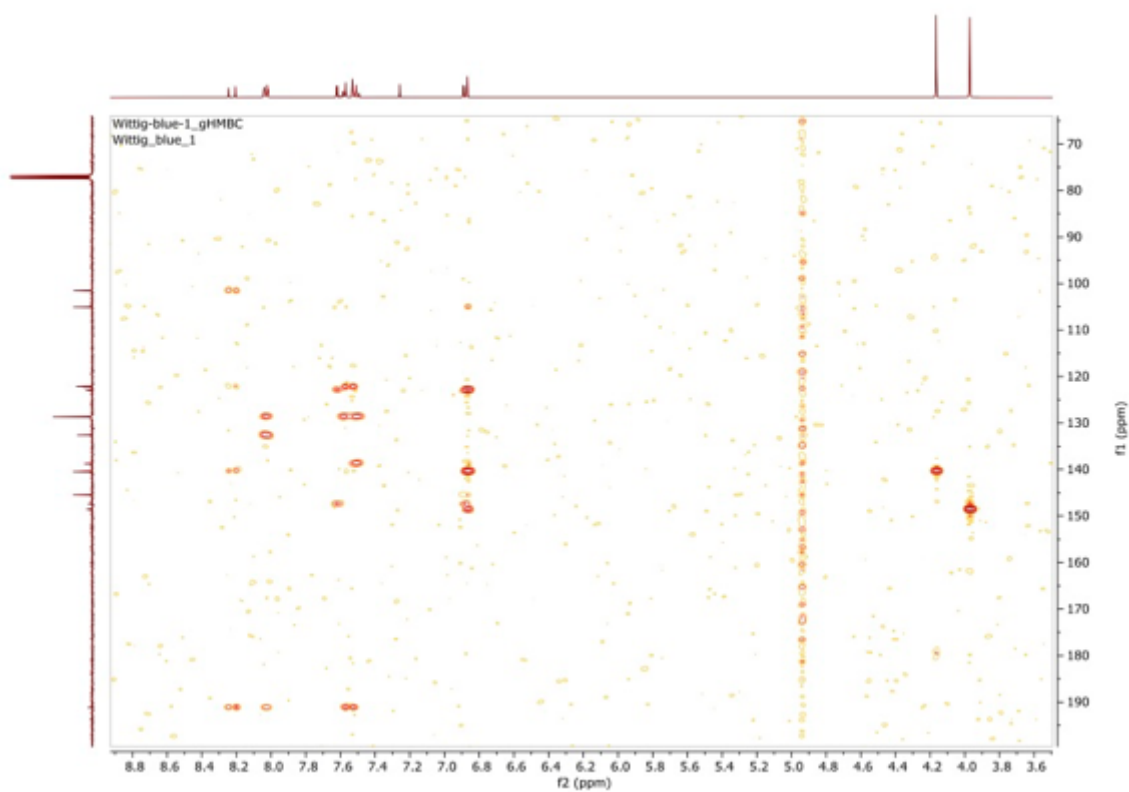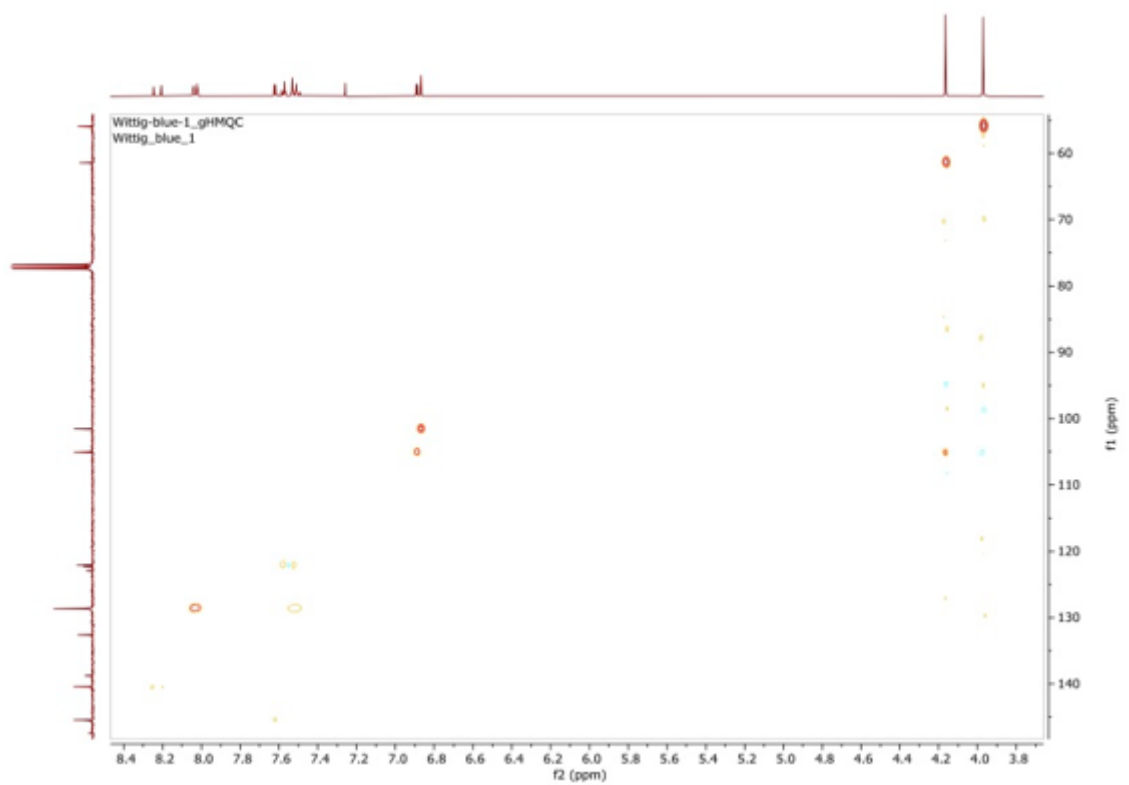

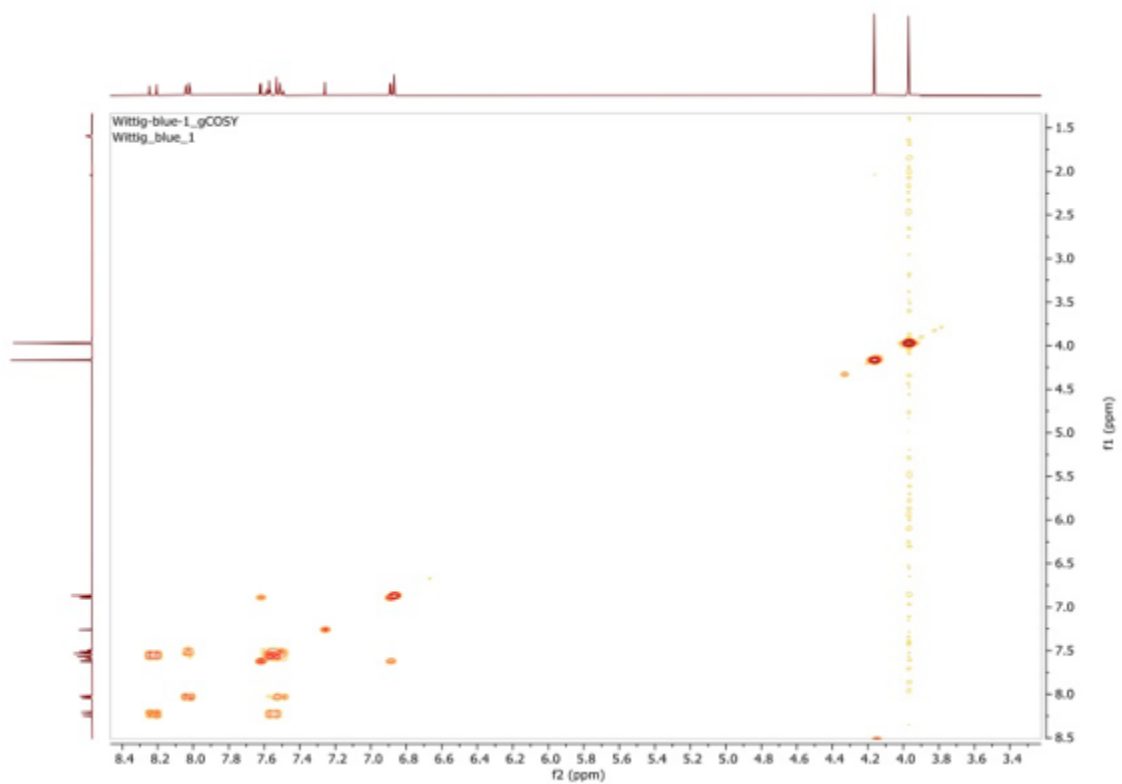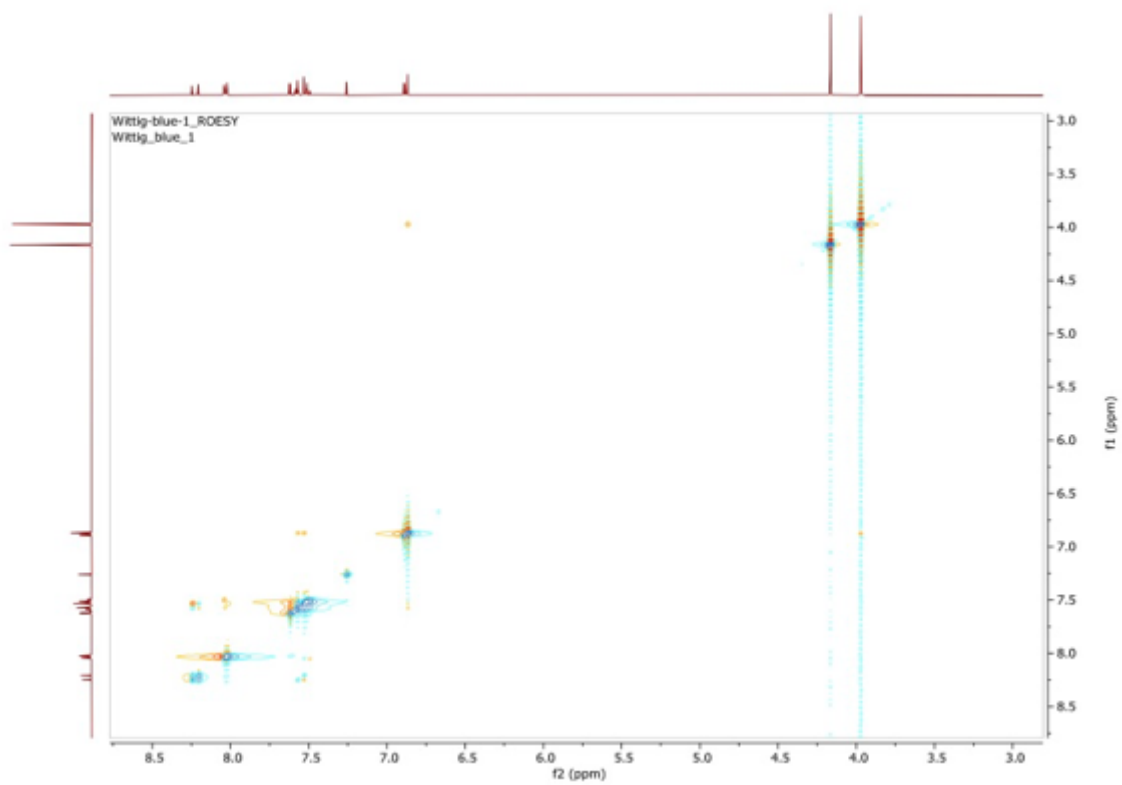



## Area % Report

Data File: C:\32Karat\Projects\Default\Data\delia\Martina\vell T 050521.dat

Method: C:\32Karat\Projects\Default\Method\standard 0.7 ml.met

Acquired: 05/05/2021 15.47.23

Printed: 04/08/2022 13.20.32

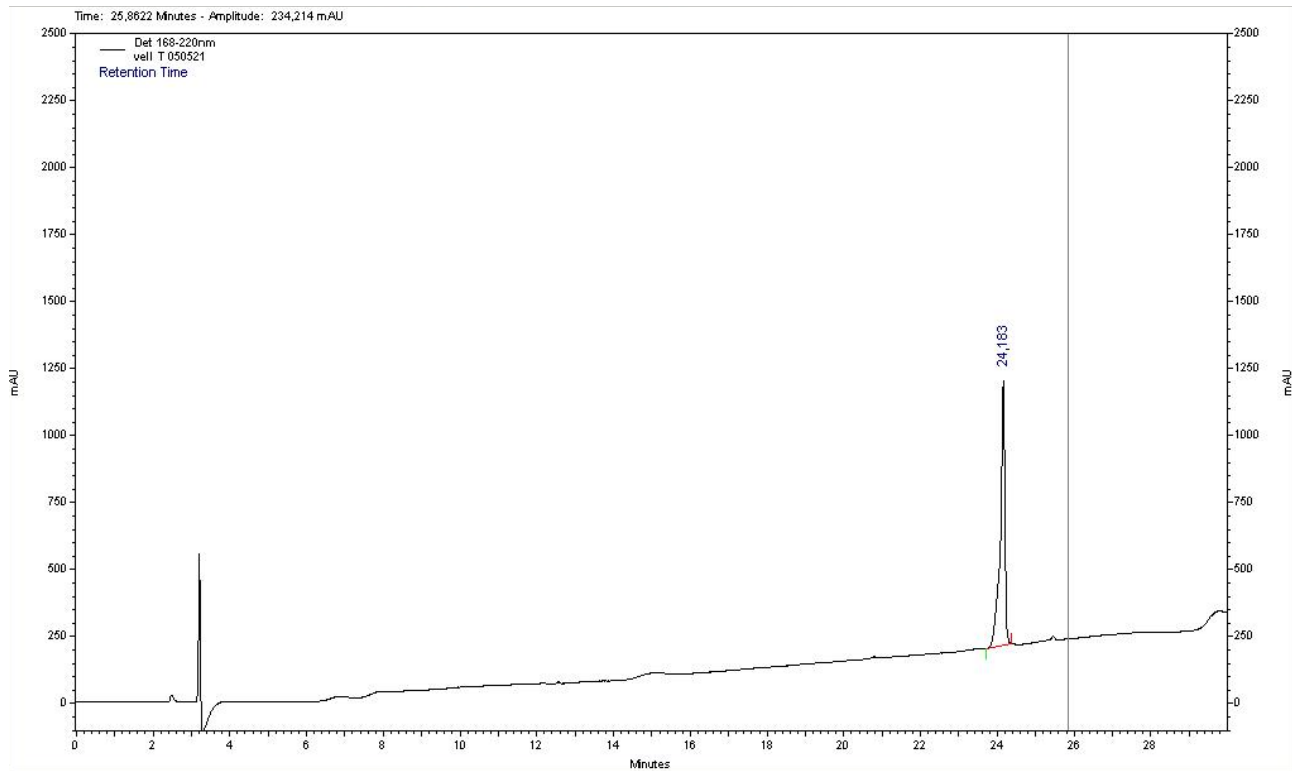

### Det 168-220nm

#### Results

| Time   | Area    | Area % | Height | Height % |
|--------|---------|--------|--------|----------|
| 24,183 | 8149082 | 100,00 | 987191 | 100,00   |
| Totals | 8149082 | 100,00 | 987191 | 100,00   |

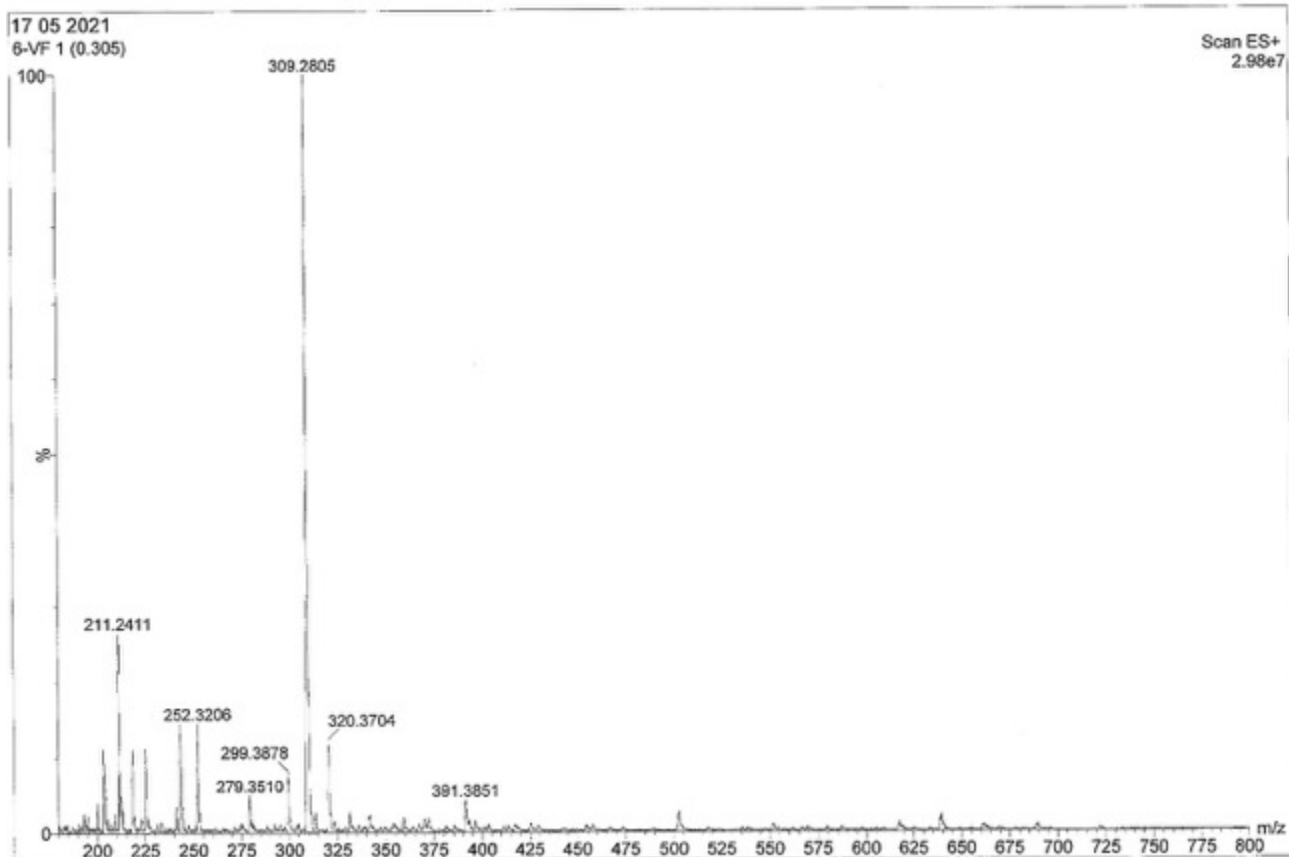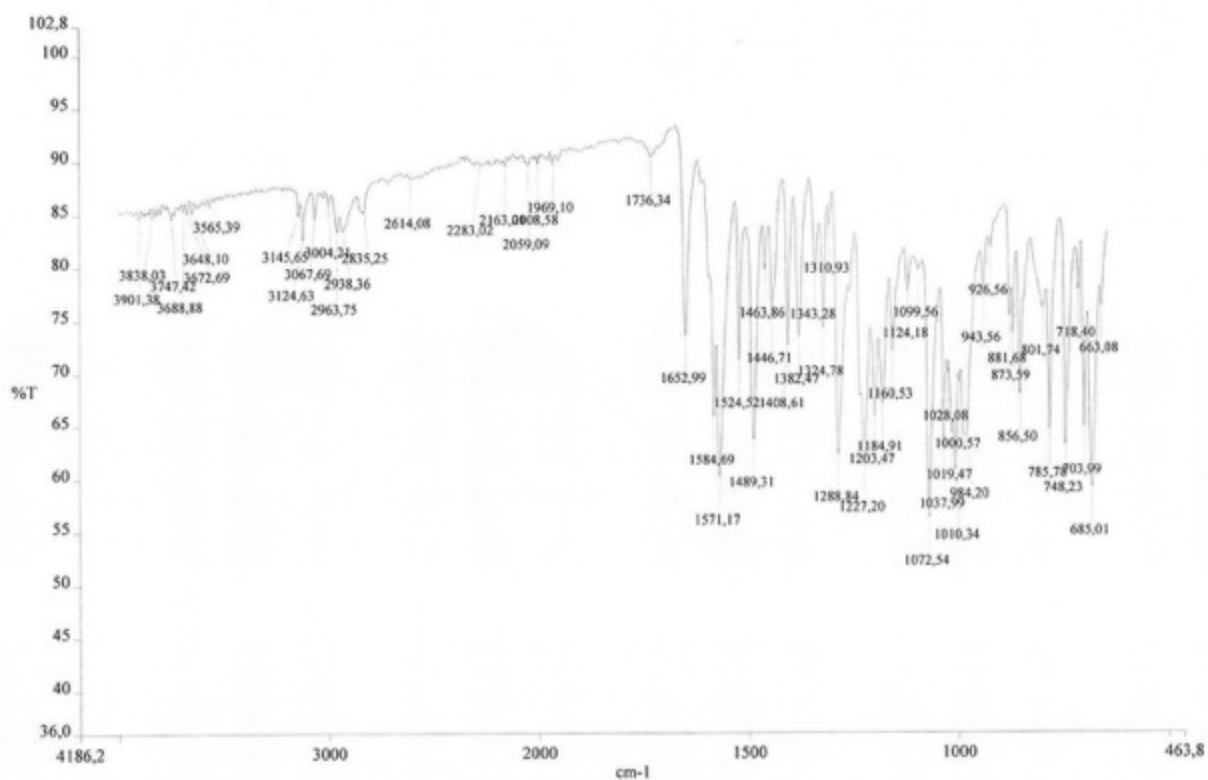

RT : 7.00-12.58

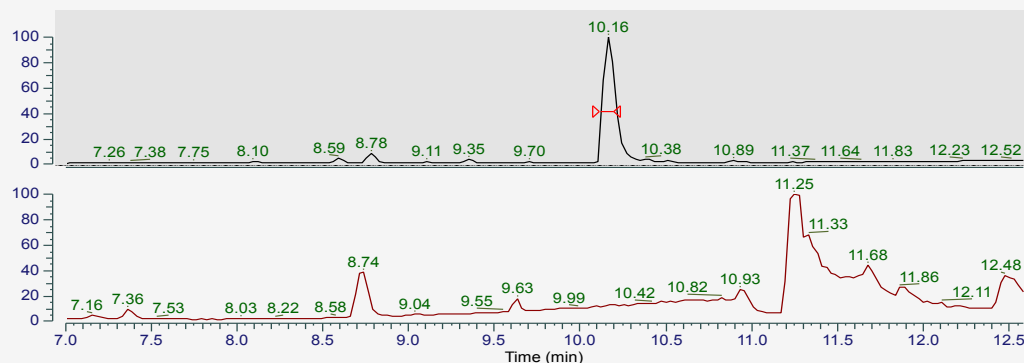

NL: 1.60E9  
Base Peak m/z= 150.0000-  
800.0000 MS F: FTMS + c ESI Full ms  
[100.0000-1000.0000]  
6-VF\_CIGSPP-UniFe\_DDA\_027

NL: 4.73E7  
Base Peak m/z= 150.0000-  
800.0000 MS F: FTMS - c ESI Full ms  
[100.0000-1000.0000]  
6-VF\_CIGSPP-UniFe\_DDA\_027

6-VF\_CIGSPP-UniFe\_DDA\_027 #2177-2198 RT: 10.11-10.2 AV: 4 SB: 7 9.85-10.03 NL: 9.90E+008  
T: FTMS + c ESI Full ms [100.0000-1000.0000]

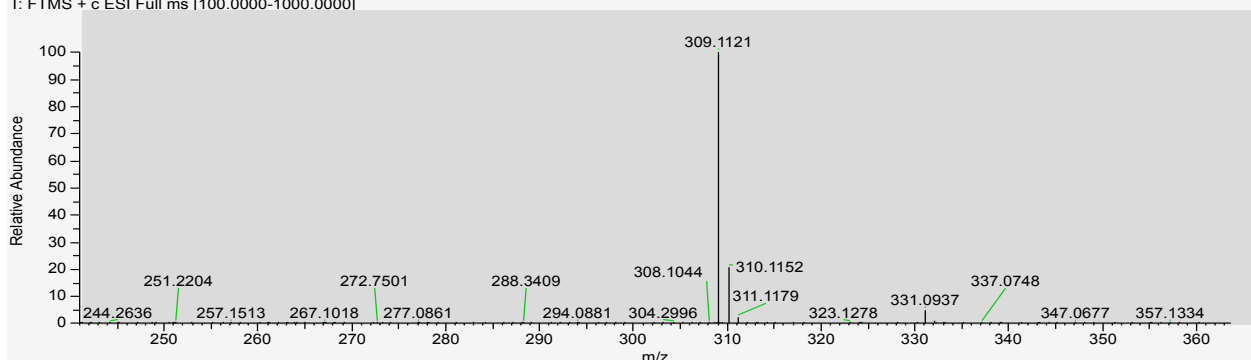

| Peak Mass | Display Formula                                                 | Combined Fit     | RDB  | Delta [ppm] | Theo. mass | Rank | Combined Score | # Matched Iso. | # Missed Iso. | MS Cov. [%] | Pattern Cov. [%] |
|-----------|-----------------------------------------------------------------|------------------|------|-------------|------------|------|----------------|----------------|---------------|-------------|------------------|
| 309,1121  | C <sub>19</sub> H <sub>17</sub> O <sub>4</sub>                  | 18,7690501150057 | 11,5 | -0,21       | 309,11214  | 1    | 95,49          | 4              | 4             | 99,75       | 98,82            |
| 331,0937  | C <sub>19</sub> H <sub>16</sub> O <sub>4</sub> <sup>23</sup> Na | 12,9725080889243 | 11,5 | -1,02       | 331,09408  | 7    | 93,67          | 2              | 6             | 98,15       | 97,22            |
|           |                                                                 |                  |      |             |            |      |                |                |               |             |                  |

6-VF\_CIGSPP-UniFe\_DDA\_027 #2184 RT: 10.14 AV: 1 NL: 1.30E+008  
T: FTMS + c ESI d Full ms2 309.1120@hcd36.00 [50.0000-335.0000]

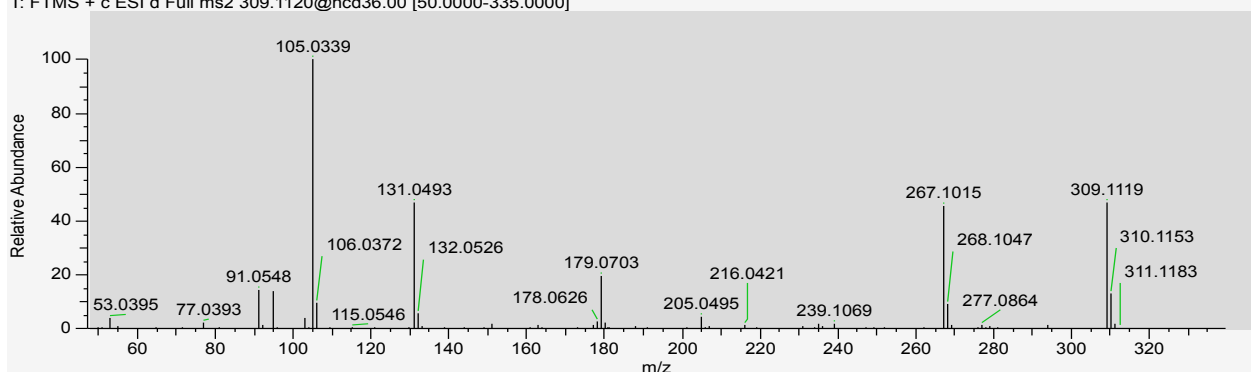

(*E*)-3-(4,7-dimethoxybenzofuran-2-yl)-1-phenylprop-2-en-1-one (22)

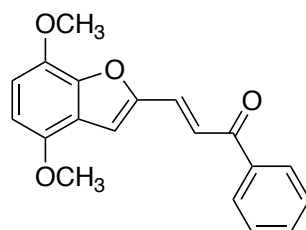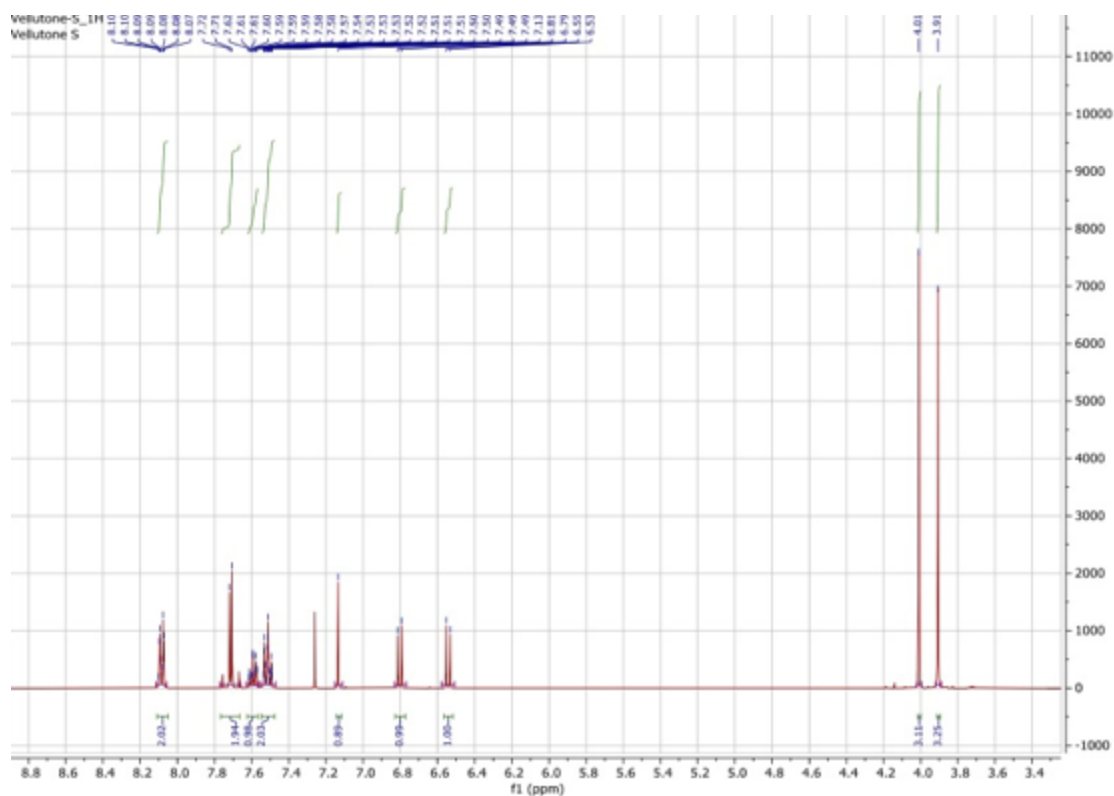

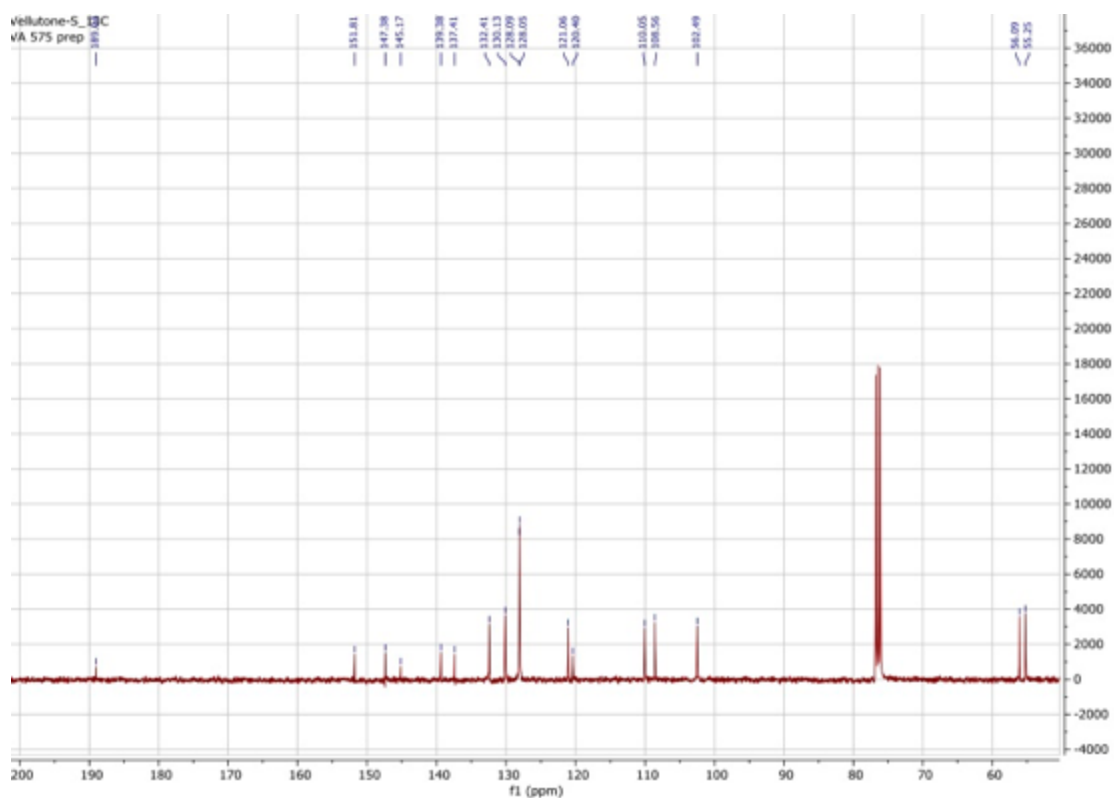

$^{13}\text{C}$  NMR (101 MHz, Chloroform-d)  $\delta$  189.04, 151.81, 147.38, 145.17, 139.38, 137.41, 132.41, 130.13, 128.09, 128.05, 121.06, 120.40, 110.05, 108.56, 102.49, 56.09, 55.25.

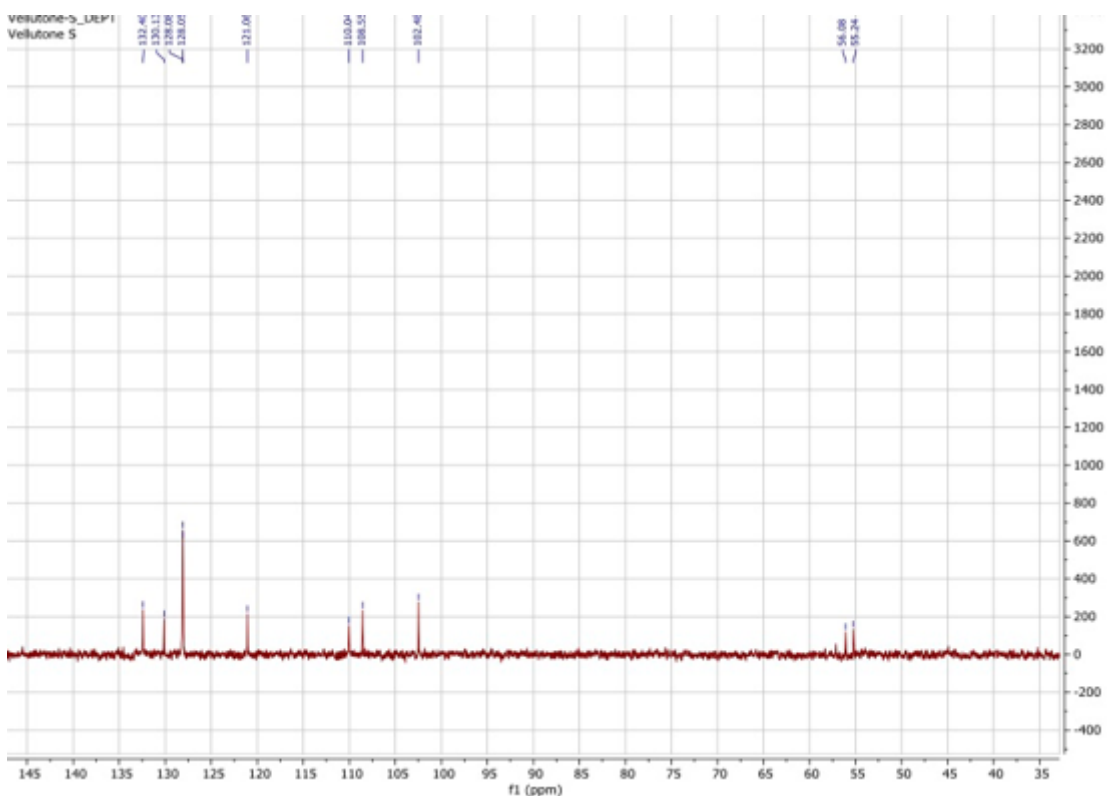

$^{13}\text{C}$  NMR (101 MHz, Chloroform-d)  $\delta$  132.40, 130.13, 128.08, 128.05, 121.06, 110.04, 108.55, 102.48, 56.08, 55.24.

## Area % Report

Data File: C:\32Karat\Projects\Default\Data\delia\Martina\vellutone S.dat  
 Method: C:\32Karat\Projects\Default\Method\standard 0.7 ml.met  
 Acquired: 15/04/2021 15.58.12  
 Printed: 04/08/2022 13.12.03

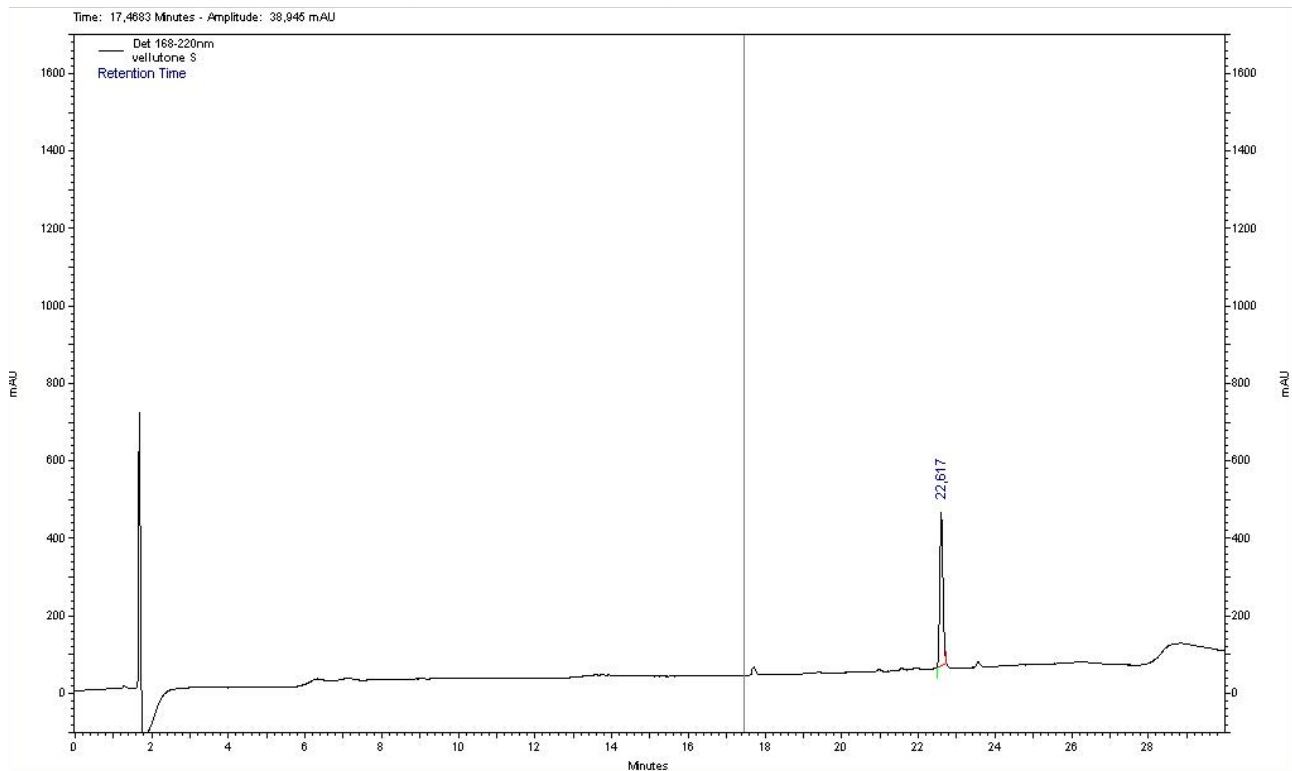

**Det 168-220nm  
Results**

| Time   | Area    | Area % | Height | Height % |
|--------|---------|--------|--------|----------|
| 22,617 | 2249606 | 100,00 | 392360 | 100,00   |
| Totals | 2249606 | 100,00 | 392360 | 100,00   |

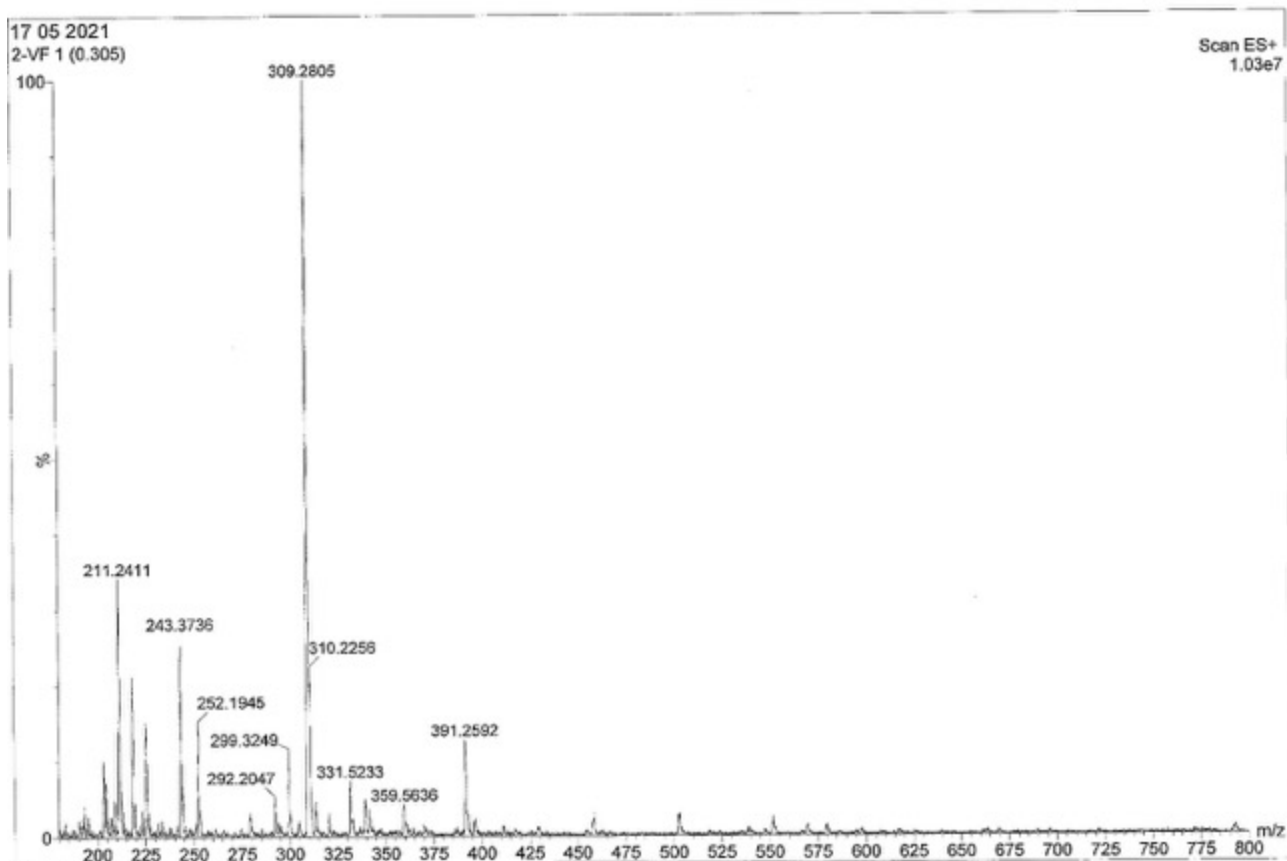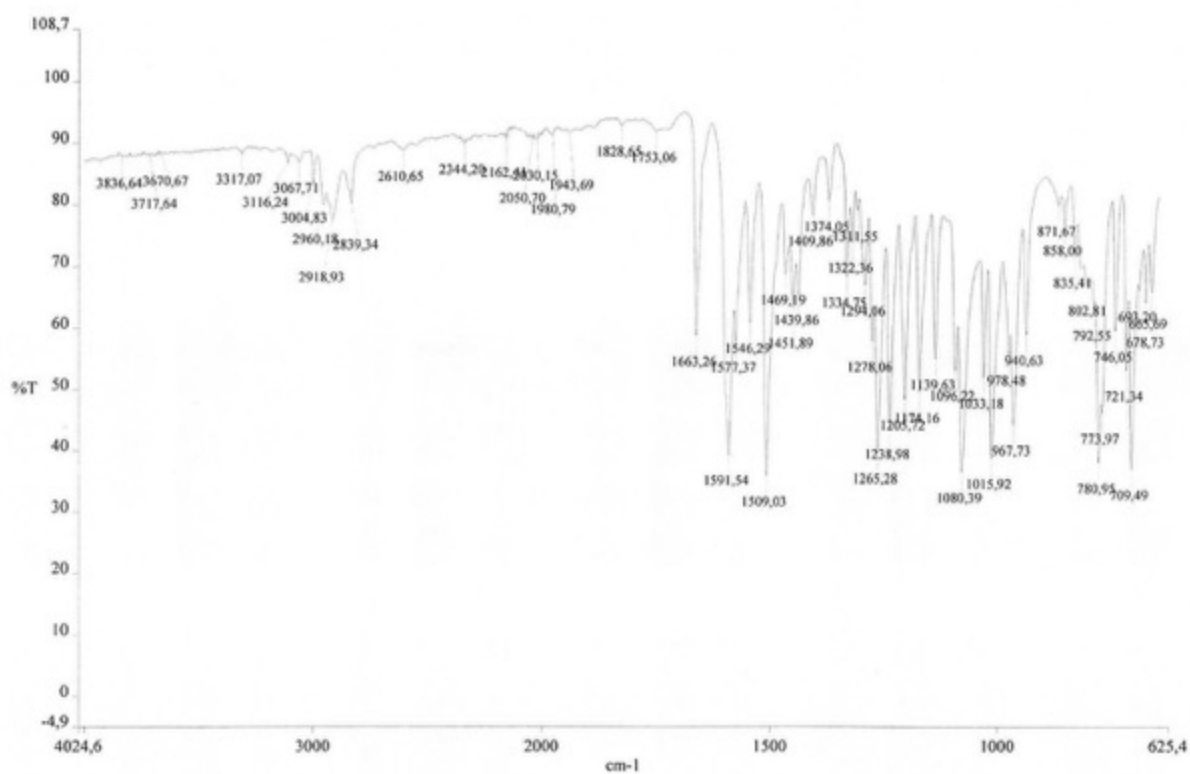

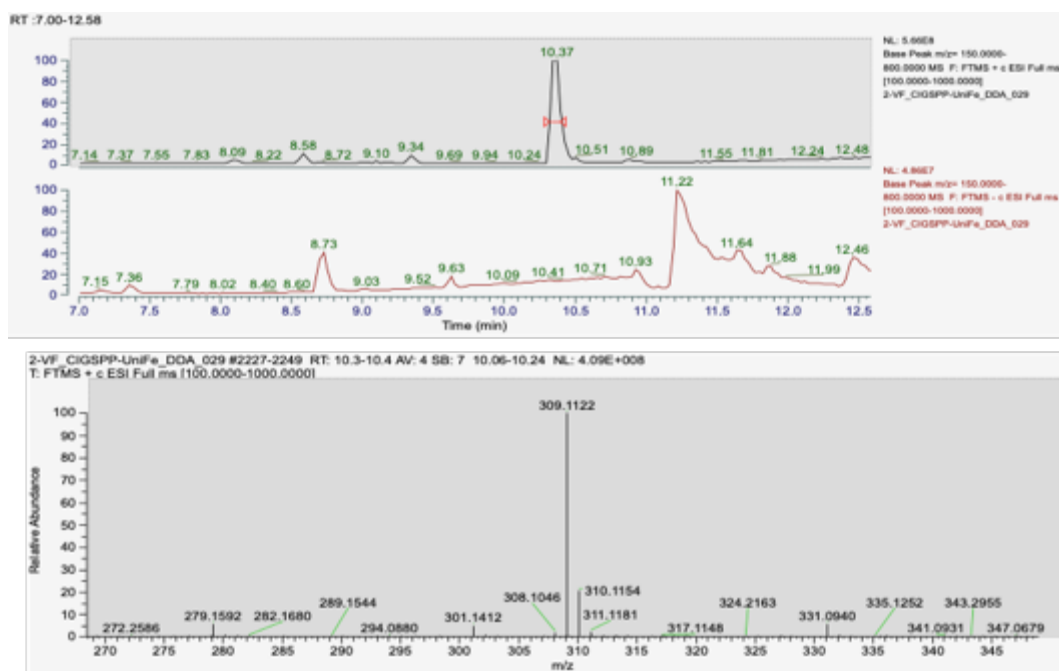

| Peak Mass | Display Formula                                                 | Combined Fit     | RDB  | Delta [ppm] | Theo. mass | Rank | Combined Score | # Matched Iso. | # Missed Iso. | MS Cov. [%] | Pattern Cov. [%] |
|-----------|-----------------------------------------------------------------|------------------|------|-------------|------------|------|----------------|----------------|---------------|-------------|------------------|
| 309,1122  | C <sub>19</sub> H <sub>17</sub> O <sub>4</sub>                  | 25,1421183814927 | 11,5 | 0,19        | 309,11214  | 1    | 95,94          | 4              | 4             | 99,87       | 98,96            |
| 331,094   | C <sub>19</sub> H <sub>16</sub> O <sub>4</sub> <sup>23</sup> Na | 17,8402298795552 | 11,5 | -0,37       | 331,09408  | 3    | 95,07          | 3              | 5             | 99,37       | 98,83            |

2-VF\_CIGSPP-UniFe\_DDA\_029 #2233 RT: 10.33 AV: 1 NL: 3.71E+007  
 T: FTMS + c ESI d Full ms2 309.1123@hcd36.00 [50.0000-335.0000]

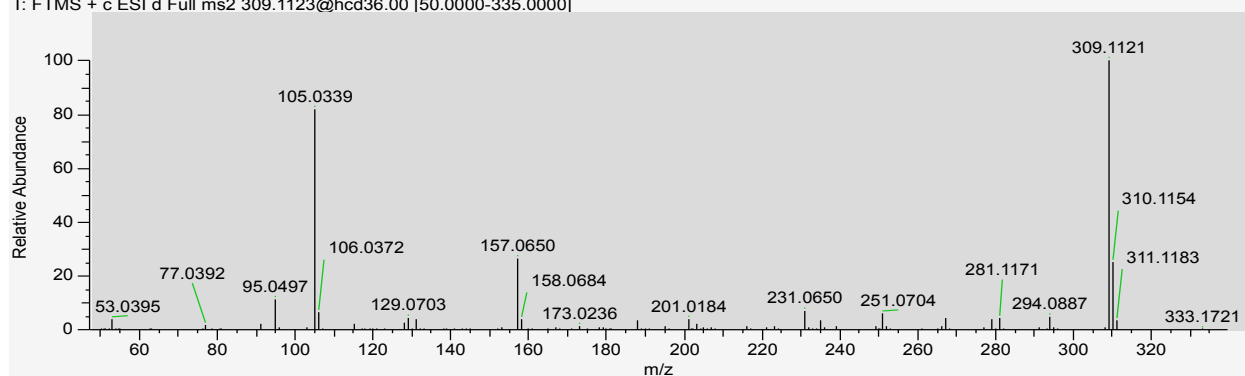



(*E*)-3-(4,7-dimethoxybenzofuran-3-yl)-1-phenylprop-2-en-1-one (28)

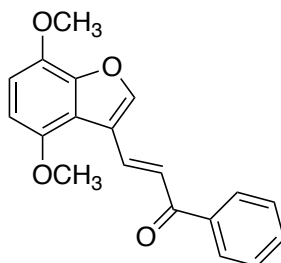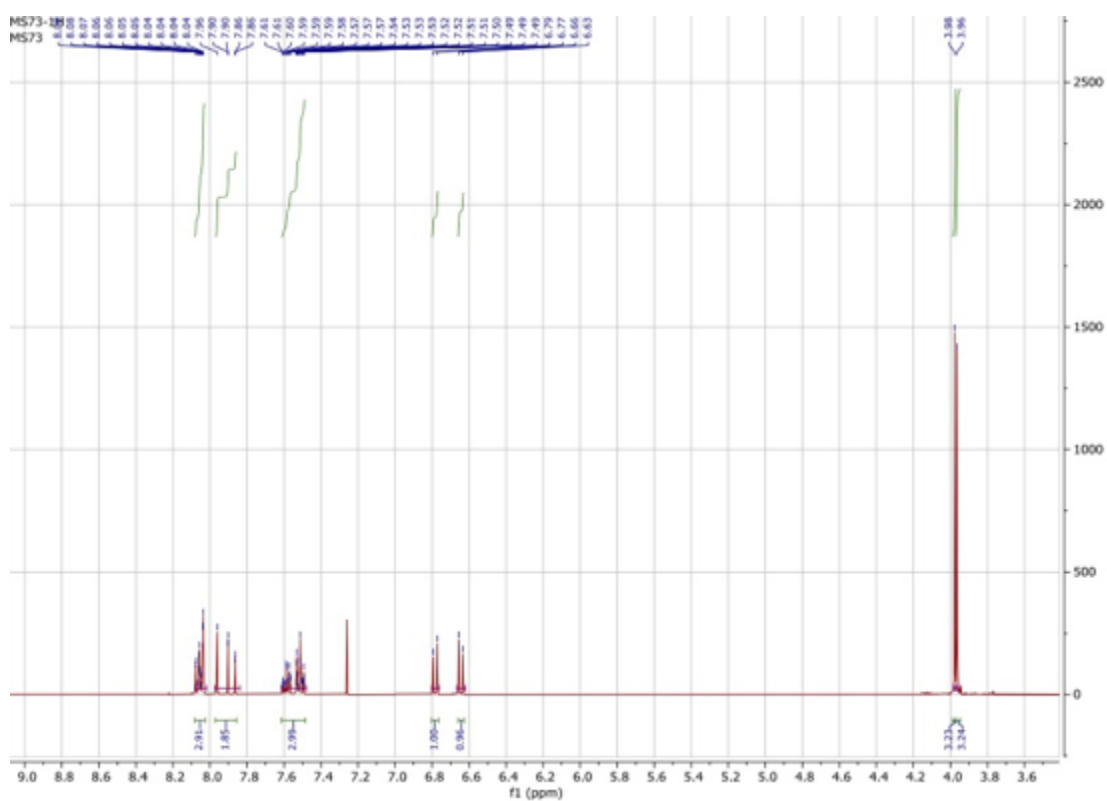

$^1\text{H}$  NMR (400 MHz, Chloroform-*d*)  $\delta$  8.08 – 8.02 (m, 3H), 7.97 – 7.84 (m, 2H), 7.61 – 7.48 (m, 3H), 6.78 (d,  $J$  = 8.6 Hz, 1H), 6.65 (d,  $J$  = 8.7 Hz, 1H), 3.98 (s, 3H), 3.96 (s, 3H).

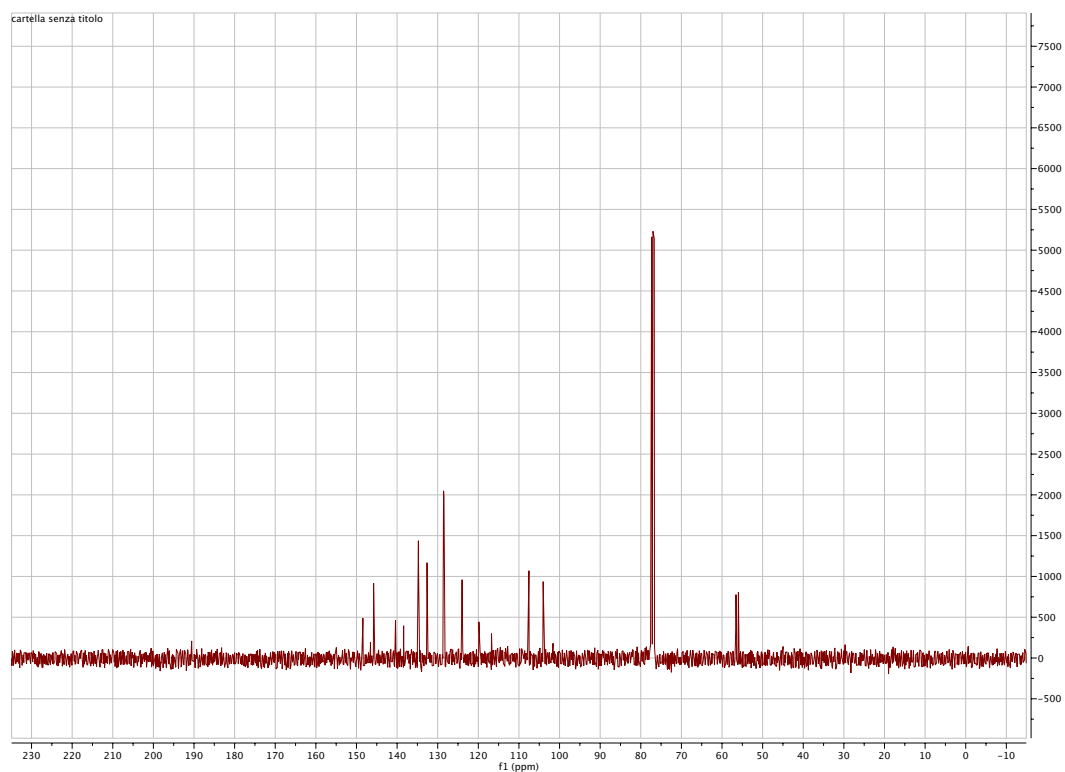

$^{13}\text{C}$  NMR (101 MHz, Chloroform-d)  $\delta$  190.58, 148.41, 146.56, 145.78, 140.38, 138.38, 134.75, 132.62, 128.56, 128.46, 124.00, 119.85, 116.75, 107.53, 104.04, 56.56, 55.96.

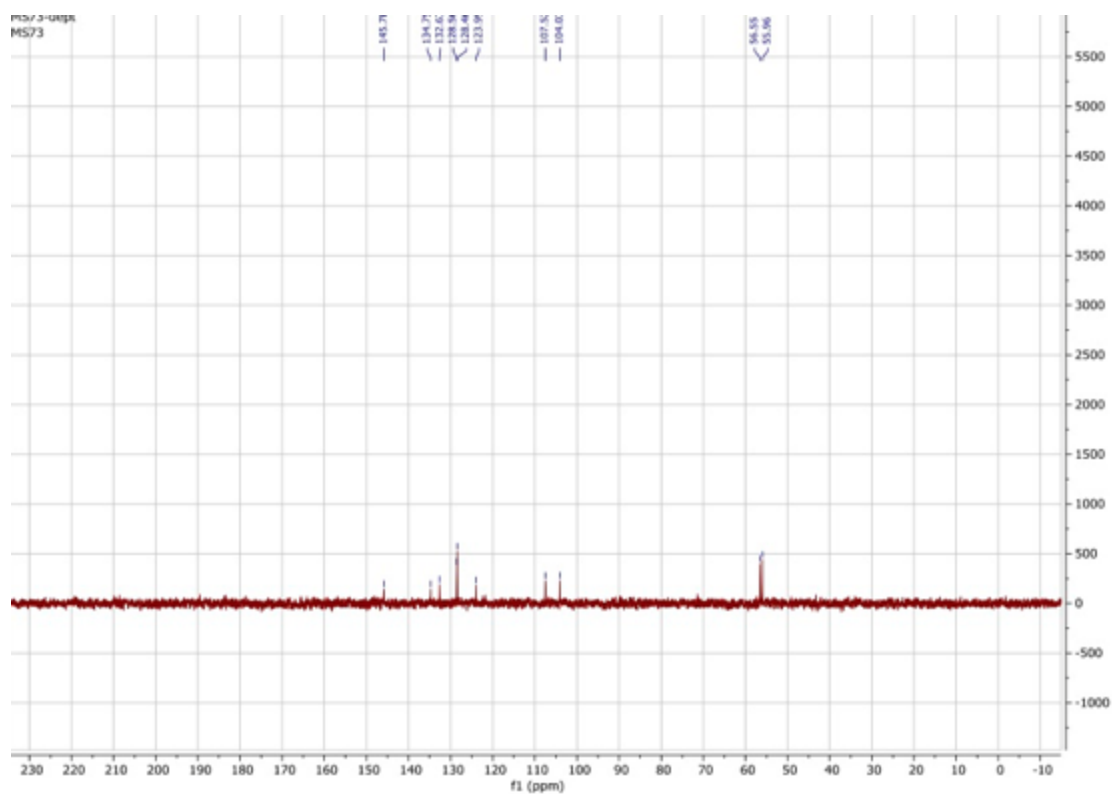

$^{13}\text{C}$  NMR (101 MHz, Chloroform-d)  $\delta$  145.78, 134.75, 132.63, 128.56, 128.46, 123.99, 107.52, 104.03, 56.55, 55.96.

## Area % Report

Data File: C:\32Karat\Projects\Default\Data\delia\Martina\vellutone Z.dat  
 Method: C:\32Karat\Projects\Default\Method\standard 0.7 ml.met  
 Acquired: 16/04/2021 8.50.00  
 Printed: 04/08/2022 13.22.32

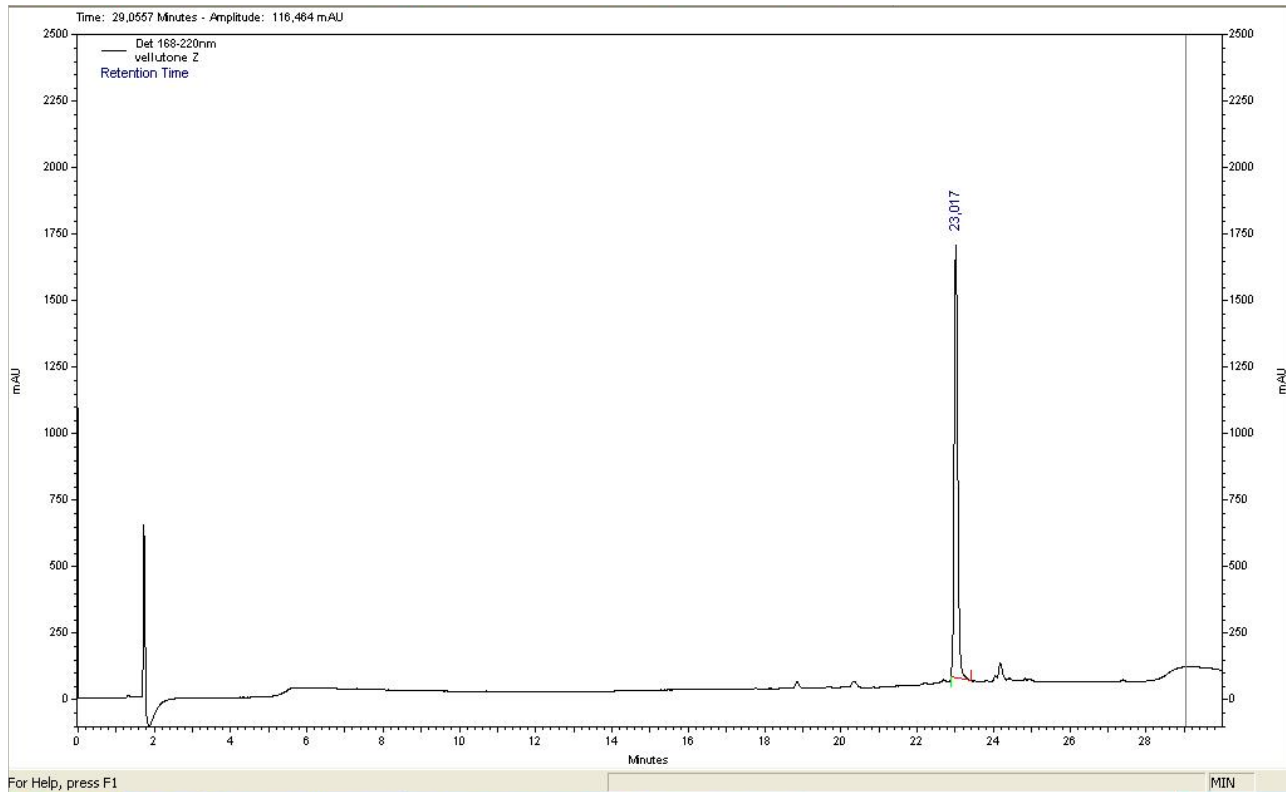

### Det 168-220nm Results

| Time   | Area     | Area % | Height  | Height % |
|--------|----------|--------|---------|----------|
| 23,017 | 10467135 | 100,00 | 1624633 | 100,00   |
| Totals | 10467135 | 100,00 | 1624633 | 100,00   |

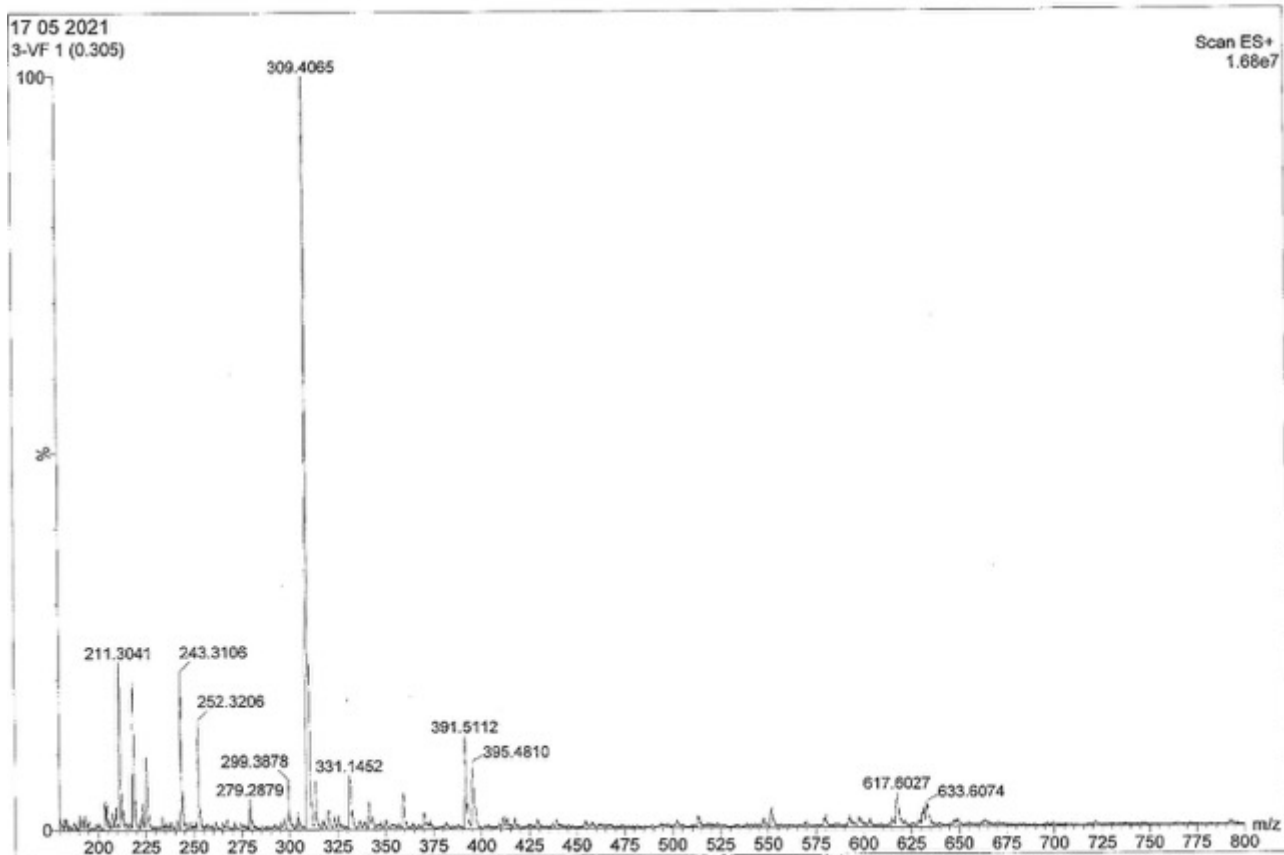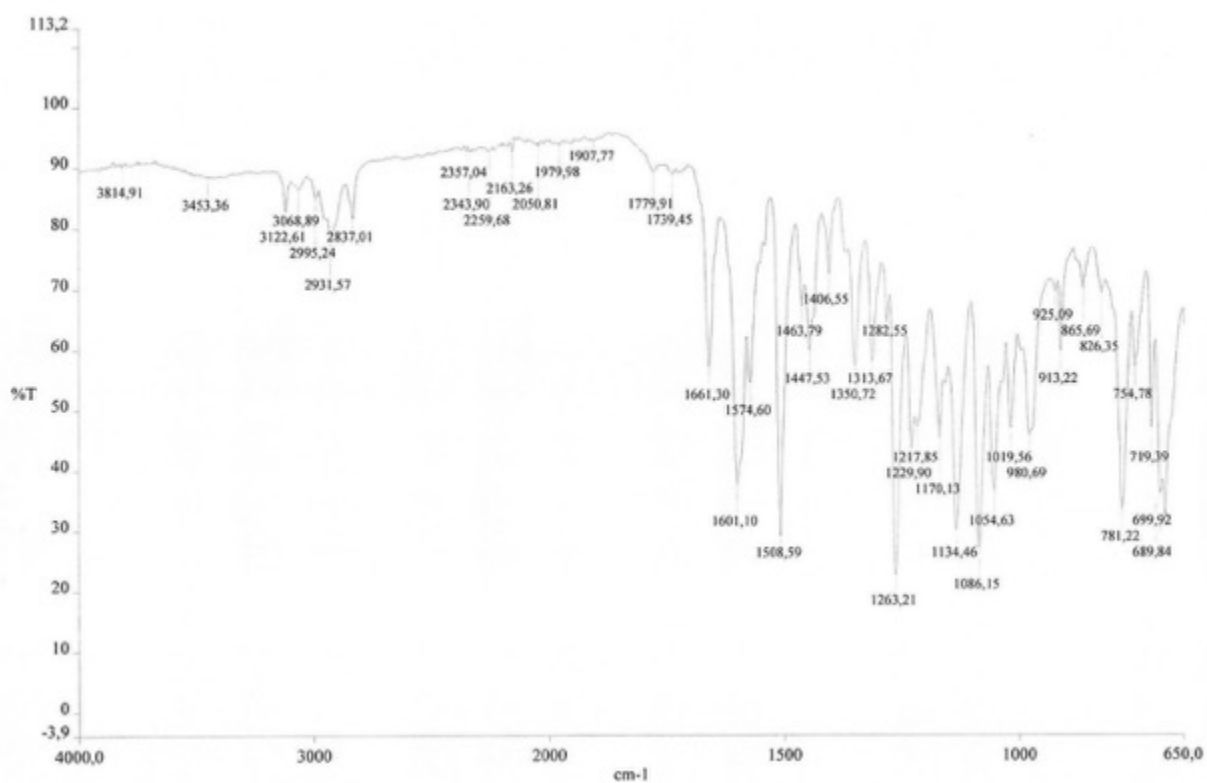

RT :7.00-12.58

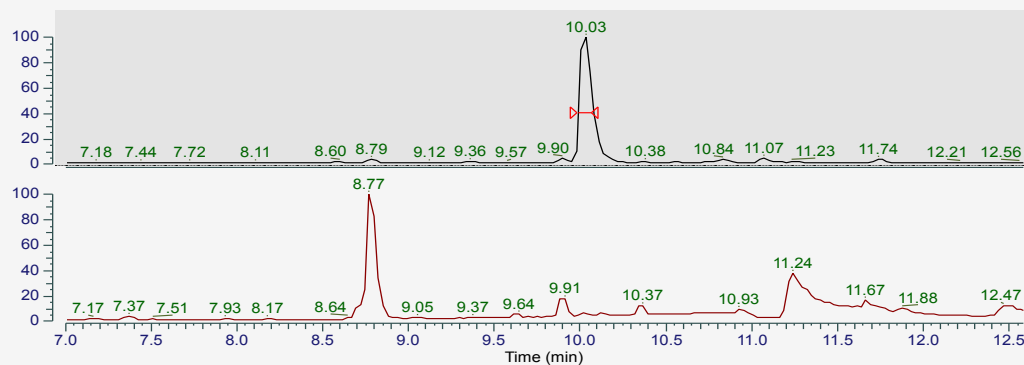

NL: 4.88E9  
Base Peak m/z= 150.0000-  
800.0000 MS F: FTMS + c ESI Full ms  
[100.0000-1000.0000]  
3-VF\_CIGSPP-UniFe\_DDA\_030

NL: 1.33E8  
Base Peak m/z= 150.0000-  
800.0000 MS F: FTMS - c ESI Full ms  
[100.0000-1000.0000]  
3-VF\_CIGSPP-UniFe\_DDA\_030

3-VF\_CIGSPP-UniFe\_DDA\_030 #2158-2183 RT: 9.97-10.08 AV: 5 SB: 5 9.81-9.94 NL: 2.93E9  
T: FTMS + c ESI Full ms [100.0000-1000.0000]

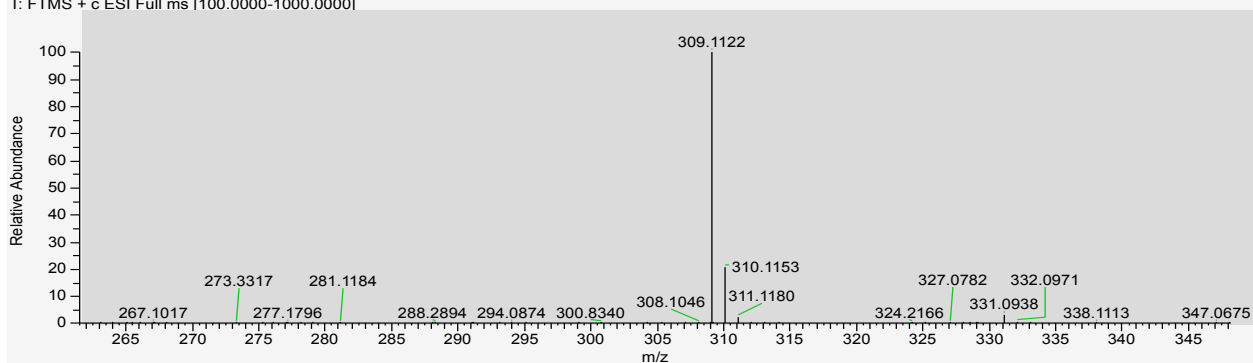

| Peak Mass | Display Formula                                                  | Combined Fit     | RDB  | Delta [ppm] | Theo. mass | Rank | Combined Score | # Matched Iso. | # Missed Iso. | MS Cov. [%] | Pattern Cov. [%] |
|-----------|------------------------------------------------------------------|------------------|------|-------------|------------|------|----------------|----------------|---------------|-------------|------------------|
| 309,1122  | C <sub>19</sub> H <sub>17</sub> O <sub>4</sub>                   | 23,7200377676601 | 11,5 | 0,2         | 309,11214  | 1    | 95,94          | 4              | 4             | 99,96       | 98,96            |
| 331,0938  | C <sub>19</sub> H <sub>16</sub> O <sub>4</sub> <sup>2,3</sup> Na | 15,094285170234  | 11,5 | -0,81       | 331,09408  | 5    | 93,79          | 2              | 5             | 98,16       | 97,31            |
